# Supplementary material for: DFT study on isothiourea-catalyzed C–C bond activation of cyclobutenone: the role of the catalyst and the origin of stereoselectivity
Source: Royal Society of Chemistry journal article supplement (doi:10.1039/d4ob00267a), 2024-01-01
Supplement: d4ob00267a1.pdf [file d4ob00267a1.pdf]

**Electronic Supplementary Information For**  
**DFT study on isothiourea-catalyzed C-C bond activation of**  
**cyclobutenone: role of catalyst and origin of stereoselectivity**

Daochang Li and Yang Wang\*

Content

|                                                                                               |     |
|-----------------------------------------------------------------------------------------------|-----|
| Part 1: Benchmark study for C-C bond cleavage process .....                                   | 2   |
| Part 2: Possible electrocyclic ring-open modes.....                                           | 3   |
| Part 3: Energy profile involved in R-configured cyclobutenone R-R1 .....                      | S4  |
| Part 4: The alternative conjugate-addition mechanism .....                                    | S5  |
| Part 5: Configurational search for stereoselective transition states .....                    | S6  |
| Part 6: Energy profile of the other three pathways.....                                       | S7  |
| Part 7: Substituent effects on the ring-open process .....                                    | S8  |
| Part 8: Derivation of the calculated ee value .....                                           | S9  |
| Part 9: NCI and AIM analyses for TS3RR and TS3SS .....                                        | S10 |
| Part 10: Catalyst effect.....                                                                 | S11 |
| Part 11: IRC plots of TS3SR .....                                                             | S13 |
| Part 12: Cartesian coordinates of all the stationary points involved in the calculations..... | S14 |

---

## Part 1: Benchmark study for C-C bond cleavage process

**Table S1.** Gibbs free energy barriers for C-C bond cleavage process in different methods

|             | B3LYP | B3PW91 | CamB3LYP | M06-2X-D3 | $\omega$ B97X-D |
|-------------|-------|--------|----------|-----------|-----------------|
| <b>TS1A</b> | -     | 28.2   | 25.9     | 19.5      | 20.7            |
| <b>TS2A</b> | 47.1  | 46.5   | 43.4     | 36.0      | 42.4            |
| <b>TS1B</b> | 24.2  | 25.0   | 27.4     | 26.2      | 27.8            |

## Part 2: Possible electrocyclic ring-open modes

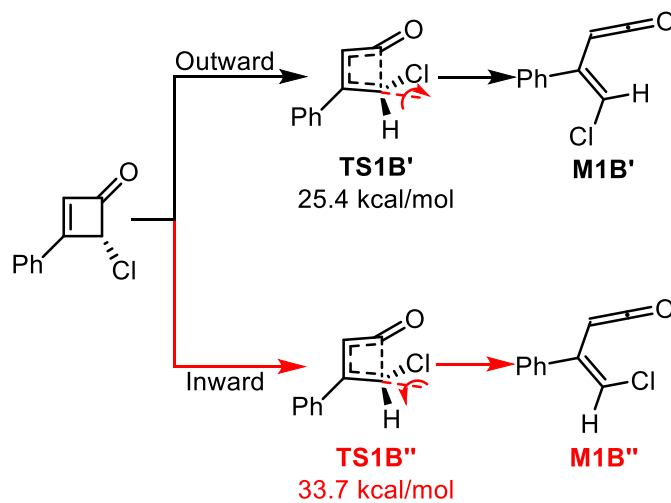

**Scheme S1.** The possible electrocyclic ring-open modes for the ring-open process of cyclobutenone

### Part 3: Energy profile involved in R-configured cyclobutenone R-R1

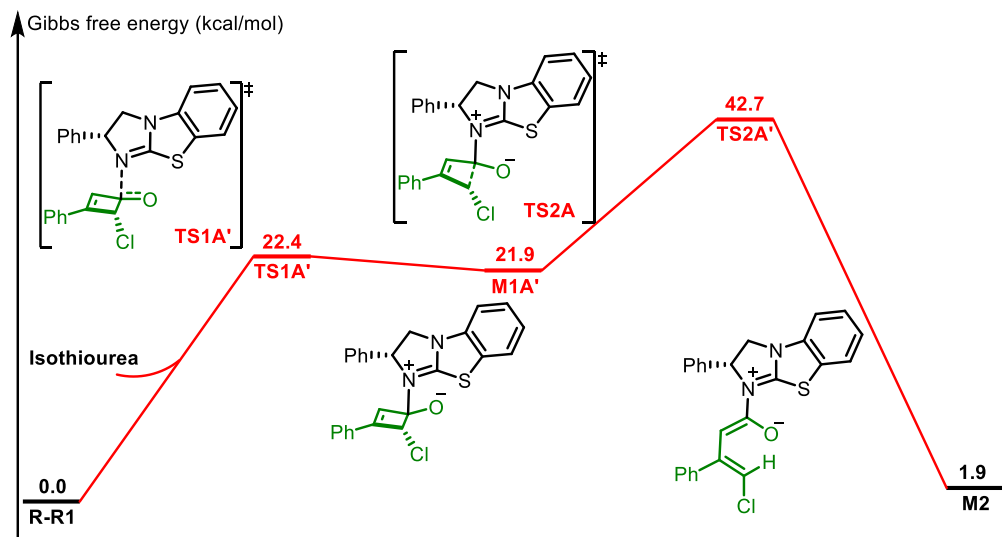

Fig. S1 Energy profile involved in R-configured cyclobutenone R-R1

---

## Part 4: The alternative conjugate-addition mechanism

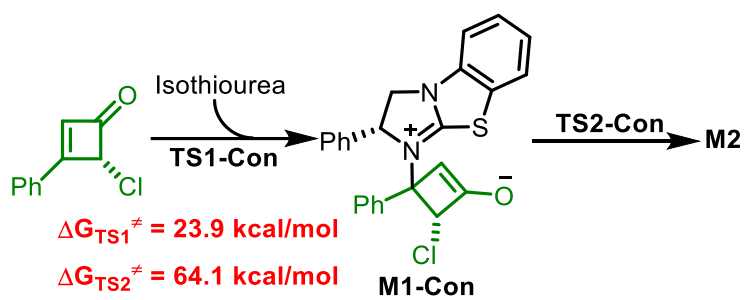

**Scheme S2.** The alternative conjugate-addition mechanism

## Part 5: Configurational search for stereoselective transition states

**Table S2.** Different conformations of the transition states involved in the [3 + 2] cycloaddition step

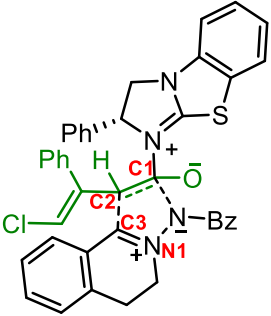

|    | TS3  | TS3-90 | TS3-180 | TS3-270 |
|----|------|--------|---------|---------|
| RR | 29.8 | 29.9   | 34.5    | 38.4    |
| RS | 22.8 | 35.33  | 33.9    | 25.0    |
| SR | 17.7 | 20.6   | 27.9    | 30.3    |
| SS | 20.7 | 20.9   | 25.5    | 20.7    |

We have additionally considered and investigated the different conformations of TS3s involved in the [3 + 2] cycloaddition step. By rotating dihedral angle  $\Phi_1(\text{C1-C2-C3-N1})$  from 0~360° at intervals of 90° based on the original transition states TS3RR, TS3RS, TS3SR, and TS3SS, we have constructed sixteen ( $4 \times 4 = 16$ ) initial structures of TS3s and located sixteen conformations after the optimization, which are summarized in Table S2. As an important note, the initial structures by rotating the dihedral  $\Phi_1$  with 90° would lead to the same conformations of those with  $\Phi_1 = 0^\circ/360^\circ$  after the structural optimizations. Moreover, the TS3RR-90, TS3SS-90 and TS3SS-270 have the same structure with the corresponding original transition states after optimizations. The relative Gibbs free energies depicted in Table S2 show that the one-step transition state indeed have the lowest energies among their stepwise conformers.

## Part 6: Energy profile of the other three pathways

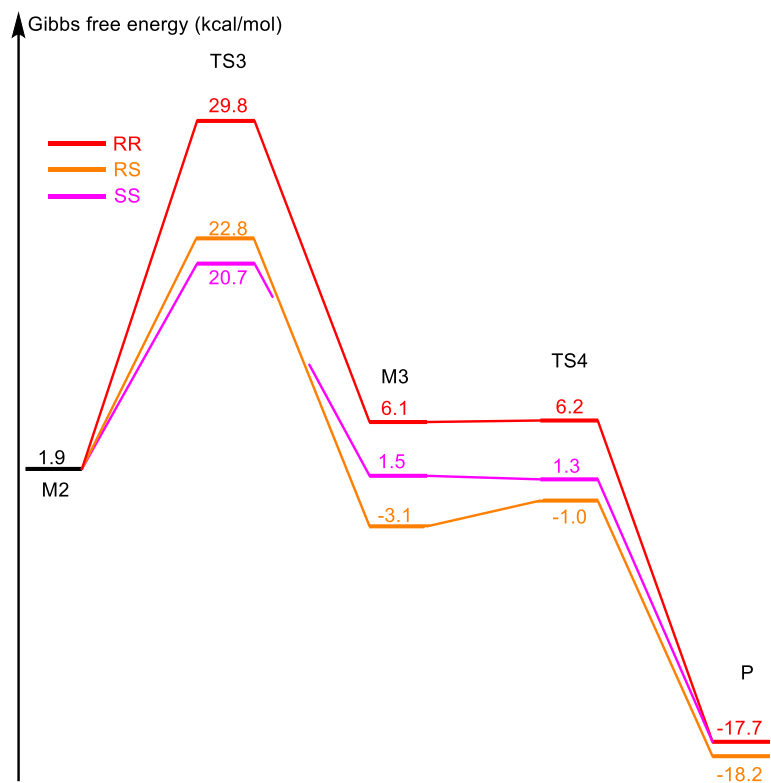

**Fig. S2** Energy profiles for the reaction between ammonium-bound enolate and azomethine imine involved in RR, RS, and SS pathways

---

## Part 7: Substituent effects on the ring-open process

**Table S3.** The energy barriers for different types of cyclobutenones (values in parentheses represent the energy barriers of *S*-configured cyclobutenone)

| 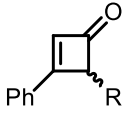 | $\Delta G^{\ddagger}_{\text{TS1B}}$ | $\Delta G^{\ddagger}_{\text{TS2A}}$ |
|-----------------------------------------------------------------------------------|-------------------------------------|-------------------------------------|
| R=Cl                                                                              | 25.4(25.4)                          | 42.7 (29.6)                         |
| R=H                                                                               | 28.3                                | 49.0                                |
| R=Me                                                                              | 29.2(29.3)                          | 48.3(37.6)                          |



---

## Part 8: Derivation of the calculated ee value

The predicted ee value is calculated by using Boltzmann distribution along with the stereoselective transition states through the following equations:

$$\frac{[R]}{[S]} = \frac{e^{-G_R^\ddagger/RT}}{e^{-G_S^\ddagger/RT}} = e^{\Delta G^\ddagger/RT} \quad (1)$$

$$ee\% = \frac{[R]-[S]}{[R]+[S]} \times 100\% = \frac{[R]/[S]-1}{[R]/[S]+1} \times 100\% \quad (2)$$

In the equation (1), the  $\Delta G^\ddagger$  is the difference in Gibbs free energies of the stereoselective transition states, R is the gas constant ( $R=8.314 \text{ J}\cdot\text{mol}^{-1}\cdot\text{K}^{-1}$ ), T is the temperature ( $T=298.15 \text{ K}$  in the reaction).

For the present study, the computational results show that the reaction between ammonium-bound enolate **M2** and azomethine imine **R2** determines the stereoselectivity associated with transition state **TS3**. The calculated results also indicate that the *SR*-configured pathway has the lowest energy barrier and the energy difference between **TS3SR** and **TS3RS** is 5.2 kcal/mol. That is, the value of  $\Delta G^\ddagger$  in equation (1) is 5.2 kcal/mol. Thus, we can obtain the value of  $[R]/[S]$ , which is calculated to be 6735.1. Then, the value of  $[R]/[S]$  is substituted into equation, the calculated ee value can be obtained by 99.9%, which is very closed to the experimental observed ee value (92%).

## Part 9: NCI and AIM analyses for TS3RR and TS3SS

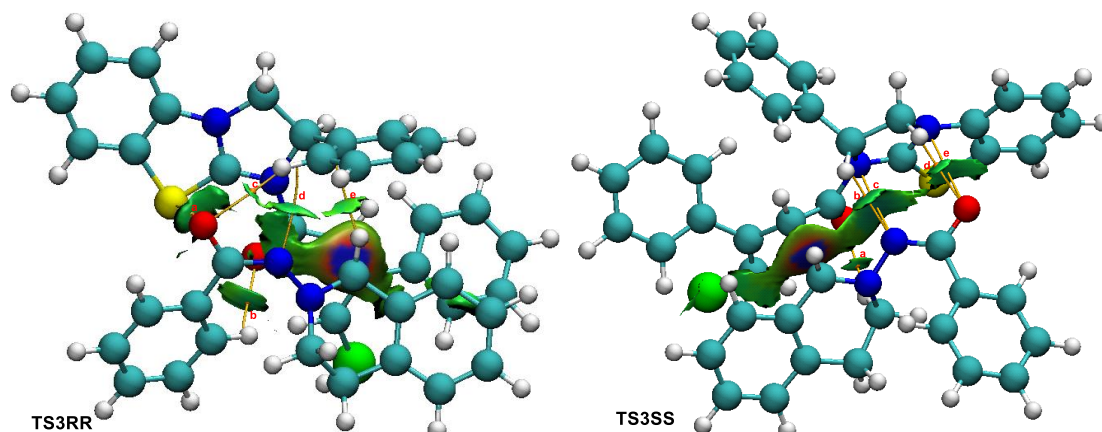

**Fig. S3** Qualitative analysis for the stereoselective transition states TS3RR and TS3SS using NCI and AIM

**Table S4.** Quantitative verifications of the weak interactions involved in the stereoselective transition states TS3RS and TS3SR

| TS3RS     |                     |              |                                           | TS3SR     |                     |              |                                           |
|-----------|---------------------|--------------|-------------------------------------------|-----------|---------------------|--------------|-------------------------------------------|
| BCP index | Type of interaction | Distance (Å) | $\rho_{\text{bcp}} \times 10^{-1}$ (a.u.) | BCP index | Type of interaction | Distance (Å) | $\rho_{\text{bcp}} \times 10^{-1}$ (a.u.) |
| a         | O...S               | 3.22         | 0.3417                                    | a         | C-H...O             | 2.37         | 0.4118                                    |
| b         | C-H...O             | 2.35         | 0.5227                                    | b         | C-H...N             | 2.46         | 0.4264                                    |
| c         | C-H...O             | 2.57         | 0.2700                                    | c         | LP... $\pi$         | 2.79         | 0.6107                                    |
| d         | C-H...N             | 2.53         | 0.3679                                    | d         | C-H...O             | 2.49         | 0.3950                                    |
| e         | C-H... $\pi$        | 2.53         | 0.3747                                    | e         | LP... $\pi$         | 2.89         | 0.4306                                    |

## Part 10: Catalyst effect

Table S5. Energy barriers associated with stereoselectivity-determining step using guanidine as

|       | catalyst                                                                          |                                                                                    |
|-------|-----------------------------------------------------------------------------------|------------------------------------------------------------------------------------|
|       | $\Delta G^\ddagger$                                                               |                                                                                    |
|       | 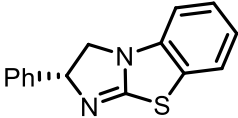 |  |
| TS3RR | 29.8                                                                              | 14.4                                                                               |
| TS3RS | 22.8                                                                              | 13.0                                                                               |
| TS3SR | 17.7                                                                              | 12.7                                                                               |
| TS3SS | 20.7                                                                              | 15.7                                                                               |

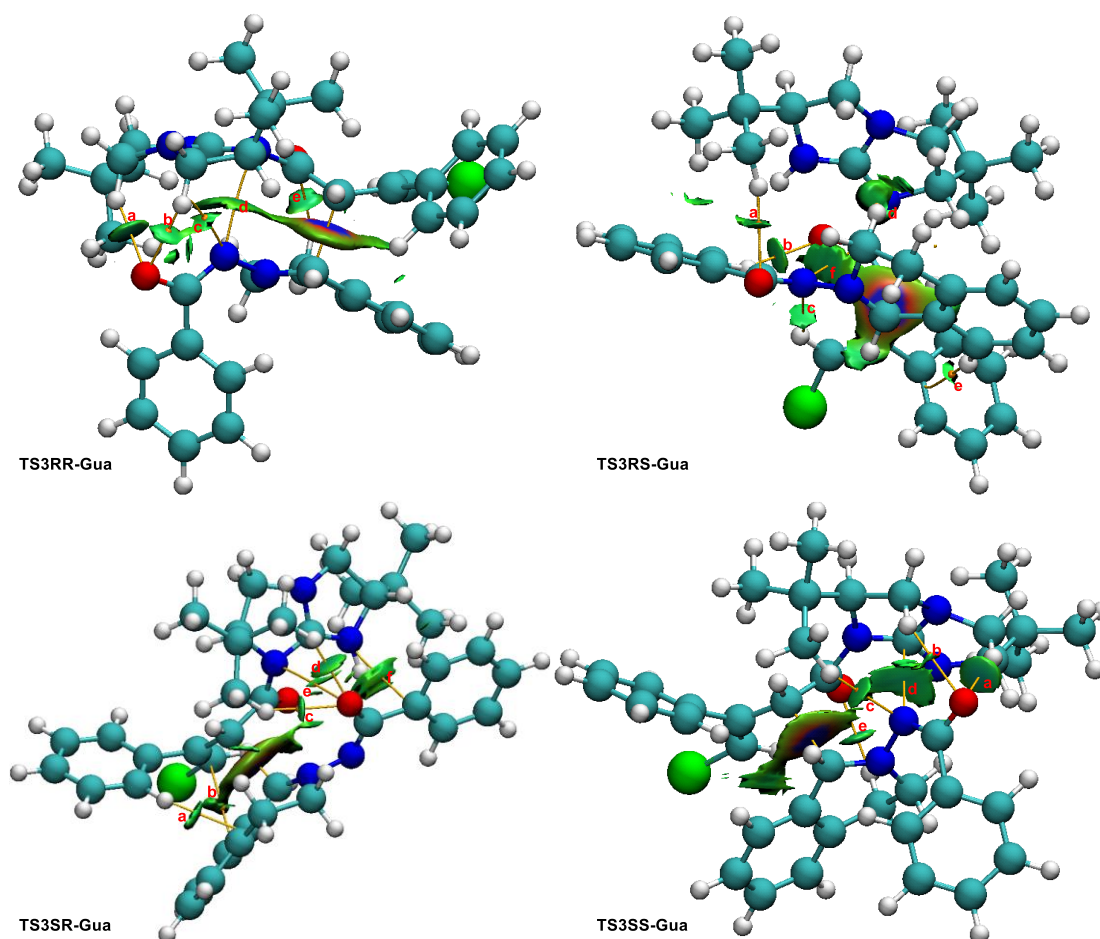

Fig. S4 NCI and AIM analysis for the stereoselective transition states involved in guanidine catalysis

**Table S6.** Quantitative verifications of the weak interactions involved in the stereoselective transition states **TS3RS-Gua** and **TS3SR-Gua**

| <b>TS3RS-Gua</b> |                     |              |                                           | <b>TS3SR-Gua</b> |                     |              |                                           |
|------------------|---------------------|--------------|-------------------------------------------|------------------|---------------------|--------------|-------------------------------------------|
| BCP index        | Type of interaction | Distance (Å) | $\rho_{\text{bcp}} \times 10^{-1}$ (a.u.) | BCP index        | Type of interaction | Distance (Å) | $\rho_{\text{bcp}} \times 10^{-1}$ (a.u.) |
| a                | C-H... $\pi$        | 2.45         | 0.3913                                    | a                | C-H... $\pi$        | 2.57         | 0.4103                                    |
| b                | C-H...O             | 2.26         | 0.4532                                    | b                | C-H... $\pi$        | 2.66         | 0.3512                                    |
| c                | C-H...N             | 2.52         | 0.3278                                    | c                | C-H...O             | 2.42         | 0.3640                                    |
| d                | C-H... $\pi$        | 2.60         | 0.3646                                    | d                | C-H...O             | 2.20         | 0.5155                                    |
| e                | C-H... $\pi$        | 2.76         | 0.2223                                    | e                | LP... $\pi$         | 3.15         | 0.3358                                    |
| f                | LP... $\pi$         | 2.86         | 0.5198                                    | f                | LP... $\pi$         | 3.07         | 0.4622                                    |

**Table S7.** Quantitative verifications of the weak interactions involved in the stereoselective transition states **TS3RR-Gua** and **TS3SS-Gua**

| <b>TS3RR-Gua</b> |                     |              |                                           | <b>TS3SS-Gua</b> |                     |              |                                           |
|------------------|---------------------|--------------|-------------------------------------------|------------------|---------------------|--------------|-------------------------------------------|
| BCP index        | Type of interaction | Distance (Å) | $\rho_{\text{bcp}} \times 10^{-1}$ (a.u.) | BCP index        | Type of interaction | Distance (Å) | $\rho_{\text{bcp}} \times 10^{-1}$ (a.u.) |
| a                | C-H...O             | 2.23         | 0.4793                                    | a                | C-H...O             | 2.20         | 0.4926                                    |
| b                | C-H...O             | 2.39         | 0.3749                                    | b                | C-H...O             | 2.55         | 0.2963                                    |
| c                | C-H...N             | 2.62         | 0.3468                                    | c                | C-H...N             | 2.46         | 0.3322                                    |
| d                | LP... $\pi$         | 2.88         | 0.5093                                    | d                | LP... $\pi$         | 2.96         | 0.4835                                    |
| e                | C-H...O             | 2.32         | 0.4662                                    | e                | C-H...O             | 2.30         | 0.4428                                    |

## Part 11: IRC plots of TS3SR

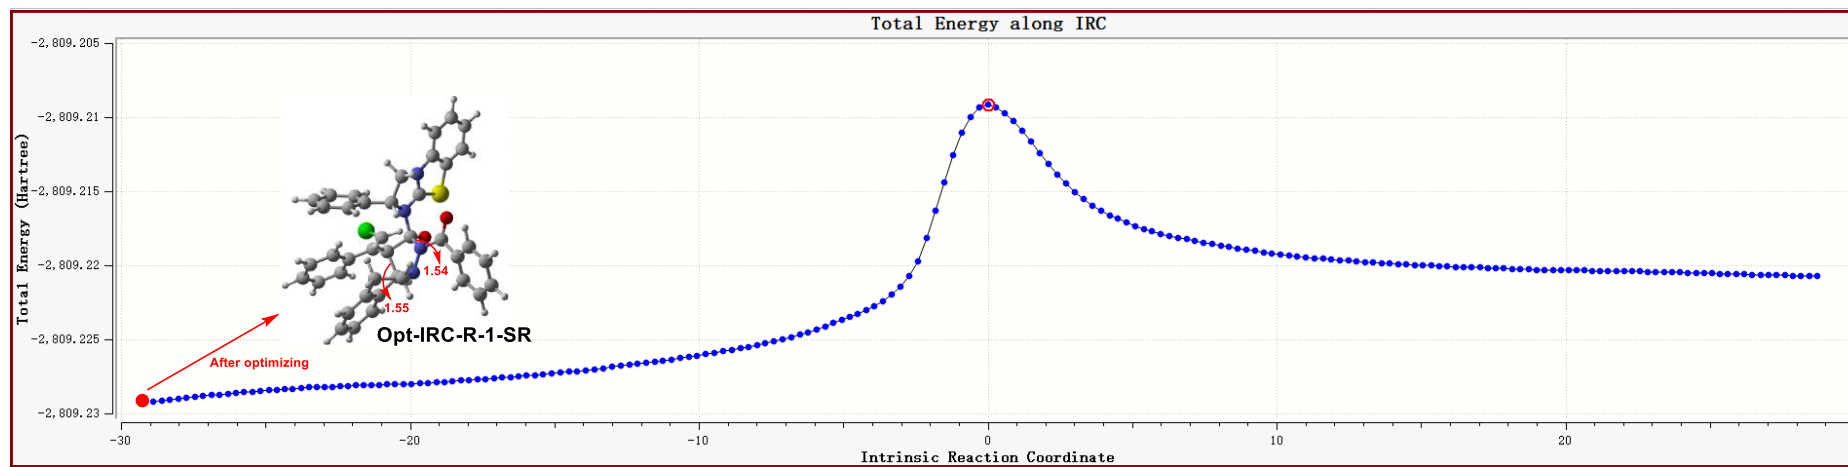

Fig. S5 IRC calculations for TS3SR

---

## Part 12: Cartesian coordinates of all the stationary points involved in the calculations

### R-R1

|    |             |             |             |
|----|-------------|-------------|-------------|
| C  | -0.45338400 | -0.59226900 | 0.16684300  |
| C  | -1.60023400 | 0.33089900  | 0.53143800  |
| C  | -2.46827300 | -0.91853500 | 0.22134400  |
| C  | -1.23433300 | -1.68894700 | -0.01579500 |
| H  | -1.62826500 | 0.69957200  | 1.55790300  |
| H  | -1.03107400 | -2.72951400 | -0.23706900 |
| O  | -3.65454400 | -1.09805800 | 0.16692700  |
| C  | 0.96998100  | -0.31492300 | 0.09208900  |
| C  | 1.45817900  | 0.94075300  | 0.47538600  |
| C  | 1.86334600  | -1.29996800 | -0.35385300 |
| C  | 2.82228900  | 1.20398900  | 0.42147000  |
| H  | 0.76708600  | 1.70727700  | 0.81338500  |
| C  | 3.22364100  | -1.03246700 | -0.40772300 |
| H  | 1.48353900  | -2.26996600 | -0.66083300 |
| C  | 3.70383800  | 0.21943200  | -0.01928500 |
| H  | 3.19726600  | 2.17650900  | 0.72149500  |
| H  | 3.91231600  | -1.79550000 | -0.75427500 |
| H  | 4.76801400  | 0.42698700  | -0.06357000 |
| Cl | -1.87899000 | 1.73419500  | -0.55199600 |

### S-R1

|   |            |             |            |
|---|------------|-------------|------------|
| C | 0.45327200 | -0.59242900 | 0.16680300 |
| C | 1.60018600 | 0.33055500  | 0.53167400 |
| C | 2.46824200 | -0.91872400 | 0.22171400 |

---

|    |             |             |             |
|----|-------------|-------------|-------------|
| C  | 1.23432700  | -1.68894700 | -0.01652200 |
| H  | 1.62886800  | 0.69967300  | 1.55804300  |
| H  | 1.03113700  | -2.72918700 | -0.23934800 |
| O  | 3.65460200  | -1.09802100 | 0.16668700  |
| C  | -0.97008000 | -0.31502500 | 0.09229700  |
| C  | -1.45812300 | 0.94090900  | 0.47498100  |
| C  | -1.86356300 | -1.30013200 | -0.35328800 |
| C  | -2.82219100 | 1.20427200  | 0.42091300  |
| H  | -0.76708900 | 1.70752700  | 0.81280900  |
| C  | -3.22384100 | -1.03252500 | -0.40723300 |
| H  | -1.48384000 | -2.27031200 | -0.65979100 |
| C  | -3.70387800 | 0.21959400  | -0.01937800 |
| H  | -3.19701800 | 2.17698400  | 0.72045400  |
| H  | -3.91261900 | -1.79559300 | -0.75349300 |
| H  | -4.76802100 | 0.42727000  | -0.06386200 |
| Cl | 1.87915700  | 1.73426600  | -0.55176900 |

**R2**

|   |             |             |             |
|---|-------------|-------------|-------------|
| N | -0.78915000 | 0.57057300  | 0.30826200  |
| N | 0.52709000  | 0.18587500  | 0.28013400  |
| C | 1.42526300  | 0.95717800  | -0.23477600 |
| H | 1.05939300  | 1.86266000  | -0.70905100 |
| C | 0.95528300  | -1.01041100 | 1.05497700  |
| H | 0.09927200  | -1.67426000 | 1.11189700  |
| C | 2.13928400  | -1.67387300 | 0.37582200  |
| H | 1.80111300  | -2.08865400 | -0.58235200 |
| C | 3.23593700  | -0.66853300 | 0.13765800  |
| C | 4.58990100  | -0.97908200 | 0.16431000  |
| H | 4.90187000  | -1.99164400 | 0.40264800  |

---

|   |             |             |             |
|---|-------------|-------------|-------------|
| C | 5.54191600  | 0.00157100  | -0.11398300 |
| H | 6.59677000  | -0.25140000 | -0.08586500 |
| C | 5.14915300  | 1.30138800  | -0.43143000 |
| H | 5.89459700  | 2.05835600  | -0.64870900 |
| C | 3.79828900  | 1.62418800  | -0.46924600 |
| H | 3.47737000  | 2.63164700  | -0.71748100 |
| C | 2.84479100  | 0.64494000  | -0.17470600 |
| C | -1.60262800 | -0.39187400 | -0.17923400 |
| O | -1.25215800 | -1.47261700 | -0.68136400 |
| C | -3.06430200 | -0.03870500 | -0.09245700 |
| C | -3.51664000 | 1.14556600  | 0.49499600  |
| C | -3.98800400 | -0.94192100 | -0.61997200 |
| C | -4.87973000 | 1.41891100  | 0.55362100  |
| H | -2.79203200 | 1.84280700  | 0.90061300  |
| C | -5.35103500 | -0.66853300 | -0.56177900 |
| H | -3.61163300 | -1.85428000 | -1.07006800 |
| C | -5.79910200 | 0.51291900  | 0.02583800  |
| H | -5.22744900 | 2.34013200  | 1.01085500  |
| H | -6.06443600 | -1.37565000 | -0.97342700 |
| H | -6.86211900 | 0.72853700  | 0.07225000  |
| H | 1.21505100  | -0.64015300 | 2.05259800  |
| H | 2.49367100  | -2.50467400 | 0.99039500  |

**Isothiourea**

|   |            |             |             |
|---|------------|-------------|-------------|
| C | 4.74373600 | 0.84880900  | -0.73132600 |
| C | 4.20546200 | -0.42905400 | -0.56037600 |
| C | 2.89439200 | -0.54256700 | -0.12900700 |
| C | 2.12395500 | 0.60087100  | 0.14700100  |
| C | 2.65730300 | 1.87275000  | -0.02745700 |



---

|             |             |             |             |
|-------------|-------------|-------------|-------------|
| C           | 3.97485800  | 1.98172700  | -0.47238200 |
| C           | 0.54006000  | -1.07324100 | 0.52957800  |
| C           | -1.37823400 | -0.14655100 | 1.02200400  |
| C           | -0.39542200 | 1.00628300  | 0.62574700  |
| H           | 5.76693200  | 0.95441500  | -1.07400300 |
| H           | 4.79665000  | -1.31363300 | -0.77213700 |
| H           | 2.05787300  | 2.75186800  | 0.18409900  |
| H           | 4.40485500  | 2.96735500  | -0.61540000 |
| H           | -1.53955400 | -0.11173600 | 2.10779300  |
| H           | -0.38776700 | 1.82056800  | 1.35235700  |
| N           | 0.86236800  | 0.27127800  | 0.60941700  |
| S           | 1.96754300  | -2.03621300 | 0.14372900  |
| N           | -0.67547000 | -1.41065200 | 0.70787800  |
| C           | -2.71389300 | -0.01396800 | 0.33002100  |
| C           | -3.70222200 | 0.80114300  | 0.88467100  |
| C           | -2.95518300 | -0.64362700 | -0.89153600 |
| C           | -4.91404900 | 0.99078800  | 0.22605600  |
| H           | -3.52240500 | 1.28679800  | 1.84101200  |
| C           | -4.16941700 | -0.46009300 | -1.54801500 |
| H           | -2.18933700 | -1.28764700 | -1.31244400 |
| C           | -5.15030000 | 0.35908900  | -0.99300200 |
| H           | -5.67563400 | 1.62590400  | 0.66742100  |
| H           | -4.35101300 | -0.95970900 | -2.49450200 |
| H           | -6.09674800 | 0.50076300  | -1.50485700 |
| H           | -0.61910000 | 1.40593400  | -0.37194400 |
| <b>TS1A</b> |             |             |             |
| C           | -6.55111500 | -0.38015300 | -0.32526600 |
| C           | -5.62480000 | -0.93469500 | 0.55947300  |

---

|   |             |             |             |
|---|-------------|-------------|-------------|
| C | -4.27911500 | -0.66368900 | 0.36374000  |
| C | -3.86626500 | 0.15836000  | -0.69578200 |
| C | -4.78254200 | 0.71263000  | -1.58128300 |
| C | -6.13249100 | 0.42959900  | -1.38134000 |
| C | -1.82394500 | -0.38755600 | 0.26264200  |
| C | -0.17943100 | 0.62840000  | -0.89010500 |
| C | -1.53104300 | 0.86905600  | -1.64424200 |
| H | -7.60689700 | -0.58473000 | -0.18740300 |
| H | -5.94853100 | -1.56672700 | 1.37961600  |
| H | -4.45065900 | 1.34413500  | -2.39842000 |
| H | -6.86665900 | 0.84872600  | -2.06079900 |
| H | 0.54421800  | 0.14109600  | -1.54866000 |
| H | -1.58196900 | 0.31942800  | -2.58896900 |
| N | -2.48953600 | 0.31669800  | -0.69089400 |
| S | -2.90303200 | -1.24522300 | 1.33554100  |
| N | -0.53943700 | -0.31026200 | 0.19622700  |
| C | 0.42954800  | 1.89567200  | -0.32820600 |
| C | 1.69679000  | 2.30797500  | -0.73507500 |
| C | -0.26781200 | 2.65303200  | 0.61661900  |
| C | 2.26484100  | 3.46609700  | -0.20613600 |
| H | 2.25137900  | 1.70848200  | -1.45297800 |
| C | 0.29761100  | 3.80773000  | 1.14630900  |
| H | -1.25187000 | 2.33006300  | 0.94988600  |
| C | 1.56676700  | 4.21658500  | 0.73560500  |
| H | 3.25564100  | 3.77437000  | -0.52561900 |
| H | -0.24840300 | 4.38726600  | 1.88359900  |
| H | 2.00862300  | 5.11613900  | 1.15162900  |
| H | -1.71834800 | 1.92969500  | -1.82475000 |
| C | 2.41558500  | -0.96420800 | 0.72545000  |

---

|    |             |             |             |
|----|-------------|-------------|-------------|
| C  | 1.41256900  | -2.07929400 | 0.57321300  |
| C  | 0.45661500  | -1.16547000 | 1.45971500  |
| C  | 1.65440800  | -0.23554200 | 1.56448000  |
| H  | 1.65981600  | -3.00568000 | 1.09512400  |
| H  | 1.83970400  | 0.65261100  | 2.16102700  |
| O  | -0.33663800 | -1.55238700 | 2.32869600  |
| C  | 3.76051700  | -0.81705000 | 0.17610800  |
| C  | 4.37392800  | -1.87623900 | -0.50319200 |
| C  | 4.45241000  | 0.39358200  | 0.32339800  |
| C  | 5.65843300  | -1.72920800 | -1.01878900 |
| H  | 3.84088200  | -2.81477800 | -0.62419100 |
| C  | 5.73389500  | 0.53762800  | -0.19282800 |
| H  | 3.97202200  | 1.22101500  | 0.83845900  |
| C  | 6.33997800  | -0.52434200 | -0.86522200 |
| H  | 6.12779500  | -2.55649000 | -1.54114700 |
| H  | 6.26146800  | 1.47860800  | -0.07379700 |
| H  | 7.34009900  | -0.41052200 | -1.27083100 |
| Cl | 0.94494700  | -2.58403000 | -1.10194300 |

**TS1A'**

|   |            |             |             |
|---|------------|-------------|-------------|
| C | 6.68271600 | -0.21920200 | 0.15038700  |
| C | 5.71136000 | -0.95623400 | -0.52720300 |
| C | 4.37547200 | -0.67863400 | -0.27555900 |
| C | 4.02116800 | 0.32468100  | 0.63723800  |
| C | 4.98170100 | 1.06328800  | 1.31713300  |
| C | 6.32045200 | 0.77504500  | 1.06031100  |
| C | 1.93628300 | -0.43131700 | -0.03092900 |
| C | 0.34002200 | 0.79663800  | 1.01155800  |
| C | 1.73970300 | 1.20304900  | 1.58506900  |

---

|   |             |             |             |
|---|-------------|-------------|-------------|
| H | 7.73119900  | -0.42477700 | -0.03392100 |
| H | 5.99280000  | -1.73127300 | -1.23234800 |
| H | 4.69377500  | 1.83670200  | 2.02100000  |
| H | 7.09127000  | 1.33541500  | 1.57799400  |
| H | -0.31075400 | 0.43928500  | 1.81523100  |
| H | 1.86831900  | 0.89832200  | 2.62727100  |
| N | 2.64065000  | 0.44229500  | 0.72316000  |
| S | 2.94889700  | -1.47009500 | -0.99313600 |
| N | 0.65003900  | -0.33684000 | 0.10320100  |
| C | -0.35635900 | 1.92037100  | 0.27301200  |
| C | -1.64385400 | 2.30954000  | 0.63506000  |
| C | 0.27717200  | 2.55019300  | -0.80151700 |
| C | -2.29906300 | 3.31722300  | -0.06990300 |
| H | -2.14839600 | 1.80414400  | 1.45480300  |
| C | -0.37585200 | 3.55482400  | -1.50737300 |
| H | 1.27801300  | 2.24181900  | -1.09777200 |
| C | -1.66663200 | 3.93928400  | -1.14272500 |
| H | -3.30779800 | 3.60214300  | 0.21204900  |
| H | 0.11874500  | 4.03610000  | -2.34468200 |
| H | -2.17665900 | 4.72110600  | -1.69599000 |
| H | 1.92083500  | 2.27623000  | 1.49240300  |
| C | -2.37151400 | -0.91113100 | -0.36766700 |
| C | -1.40811100 | -1.88680800 | 0.25680100  |
| C | -0.35741300 | -1.34467400 | -0.82080600 |
| C | -1.49915300 | -0.43270600 | -1.27248600 |
| H | -1.17777600 | -1.76471200 | 1.31865900  |
| H | -1.55877300 | 0.35084000  | -2.02312700 |
| O | 0.38179800  | -2.06171600 | -1.53792200 |
| C | -3.74085000 | -0.56931300 | 0.01222100  |

---

|    |             |             |             |
|----|-------------|-------------|-------------|
| C  | -4.39284800 | -1.26866500 | 1.03416500  |
| C  | -4.40417800 | 0.49391300  | -0.61750900 |
| C  | -5.68299400 | -0.91271600 | 1.41843100  |
| H  | -3.88698200 | -2.09737300 | 1.52155400  |
| C  | -5.69110700 | 0.84664100  | -0.23324200 |
| H  | -3.89631600 | 1.04771300  | -1.40232800 |
| C  | -6.33436400 | 0.14376500  | 0.78670400  |
| H  | -6.18060000 | -1.46178900 | 2.21130700  |
| H  | -6.19541000 | 1.67119400  | -0.72709300 |
| H  | -7.34016300 | 0.42004900  | 1.08630500  |
| Cl | -1.80926100 | -3.62861100 | 0.03298000  |

**M1A**

|   |             |             |             |
|---|-------------|-------------|-------------|
| C | -6.50323900 | -0.52475400 | -0.34520300 |
| C | -5.58415300 | -1.00613900 | 0.58689000  |
| C | -4.23976400 | -0.71796300 | 0.39920100  |
| C | -3.82852200 | 0.04701300  | -0.70197700 |
| C | -4.73623300 | 0.52952900  | -1.63648500 |
| C | -6.08260500 | 0.23039200  | -1.44167800 |
| C | -1.81104700 | -0.38723100 | 0.32965900  |
| C | -0.14298000 | 0.63451400  | -0.83899900 |
| C | -1.48140200 | 0.76827100  | -1.63698900 |
| H | -7.55728200 | -0.74235400 | -0.21402700 |
| H | -5.91030400 | -1.59496700 | 1.43767500  |
| H | -4.40270500 | 1.11733400  | -2.48487800 |
| H | -6.81356200 | 0.59404900  | -2.15550600 |
| H | 0.61467500  | 0.13297100  | -1.44502400 |
| H | -1.48185700 | 0.16391100  | -2.54819400 |
| N | -2.45055300 | 0.22834100  | -0.68342500 |

---

|   |             |             |             |
|---|-------------|-------------|-------------|
| S | -2.86628400 | -1.20792700 | 1.42772700  |
| N | -0.51709200 | -0.25430200 | 0.28640600  |
| C | 0.39914300  | 1.95586800  | -0.33787100 |
| C | 1.65362200  | 2.39840300  | -0.75377800 |
| C | -0.34648700 | 2.73425000  | 0.55024500  |
| C | 2.16089000  | 3.61025800  | -0.28899500 |
| H | 2.24444100  | 1.78119900  | -1.42630000 |
| C | 0.15956700  | 3.94314900  | 1.01625000  |
| H | -1.31974400 | 2.38790400  | 0.89156700  |
| C | 1.41487400  | 4.38298700  | 0.59704200  |
| H | 3.14084200  | 3.94485700  | -0.61437900 |
| H | -0.42267500 | 4.54051900  | 1.71011800  |
| H | 1.81038200  | 5.32429600  | 0.96435000  |
| H | -1.70814900 | 1.80780200  | -1.88073100 |
| C | 2.40934400  | -0.90210000 | 0.69962400  |
| C | 1.35457000  | -1.96225600 | 0.57083000  |
| C | 0.38284500  | -0.94851600 | 1.36897300  |
| C | 1.66545700  | -0.10437800 | 1.48668300  |
| H | 1.51858600  | -2.86785700 | 1.15621300  |
| H | 1.89622100  | 0.77877100  | 2.07654600  |
| O | -0.34256500 | -1.33451100 | 2.34348500  |
| C | 3.77744000  | -0.84513200 | 0.18742400  |
| C | 4.37705200  | -1.97770500 | -0.37506400 |
| C | 4.50258200  | 0.35320800  | 0.24761100  |
| C | 5.68164400  | -1.91667500 | -0.85614500 |
| H | 3.81669800  | -2.90658000 | -0.42988400 |
| C | 5.80523300  | 0.41125800  | -0.23225100 |
| H | 4.03087200  | 1.23874800  | 0.66621000  |
| C | 6.39816400  | -0.72426000 | -0.78489200 |

---

|    |            |             |             |
|----|------------|-------------|-------------|
| H  | 6.13903700 | -2.80134400 | -1.28734000 |
| H  | 6.35972700 | 1.34288800  | -0.18029900 |
| H  | 7.41453400 | -0.67697400 | -1.16245100 |
| Cl | 0.92287400 | -2.54543800 | -1.10274600 |

**M1A'**

|   |             |             |             |
|---|-------------|-------------|-------------|
| C | -6.63292500 | -0.41093600 | -0.37465400 |
| C | -5.67426000 | -1.07274500 | 0.39233100  |
| C | -4.34022600 | -0.73164400 | 0.22158000  |
| C | -3.97816800 | 0.26056900  | -0.70006900 |
| C | -4.92547700 | 0.92570900  | -1.46816800 |
| C | -6.26149800 | 0.57346000  | -1.29202500 |
| C | -1.91246200 | -0.36781600 | 0.12300200  |
| C | -0.29711400 | 0.86789200  | -0.90067300 |
| C | -1.68498500 | 1.22099200  | -1.53657100 |
| H | -7.67951600 | -0.66766200 | -0.25512100 |
| H | -5.96364600 | -1.83981900 | 1.10282600  |
| H | -4.62818200 | 1.69070200  | -2.17742800 |
| H | -7.02313400 | 1.07499500  | -1.87897800 |
| H | 0.38275400  | 0.47536200  | -1.66308200 |
| H | -1.76031100 | 0.89943800  | -2.57854500 |
| N | -2.60129500 | 0.44480000  | -0.70357600 |
| S | -2.92318500 | -1.42519900 | 1.05547400  |
| N | -0.62321300 | -0.21950100 | 0.05425800  |
| C | 0.36503800  | 2.03518900  | -0.20098200 |
| C | 1.64175100  | 2.44703100  | -0.57662800 |
| C | -0.28699600 | 2.68161000  | 0.85185700  |
| C | 2.26695500  | 3.49664200  | 0.09336600  |
| H | 2.16044300  | 1.92794700  | -1.37880100 |

---

|    |             |             |             |
|----|-------------|-------------|-------------|
| C  | 0.33700500  | 3.72747600  | 1.52343900  |
| H  | -1.27785200 | 2.35289600  | 1.15923200  |
| C  | 1.61625200  | 4.13583400  | 1.14540500  |
| H  | 3.26580200  | 3.80375100  | -0.20008000 |
| H  | -0.17068800 | 4.22094900  | 2.34562400  |
| H  | 2.10426400  | 4.94870900  | 1.67309700  |
| H  | -1.90338700 | 2.28886500  | -1.46654800 |
| C  | 2.37493800  | -0.88327000 | 0.37658900  |
| C  | 1.32886600  | -1.84015200 | -0.13279300 |
| C  | 0.35187300  | -1.15821900 | 0.94874800  |
| C  | 1.57833700  | -0.29708500 | 1.28738200  |
| H  | 1.06248300  | -1.78297800 | -1.19227000 |
| H  | 1.72616900  | 0.51828900  | 1.99100700  |
| O  | -0.35794000 | -1.80913300 | 1.77078900  |
| C  | 3.74182800  | -0.65638000 | -0.09184000 |
| C  | 4.31860400  | -1.52030400 | -1.03000400 |
| C  | 4.47872100  | 0.44689400  | 0.36228300  |
| C  | 5.60867400  | -1.29087500 | -1.49952500 |
| H  | 3.75380900  | -2.37966700 | -1.38002100 |
| C  | 5.76585100  | 0.67422700  | -0.10847000 |
| H  | 4.02896500  | 1.12975200  | 1.07816700  |
| C  | 6.33479900  | -0.19495900 | -1.04056200 |
| H  | 6.04717500  | -1.97010500 | -2.22352700 |
| H  | 6.32783500  | 1.53190900  | 0.24783000  |
| H  | 7.34044600  | -0.01613300 | -1.40740100 |
| Cl | 1.63060600  | -3.58369800 | 0.20336600  |

**TS2A**

|   |             |             |             |
|---|-------------|-------------|-------------|
| C | -6.36052800 | -0.28955100 | -0.75919400 |
|---|-------------|-------------|-------------|



---

|   |             |             |             |
|---|-------------|-------------|-------------|
| C | -5.59942900 | -0.69399000 | 0.33640000  |
| C | -4.22665300 | -0.49519200 | 0.29240500  |
| C | -3.63109000 | 0.10680400  | -0.82491500 |
| C | -4.38287800 | 0.51078600  | -1.92147000 |
| C | -5.75826100 | 0.30117600  | -1.87233800 |
| C | -1.79210100 | -0.30654700 | 0.49734400  |
| C | 0.06963300  | 0.47326500  | -0.56081500 |
| C | -1.14151400 | 0.52938200  | -1.54332500 |
| H | -7.43402200 | -0.44011000 | -0.74500800 |
| H | -6.06675100 | -1.15724000 | 1.19855900  |
| H | -3.90808100 | 0.97073700  | -2.78111800 |
| H | -6.36932800 | 0.60339600  | -2.71560800 |
| H | 0.88044800  | -0.10869000 | -1.00439400 |
| H | -1.07270600 | -0.24221400 | -2.31617200 |
| N | -2.25754500 | 0.22482700  | -0.64746300 |
| S | -3.02547600 | -0.92466200 | 1.53714200  |
| N | -0.48651200 | -0.26639100 | 0.58968000  |
| C | 0.58121700  | 1.84214900  | -0.15937200 |
| C | 1.49749700  | 2.47970400  | -0.99813300 |
| C | 0.13891200  | 2.48883600  | 0.99428100  |
| C | 1.96389100  | 3.75425000  | -0.69018500 |
| H | 1.85820900  | 1.96762300  | -1.88715300 |
| C | 0.60919300  | 3.76286200  | 1.30354400  |
| H | -0.55651200 | 1.99070500  | 1.66500100  |
| C | 1.51941300  | 4.39855900  | 0.46262500  |
| H | 2.68099900  | 4.23875600  | -1.34500100 |
| H | 0.26682100  | 4.25645600  | 2.20730000  |
| H | 1.88632100  | 5.38980300  | 0.70816600  |
| H | -1.25457000 | 1.51376700  | -1.99920800 |

---

|    |             |             |             |
|----|-------------|-------------|-------------|
| C  | 2.24902500  | -1.22148900 | 0.82456100  |
| C  | 1.27053000  | -2.24116200 | 0.58040300  |
| C  | 0.22872600  | -0.84510600 | 1.76471000  |
| C  | 1.65078600  | -0.48438900 | 1.81260200  |
| H  | 1.14072300  | -3.05961300 | 1.27589100  |
| H  | 2.10184000  | 0.09182200  | 2.61749900  |
| O  | -0.53341200 | -1.12234400 | 2.70414800  |
| C  | 3.53865400  | -0.96610700 | 0.16575500  |
| C  | 4.25718700  | -1.99675600 | -0.45287400 |
| C  | 4.06865900  | 0.33070200  | 0.16204700  |
| C  | 5.48253200  | -1.73550400 | -1.05572200 |
| H  | 3.84980600  | -3.00336700 | -0.44594200 |
| C  | 5.29918800  | 0.58919600  | -0.43356300 |
| H  | 3.49503900  | 1.13449800  | 0.61700400  |
| C  | 6.00743600  | -0.44333300 | -1.04571800 |
| H  | 6.03281600  | -2.54126800 | -1.53125000 |
| H  | 5.70078900  | 1.59777900  | -0.42918500 |
| H  | 6.96423200  | -0.24262900 | -1.51742000 |
| Cl | 0.96747600  | -2.82277500 | -1.09819100 |

**TS2A'**

|   |             |             |             |
|---|-------------|-------------|-------------|
| C | -6.52450200 | -1.42738100 | 0.01152000  |
| C | -5.43529900 | -1.80017300 | 0.79568900  |
| C | -4.20722900 | -1.20448900 | 0.53829400  |
| C | -4.08063300 | -0.25665100 | -0.48654400 |
| C | -5.16235200 | 0.12084000  | -1.27373800 |
| C | -6.38811400 | -0.48088200 | -1.00813400 |
| C | -1.93183400 | -0.33716500 | 0.32440900  |
| C | -0.60707500 | 1.08776600  | -0.89682100 |

---

|   |             |             |             |
|---|-------------|-------------|-------------|
| C | -2.06934600 | 1.12468400  | -1.46020400 |
| H | -7.49176600 | -1.88088900 | 0.19614500  |
| H | -5.54212100 | -2.53665300 | 1.58444300  |
| H | -5.04799200 | 0.85646400  | -2.06228500 |
| H | -7.25165000 | -0.20833000 | -1.60451000 |
| H | 0.08743200  | 0.69137700  | -1.64319400 |
| H | -2.13469400 | 0.77060300  | -2.49083200 |
| N | -2.77026800 | 0.20144500  | -0.56661700 |
| S | -2.65934100 | -1.50141500 | 1.36364700  |
| N | -0.69677000 | 0.11121100  | 0.21539000  |
| C | -0.12572100 | 2.44035800  | -0.42409900 |
| C | 0.91066300  | 3.08803300  | -1.09330000 |
| C | -0.72679700 | 3.05184200  | 0.67813100  |
| C | 1.34211900  | 4.34255900  | -0.66779800 |
| H | 1.38980400  | 2.60385400  | -1.93987200 |
| C | -0.29335200 | 4.30219600  | 1.10541600  |
| H | -1.52597500 | 2.54338900  | 1.21305100  |
| C | 0.74184800  | 4.94967600  | 0.43178200  |
| H | 2.15293100  | 4.83963600  | -1.18983900 |
| H | -0.75904600 | 4.76967600  | 1.96662000  |
| H | 1.08277900  | 5.92307400  | 0.76851300  |
| H | -2.50037100 | 2.12538800  | -1.38617400 |
| C | 2.55088800  | -0.77354200 | 0.07641200  |
| C | 1.65046800  | -1.64389700 | -0.61217600 |
| C | 0.43152400  | -0.55370400 | 0.91765800  |
| C | 1.73935600  | 0.10613300  | 0.74383100  |
| H | 1.12033100  | -1.29419500 | -1.48935500 |
| H | 1.93147800  | 1.15189000  | 0.98020500  |
| O | 0.04674900  | -1.32036300 | 1.80856200  |

---

|    |            |             |             |
|----|------------|-------------|-------------|
| C  | 4.02563400 | -0.74696500 | 0.05715300  |
| C  | 4.74329100 | -1.26495200 | -1.02804100 |
| C  | 4.72996300 | -0.15752200 | 1.11360000  |
| C  | 6.13131000 | -1.18851300 | -1.05744200 |
| H  | 4.19880000 | -1.72124700 | -1.84931100 |
| C  | 6.11814900 | -0.07055700 | 1.07987700  |
| H  | 4.17410700 | 0.21474700  | 1.96972200  |
| C  | 6.82253200 | -0.58813300 | -0.00529600 |
| H  | 6.67678300 | -1.59412200 | -1.90401000 |
| H  | 6.65166100 | 0.39090500  | 1.90511600  |
| H  | 7.90619600 | -0.52941100 | -0.02942100 |
| Cl | 2.05959300 | -3.37862300 | -0.82260900 |

**M2**

|   |             |             |             |
|---|-------------|-------------|-------------|
| C | -6.91981700 | -0.78569600 | 0.30710000  |
| C | -5.81101000 | -1.60476700 | 0.50732300  |
| C | -4.55644000 | -1.10132300 | 0.19066300  |
| C | -4.42166700 | 0.19808100  | -0.31729900 |
| C | -5.52225400 | 1.02192500  | -0.52037400 |
| C | -6.77529800 | 0.50887200  | -0.19918100 |
| C | -2.23009500 | -0.50179100 | -0.27483100 |
| C | -0.88360200 | 1.19850200  | -1.02787700 |
| C | -2.38138200 | 1.65333000  | -1.09660100 |
| H | -7.90800900 | -1.16072900 | 0.54833900  |
| H | -5.92319400 | -2.60927500 | 0.90044300  |
| H | -5.40286700 | 2.02483200  | -0.91536000 |
| H | -7.65357500 | 1.12756800  | -0.34700600 |
| H | -0.45172500 | 1.16784400  | -2.03220100 |
| H | -2.70674800 | 1.85648600  | -2.11885200 |

---

|   |             |             |             |
|---|-------------|-------------|-------------|
| N | -3.08451900 | 0.48752600  | -0.56424700 |
| S | -2.98397900 | -1.91977400 | 0.35355100  |
| N | -0.97498600 | -0.19493600 | -0.52374600 |
| C | -0.03324400 | 2.08288300  | -0.13998700 |
| C | 0.84729000  | 2.99427200  | -0.71921000 |
| C | -0.13128400 | 2.00312900  | 1.25024200  |
| C | 1.62962100  | 3.82225500  | 0.08407800  |
| H | 0.93644300  | 3.04490500  | -1.80134500 |
| C | 0.65259100  | 2.82648600  | 2.05194700  |
| H | -0.80239800 | 1.27932900  | 1.70657800  |
| C | 1.53458500  | 3.73781700  | 1.47008400  |
| H | 2.32074200  | 4.52217100  | -0.37410600 |
| H | 0.58196100  | 2.75130400  | 3.13203600  |
| H | 2.14985800  | 4.37416100  | 2.09779900  |
| H | -2.56696900 | 2.52812300  | -0.46938700 |
| C | 2.60163400  | -1.38901300 | -0.26387800 |
| C | 2.62565300  | -2.68899300 | 0.09280400  |
| C | 0.11323800  | -1.15880100 | -0.26517200 |
| C | 1.36613400  | -0.69986000 | -0.59158100 |
| H | 1.73562300  | -3.29890400 | 0.11897500  |
| H | 1.47124200  | 0.28428500  | -1.02330200 |
| O | -0.29515800 | -2.23277700 | 0.23002900  |
| C | 3.81363400  | -0.51723900 | -0.29636600 |
| C | 4.99989300  | -0.90819200 | -0.92536400 |
| C | 3.74673600  | 0.76063700  | 0.27459500  |
| C | 6.09598800  | -0.05084400 | -0.96746100 |
| H | 5.05595900  | -1.88511500 | -1.39447600 |
| C | 4.84405900  | 1.61521900  | 0.23842000  |
| H | 2.82228100  | 1.08050400  | 0.75084400  |

---

|    |            |             |             |
|----|------------|-------------|-------------|
| C  | 6.02445400 | 1.21153800  | -0.38201900 |
| H  | 7.00724900 | -0.36819100 | -1.46514100 |
| H  | 4.77135900 | 2.59911400  | 0.69300400  |
| H  | 6.88128800 | 1.87720500  | -0.41485700 |
| Cl | 4.04861400 | -3.53151300 | 0.68509300  |

**TS1B**

|    |             |             |             |
|----|-------------|-------------|-------------|
| C  | 0.60671100  | -0.38957800 | 0.47980100  |
| C  | 1.61166400  | 0.59580400  | 0.50139400  |
| C  | 2.50997100  | -1.24158200 | 0.07866100  |
| C  | 1.30274300  | -1.61316700 | 0.61989700  |
| H  | 2.25675100  | 0.71607800  | 1.35946400  |
| H  | 1.02855000  | -2.55579300 | 1.07704200  |
| O  | 3.50112600  | -1.35371000 | -0.53947500 |
| C  | -0.82618200 | -0.26146600 | 0.20134700  |
| C  | -1.51246700 | 0.92055100  | 0.51238800  |
| C  | -1.53253100 | -1.35083200 | -0.32397100 |
| C  | -2.88204500 | 1.00709100  | 0.29820600  |
| H  | -0.97001200 | 1.75787800  | 0.93891600  |
| C  | -2.90367100 | -1.26170800 | -0.53421000 |
| H  | -0.99388200 | -2.25708000 | -0.58432500 |
| C  | -3.57810600 | -0.08191900 | -0.22619200 |
| H  | -3.41013600 | 1.92209900  | 0.54440400  |
| H  | -3.44440700 | -2.10738800 | -0.94576500 |
| H  | -4.64758300 | -0.00946600 | -0.39566800 |
| Cl | 1.49383500  | 2.08377600  | -0.43071800 |

**TS1B'**

|   |             |             |            |
|---|-------------|-------------|------------|
| C | -0.60772600 | -0.38972500 | 0.47918400 |
|---|-------------|-------------|------------|

---

|    |             |             |             |
|----|-------------|-------------|-------------|
| C  | -1.60774900 | 0.59965300  | 0.50076100  |
| C  | -2.51474900 | -1.23001200 | 0.07749100  |
| C  | -1.30729600 | -1.60978300 | 0.61598700  |
| H  | -2.26090600 | 0.71868200  | 1.35279300  |
| H  | -1.03523700 | -2.55923100 | 1.06035600  |
| O  | -3.51326100 | -1.34929400 | -0.52797400 |
| C  | 0.82531600  | -0.26375400 | 0.20220500  |
| C  | 1.51308500  | 0.91599800  | 0.51829800  |
| C  | 1.52939500  | -1.35171700 | -0.32859100 |
| C  | 2.88285000  | 1.00118400  | 0.30515300  |
| H  | 0.97078100  | 1.75292500  | 0.94618200  |
| C  | 2.90075700  | -1.26383400 | -0.53819600 |
| H  | 0.98894700  | -2.25538400 | -0.59427900 |
| C  | 3.57720800  | -0.08687000 | -0.22367600 |
| H  | 3.41244200  | 1.91430000  | 0.55510000  |
| H  | 3.43985500  | -2.10826400 | -0.95446100 |
| H  | 4.64694800  | -0.01560100 | -0.39192800 |
| Cl | -1.48254600 | 2.08353500  | -0.43539200 |

**M1B**

|   |             |             |             |
|---|-------------|-------------|-------------|
| C | -0.79677000 | -0.03035300 | 0.32428600  |
| C | -1.41869200 | 1.14793100  | 0.16681100  |
| C | -2.80703900 | -1.41291400 | 0.16945800  |
| C | -1.60061200 | -1.21916500 | 0.67317200  |
| H | -2.47316900 | 1.28110100  | 0.37372200  |
| H | -1.21097200 | -1.99122300 | 1.32657700  |
| O | -3.86510400 | -1.58233900 | -0.28177100 |
| C | 0.66119200  | -0.26261100 | 0.15376400  |
| C | 1.60563700  | 0.61245400  | 0.70205800  |

---

|    |             |             |             |
|----|-------------|-------------|-------------|
| C  | 1.10483100  | -1.40160700 | -0.52691500 |
| C  | 2.96552800  | 0.36142200  | 0.55317400  |
| H  | 1.27136500  | 1.48119200  | 1.25925300  |
| C  | 2.46537100  | -1.64609800 | -0.68338300 |
| H  | 0.37416600  | -2.09046600 | -0.94036600 |
| C  | 3.39921400  | -0.76437400 | -0.14395800 |
| H  | 3.68816100  | 1.04452800  | 0.98763500  |
| H  | 2.79541700  | -2.52726900 | -1.22404500 |
| H  | 4.46081300  | -0.95708900 | -0.26055200 |
| Cl | -0.67393500 | 2.59469600  | -0.44699100 |

**TS2B**

|   |             |             |             |
|---|-------------|-------------|-------------|
| C | -7.11846500 | -0.81680700 | 0.20127100  |
| C | -6.00660300 | -1.65510900 | 0.30051800  |
| C | -4.75443000 | -1.12342800 | 0.03797500  |
| C | -4.60719500 | 0.22402600  | -0.32944600 |
| C | -5.71201000 | 1.06211200  | -0.42529000 |
| C | -6.96857000 | 0.52366800  | -0.15233700 |
| C | -2.38050900 | -0.46314800 | -0.32001200 |
| C | -1.08594800 | 1.25794200  | -0.84927100 |
| C | -2.55135700 | 1.79131900  | -0.70002200 |
| H | -8.10577700 | -1.21579200 | 0.40507000  |
| H | -6.11815700 | -2.69652900 | 0.58288000  |
| H | -5.59144600 | 2.10282200  | -0.70625500 |
| H | -7.84283700 | 1.16224500  | -0.21861400 |
| H | -0.80098200 | 1.27712500  | -1.90882300 |
| H | -2.87456400 | 2.37037100  | -1.56633800 |
| N | -3.28256700 | 0.53484300  | -0.58291500 |
| S | -3.18707300 | -1.96084700 | 0.11954300  |



---

|   |             |             |             |
|---|-------------|-------------|-------------|
| N | -1.14002700 | -0.15627400 | -0.41669700 |
| C | -0.08100000 | 2.06602200  | -0.05950200 |
| C | 0.73984500  | 2.99021100  | -0.70364500 |
| C | 0.01551200  | 1.91200100  | 1.32626700  |
| C | 1.63658500  | 3.76831300  | 0.02743900  |
| H | 0.67975300  | 3.10094600  | -1.78332500 |
| C | 0.91142600  | 2.68595800  | 2.05707200  |
| H | -0.60455300 | 1.17061700  | 1.82356400  |
| C | 1.72046600  | 3.62021000  | 1.40890600  |
| H | 2.27268700  | 4.48353100  | -0.48437100 |
| H | 0.98396100  | 2.55735400  | 3.13229000  |
| H | 2.41904100  | 4.22315500  | 1.98067000  |
| H | -2.67599500 | 2.39042100  | 0.20993800  |
| C | 2.82973000  | -1.49023800 | -0.19963300 |
| C | 3.04978300  | -2.78223500 | 0.09635800  |
| C | 0.40790100  | -1.63548300 | 0.08912900  |
| C | 1.46532100  | -0.98334600 | -0.40472300 |
| H | 2.25336800  | -3.51453500 | 0.13655700  |
| H | 1.31383400  | -0.03788400 | -0.89859300 |
| O | -0.21987400 | -2.47715500 | 0.61612900  |
| C | 3.89384700  | -0.45519700 | -0.31825300 |
| C | 5.08272500  | -0.70693000 | -1.01206300 |
| C | 3.68382400  | 0.81791300  | 0.22521200  |
| C | 6.05224900  | 0.28328700  | -1.13365300 |
| H | 5.23799300  | -1.67753200 | -1.47082100 |
| C | 4.65896800  | 1.80425600  | 0.11039500  |
| H | 2.75221300  | 1.03340800  | 0.74367400  |
| C | 5.84723800  | 1.53951900  | -0.56618900 |
| H | 6.96697400  | 0.07464800  | -1.67932600 |

---

|    |            |             |             |
|----|------------|-------------|-------------|
| H  | 4.48072900 | 2.78270900  | 0.54638000  |
| H  | 6.60568400 | 2.31013400  | -0.66136500 |
| Cl | 4.58720000 | -3.45679100 | 0.57255000  |

**TS3RR**

|   |             |             |             |
|---|-------------|-------------|-------------|
| C | 7.19878400  | -0.77862000 | -1.28577200 |
| C | 6.13096200  | 0.09478100  | -1.46710800 |
| C | 4.84767500  | -0.37618200 | -1.21431100 |
| C | 4.65129700  | -1.69523000 | -0.78649800 |
| C | 5.71197300  | -2.57571500 | -0.60509700 |
| C | 6.99095400  | -2.09561200 | -0.86178200 |
| C | 2.49966500  | -0.90315100 | -0.81864900 |
| C | 1.06355900  | -2.63685600 | -0.27377900 |
| C | 2.54429800  | -3.13625300 | -0.22215300 |
| H | 8.20775200  | -0.42964000 | -1.47472400 |
| H | 6.29318200  | 1.11601000  | -1.79399500 |
| H | 5.54257900  | -3.59333900 | -0.27058800 |
| H | 7.84078300  | -2.75529200 | -0.72622200 |
| H | 0.52455700  | -3.12206000 | -1.09342400 |
| H | 2.73637500  | -3.94418600 | -0.93045400 |
| N | 3.29760300  | -1.94582400 | -0.60052700 |
| S | 3.31848500  | 0.49899900  | -1.38051200 |
| N | 1.21143400  | -1.19345400 | -0.62879500 |
| C | 0.34278000  | -2.87878500 | 1.02979600  |
| C | -0.82105900 | -3.64765500 | 1.05126500  |
| C | 0.85497700  | -2.34493300 | 2.21476600  |
| C | -1.48246800 | -3.88187500 | 2.25532700  |
| H | -1.21690100 | -4.05629200 | 0.12388100  |
| C | 0.19177400  | -2.58290000 | 3.41496700  |

---

|    |             |             |             |
|----|-------------|-------------|-------------|
| H  | 1.71681400  | -1.68011500 | 2.18770400  |
| C  | -0.97347100 | -3.34811500 | 3.43769500  |
| H  | -2.38950300 | -4.47740700 | 2.26777600  |
| H  | 0.57605700  | -2.14983800 | 4.33239800  |
| H  | -1.48801500 | -3.52397600 | 4.37694800  |
| H  | 2.82178300  | -3.45310800 | 0.78525600  |
| C  | -2.19960900 | 0.16484800  | -1.53401900 |
| C  | -2.06436700 | 1.45857200  | -1.87702100 |
| C  | 0.20651900  | -0.21806100 | -0.96061100 |
| C  | -1.16895500 | -0.54230300 | -0.75117700 |
| H  | -1.18133100 | 2.03744600  | -1.65816100 |
| H  | -1.39159000 | -1.58731800 | -0.56435300 |
| O  | 0.64859200  | 0.84915700  | -1.38403300 |
| C  | -3.40784800 | -0.63880000 | -1.87943300 |
| C  | -4.69566500 | -0.18535100 | -1.57976600 |
| C  | -3.25960800 | -1.89037500 | -2.48775700 |
| C  | -5.80831400 | -0.96003600 | -1.88999100 |
| H  | -4.81658500 | 0.76439600  | -1.06706000 |
| C  | -4.37291300 | -2.66215200 | -2.80900700 |
| H  | -2.26178500 | -2.25304600 | -2.72096500 |
| C  | -5.65184200 | -2.19773000 | -2.51103100 |
| H  | -6.80017700 | -0.59903000 | -1.63557200 |
| H  | -4.24091600 | -3.62596500 | -3.29064300 |
| H  | -6.52131100 | -2.79958700 | -2.75587800 |
| Cl | -3.22585100 | 2.35549500  | -2.83283500 |
| N  | 0.67115000  | 0.61156400  | 1.92788100  |
| N  | -0.57905300 | 1.12304200  | 1.55409400  |
| C  | -1.43321900 | 0.12264500  | 1.26552100  |
| H  | -1.08288100 | -0.85411700 | 1.57944200  |

---

|   |             |             |             |
|---|-------------|-------------|-------------|
| C | -1.10715100 | 2.35639900  | 2.15747800  |
| H | -0.34170500 | 3.12782500  | 2.10360900  |
| C | -2.37689500 | 2.79187200  | 1.43627700  |
| H | -2.13317600 | 3.05642300  | 0.39886100  |
| C | -3.37869400 | 1.66587300  | 1.46068900  |
| C | -4.74809500 | 1.86188000  | 1.62908900  |
| H | -5.13669300 | 2.87414700  | 1.70039800  |
| C | -5.61147400 | 0.77238600  | 1.73340400  |
| H | -6.67490700 | 0.93930600  | 1.87331500  |
| C | -5.11090300 | -0.52773100 | 1.67465500  |
| H | -5.78247700 | -1.37554500 | 1.76056600  |
| C | -3.74839700 | -0.73352500 | 1.49601400  |
| H | -3.34013400 | -1.74085900 | 1.44145800  |
| C | -2.88241900 | 0.35696500  | 1.38598400  |
| C | 1.81398100  | 1.20646500  | 1.59348100  |
| O | 2.88549900  | 0.58027900  | 1.80704200  |
| C | 1.98039300  | 2.61062100  | 1.02179400  |
| C | 1.07837100  | 3.26851600  | 0.17852900  |
| C | 3.17557600  | 3.26261600  | 1.34862600  |
| C | 1.36254700  | 4.53922400  | -0.31705900 |
| H | 0.16433100  | 2.77022300  | -0.11454000 |
| C | 3.45413500  | 4.53871400  | 0.87084800  |
| H | 3.88352900  | 2.73358400  | 1.97664100  |
| C | 2.54694600  | 5.18269100  | 0.03122500  |
| H | 0.65366900  | 5.02402200  | -0.98179700 |
| H | 4.38243600  | 5.02961500  | 1.14771000  |
| H | 2.76294500  | 6.17564800  | -0.35138900 |
| H | -1.31857100 | 2.15585700  | 3.21699900  |
| H | -2.78791400 | 3.68329800  | 1.91808600  |

---

**TS3RS**

|   |             |             |             |
|---|-------------|-------------|-------------|
| C | -6.90280800 | 2.09031000  | -1.10656400 |
| C | -5.76670800 | 1.80545900  | -1.85909400 |
| C | -4.53038800 | 1.85641900  | -1.22757600 |
| C | -4.44437800 | 2.18649800  | 0.13176000  |
| C | -5.57294400 | 2.47881600  | 0.88843300  |
| C | -6.80566300 | 2.42410300  | 0.24787000  |
| C | -2.24130400 | 1.85059700  | -0.39617300 |
| C | -0.98541000 | 2.04324900  | 1.52837000  |
| C | -2.43710200 | 2.56108600  | 1.78393900  |
| H | -7.87691100 | 2.05061900  | -1.58099400 |
| H | -5.84346800 | 1.54725200  | -2.90943600 |
| H | -5.48858800 | 2.73424800  | 1.93902200  |
| H | -7.70563100 | 2.64391900  | 0.81128900  |
| H | -0.25369300 | 2.82746800  | 1.73627400  |
| H | -2.48055200 | 3.64679700  | 1.90183500  |
| N | -3.12033100 | 2.17732800  | 0.54956900  |
| S | -2.93333400 | 1.58581600  | -1.94107100 |
| N | -0.99585500 | 1.81395400  | 0.05507500  |
| C | -0.67163200 | 0.82282900  | 2.37040000  |
| C | 0.47180800  | 0.81203000  | 3.16856000  |
| C | -1.55966700 | -0.25571200 | 2.41519100  |
| C | 0.73402200  | -0.26974500 | 4.00858900  |
| H | 1.16538000  | 1.64920100  | 3.12949800  |
| C | -1.30507700 | -1.32548600 | 3.26705700  |
| H | -2.43100000 | -0.27549100 | 1.76107800  |
| C | -0.15973600 | -1.33555500 | 4.06454100  |
| H | 1.62901200  | -0.27116100 | 4.62216600  |

---

|    |             |             |             |
|----|-------------|-------------|-------------|
| H  | -1.99535600 | -2.16324800 | 3.29651000  |
| H  | 0.03593800  | -2.17433100 | 4.72508000  |
| H  | -2.89091300 | 2.07496000  | 2.64805400  |
| C  | 2.58531400  | 1.66753600  | -0.73574900 |
| C  | 2.74427000  | 2.14841400  | -1.98179600 |
| C  | 0.09145000  | 1.52363700  | -0.84917200 |
| C  | 1.32387300  | 1.04121200  | -0.29511700 |
| H  | 1.96107300  | 2.11828100  | -2.72524400 |
| H  | 1.29717700  | 0.82821100  | 0.76695200  |
| O  | -0.13868400 | 1.75755100  | -2.03401100 |
| C  | 3.64875800  | 1.74622700  | 0.30904800  |
| C  | 3.97300700  | 0.63160900  | 1.09143300  |
| C  | 4.28484200  | 2.96292100  | 0.58215100  |
| C  | 4.93120500  | 0.72429700  | 2.09715800  |
| H  | 3.48275000  | -0.31827100 | 0.90200300  |
| C  | 5.23596200  | 3.05757800  | 1.59323100  |
| H  | 4.01978600  | 3.84216600  | 0.00411400  |
| C  | 5.56763500  | 1.93663200  | 2.35128500  |
| H  | 5.18009200  | -0.15571200 | 2.68230000  |
| H  | 5.71510000  | 4.01122000  | 1.79162700  |
| H  | 6.31220400  | 2.01035300  | 3.13763300  |
| Cl | 4.24523200  | 2.79293200  | -2.60938400 |
| N  | -0.94363000 | -0.90731100 | -0.62317400 |
| N  | 0.27867900  | -1.57713700 | -0.60636800 |
| C  | 1.25148500  | -0.91967100 | -1.25826300 |
| H  | 0.93301300  | -0.40115600 | -2.16120200 |
| C  | 0.67305600  | -2.20145300 | 0.66511800  |
| H  | -0.19596200 | -2.71271500 | 1.07607400  |
| C  | 1.81469800  | -3.17552600 | 0.43862600  |

---

|              |             |             |             |
|--------------|-------------|-------------|-------------|
| H            | 1.43276100  | -4.04085200 | -0.12020200 |
| C            | 2.92738300  | -2.53378700 | -0.34895700 |
| C            | 4.23797500  | -2.99993200 | -0.27833800 |
| H            | 4.47342800  | -3.81383100 | 0.40246600  |
| C            | 5.23745100  | -2.43898900 | -1.06956400 |
| H            | 6.25664600  | -2.80430500 | -0.99448500 |
| C            | 4.91983200  | -1.42757800 | -1.97317300 |
| H            | 5.68532900  | -1.00539700 | -2.61570700 |
| C            | 3.61395200  | -0.95873200 | -2.05733800 |
| H            | 3.36161800  | -0.18401600 | -2.77144000 |
| C            | 2.61802900  | -1.47395200 | -1.21893000 |
| C            | -2.05518100 | -1.61995000 | -0.44694100 |
| O            | -3.15002900 | -1.04766900 | -0.22255700 |
| C            | -2.07411800 | -3.13571900 | -0.50075200 |
| C            | -1.30224200 | -3.87837100 | -1.39985500 |
| C            | -2.95135200 | -3.80565300 | 0.35541500  |
| C            | -1.39536700 | -5.26803100 | -1.42506200 |
| H            | -0.63314500 | -3.36655200 | -2.08323400 |
| C            | -3.03162600 | -5.19515700 | 0.34403300  |
| H            | -3.57375500 | -3.21243600 | 1.01813400  |
| C            | -2.25107500 | -5.92993900 | -0.54677300 |
| H            | -0.80105600 | -5.83529700 | -2.13492800 |
| H            | -3.70890200 | -5.70525800 | 1.02230400  |
| H            | -2.31619800 | -7.01343700 | -0.56303700 |
| H            | 0.95969200  | -1.40036700 | 1.36680900  |
| H            | 2.18282300  | -3.54578100 | 1.40002900  |
| <b>TS3SR</b> |             |             |             |
| C            | 7.00040600  | -1.32570400 | 1.56132900  |

---

|   |             |             |             |
|---|-------------|-------------|-------------|
| C | 5.84605200  | -1.14773200 | 2.31794900  |
| C | 4.61917300  | -1.30657900 | 1.68493700  |
| C | 4.55785200  | -1.64274400 | 0.32731600  |
| C | 5.70636600  | -1.82151600 | -0.43497100 |
| C | 6.92949700  | -1.65448300 | 0.20326400  |
| C | 2.33600200  | -1.50363200 | 0.84653300  |
| C | 1.12068700  | -1.62736800 | -1.09246900 |
| C | 2.62343100  | -1.91621300 | -1.40037800 |
| H | 7.96876300  | -1.20242900 | 2.03306900  |
| H | 5.90061800  | -0.88604700 | 3.36887500  |
| H | 5.64249900  | -2.07569100 | -1.48714300 |
| H | 7.84498100  | -1.78168800 | -0.36381200 |
| H | 0.87268600  | -0.62492100 | -1.45686300 |
| H | 3.04233800  | -1.16567100 | -2.07119900 |
| N | 3.24027300  | -1.76820700 | -0.08569900 |
| S | 3.00059100  | -1.12254000 | 2.38387800  |
| N | 1.08650800  | -1.54183300 | 0.38827700  |
| C | 0.17428900  | -2.66274300 | -1.64796300 |
| C | -0.50121400 | -2.39678700 | -2.83899100 |
| C | -0.02211600 | -3.88550500 | -1.00258800 |
| C | -1.36196100 | -3.34564100 | -3.38667700 |
| H | -0.36157600 | -1.43777200 | -3.33199500 |
| C | -0.89080200 | -4.82893000 | -1.54365400 |
| H | 0.49127200  | -4.08810900 | -0.06631200 |
| C | -1.56057500 | -4.56160000 | -2.73773700 |
| H | -1.88775400 | -3.12767200 | -4.31065400 |
| H | -1.04954200 | -5.77215100 | -1.03136800 |
| H | -2.24040400 | -5.29706200 | -3.15559600 |
| H | 2.78254100  | -2.92820300 | -1.78129100 |



---

|    |             |             |             |
|----|-------------|-------------|-------------|
| C  | -2.49579700 | -0.87789700 | 1.16139900  |
| C  | -2.67492400 | -0.88972900 | 2.49296400  |
| C  | 0.01621800  | -1.01258800 | 1.19479300  |
| C  | -1.18934400 | -0.61377100 | 0.54003800  |
| H  | -1.87388900 | -0.73133800 | 3.19953300  |
| H  | -1.19303200 | -0.71849200 | -0.53889500 |
| O  | 0.25046700  | -0.95015900 | 2.40412900  |
| C  | -3.60136400 | -1.08295100 | 0.17949600  |
| C  | -3.45949800 | -2.05669200 | -0.81668100 |
| C  | -4.74852600 | -0.28496500 | 0.18804200  |
| C  | -4.45009900 | -2.23657300 | -1.77723700 |
| H  | -2.56918000 | -2.68090400 | -0.83237700 |
| C  | -5.73193900 | -0.45495700 | -0.78307200 |
| H  | -4.85516600 | 0.48373900  | 0.94715100  |
| C  | -5.58818100 | -1.43232500 | -1.76572300 |
| H  | -4.32480500 | -3.00250700 | -2.53690000 |
| H  | -6.61024500 | 0.18343700  | -0.77351200 |
| H  | -6.35732100 | -1.56445600 | -2.52032800 |
| Cl | -4.20899600 | -1.23468200 | 3.26556200  |
| N  | 1.07105700  | 1.20515200  | -0.11025800 |
| N  | -0.11677800 | 1.92723200  | -0.12181100 |
| C  | -0.97763500 | 1.53366300  | 0.82615700  |
| H  | -0.53455600 | 1.29628200  | 1.79242400  |
| C  | -0.62582000 | 2.46703900  | -1.39999400 |
| H  | 0.01099800  | 2.05513600  | -2.18674400 |
| C  | -2.09143400 | 2.11033500  | -1.63724300 |
| H  | -2.19197300 | 1.03409800  | -1.83828900 |
| C  | -2.90296700 | 2.45202700  | -0.41740000 |
| C  | -4.16194500 | 3.03932700  | -0.45230900 |

---

|              |             |             |             |
|--------------|-------------|-------------|-------------|
| H            | -4.60686600 | 3.29778900  | -1.40929500 |
| C            | -4.85289700 | 3.28793800  | 0.73419900  |
| H            | -5.83494300 | 3.74907900  | 0.69951200  |
| C            | -4.28740300 | 2.94452100  | 1.96079200  |
| H            | -4.82643600 | 3.13449000  | 2.88292600  |
| C            | -3.02496900 | 2.35737900  | 2.00300200  |
| H            | -2.57336000 | 2.08885400  | 2.95331100  |
| C            | -2.32855900 | 2.11960000  | 0.81692700  |
| C            | 2.18362500  | 1.74431300  | -0.61043500 |
| O            | 3.17983900  | 1.01870600  | -0.83996500 |
| C            | 2.31857600  | 3.22460000  | -0.89821100 |
| C            | 1.73740000  | 4.20731900  | -0.09147200 |
| C            | 3.12229700  | 3.61338300  | -1.97200100 |
| C            | 1.94099800  | 5.55633900  | -0.37096000 |
| H            | 1.12778800  | 3.91308100  | 0.75727000  |
| C            | 3.31162600  | 4.96047200  | -2.26381400 |
| H            | 3.59817600  | 2.83850600  | -2.56417900 |
| C            | 2.71956400  | 5.93562400  | -1.46299000 |
| H            | 1.49393500  | 6.31276500  | 0.26662200  |
| H            | 3.92607300  | 5.25138200  | -3.11025900 |
| H            | 2.87079400  | 6.98769100  | -1.68385500 |
| H            | -0.49757000 | 3.55500800  | -1.39919400 |
| H            | -2.45578100 | 2.64372400  | -2.51911800 |
| <b>TS3SS</b> |             |             |             |
| C            | 6.36289100  | -2.32465600 | 1.52403100  |
| C            | 5.29403400  | -1.74663800 | 2.20186000  |
| C            | 4.03812700  | -1.80404400 | 1.60961200  |
| C            | 3.86243200  | -2.43660200 | 0.37433700  |

---

|   |             |             |             |
|---|-------------|-------------|-------------|
| C | 4.92503400  | -3.01451400 | -0.30941700 |
| C | 6.17960500  | -2.94576700 | 0.28332100  |
| C | 1.73335800  | -1.73783700 | 0.81593700  |
| C | 0.42971200  | -2.10862600 | -1.03874900 |
| C | 1.88605900  | -2.60311500 | -1.30851100 |
| H | 7.35291500  | -2.28839300 | 1.96460500  |
| H | 5.43674500  | -1.26103400 | 3.16091500  |
| H | 4.77465600  | -3.49056800 | -1.27196900 |
| H | 7.03103300  | -3.38303600 | -0.22629500 |
| H | 0.23987500  | -1.23963900 | -1.67192600 |
| H | 2.40032800  | -1.96505000 | -2.03027200 |
| N | 2.53009800  | -2.39663200 | -0.01280200 |
| S | 2.51591600  | -1.13154900 | 2.21715500  |
| N | 0.48662800  | -1.61822000 | 0.35990500  |
| C | -0.63741700 | -3.16246700 | -1.21388100 |
| C | -1.47860800 | -3.12046400 | -2.32508600 |
| C | -0.79827200 | -4.17538500 | -0.26540800 |
| C | -2.47408000 | -4.08117300 | -2.48963100 |
| H | -1.36312700 | -2.32466800 | -3.05663600 |
| C | -1.79564200 | -5.13224000 | -0.42648100 |
| H | -0.15591700 | -4.20033000 | 0.61124900  |
| C | -2.63412200 | -5.08698700 | -1.54014200 |
| H | -3.13103400 | -4.03586400 | -3.35202500 |
| H | -1.92242800 | -5.91042100 | 0.31886800  |
| H | -3.41392500 | -5.83175700 | -1.66324000 |
| H | 1.91952700  | -3.65497200 | -1.59790500 |
| C | -2.75992600 | 0.12033800  | 0.87210400  |
| C | -2.75170100 | 0.93381500  | 1.93916100  |
| C | -0.38489200 | -0.63723500 | 0.94887200  |

---

|    |             |             |             |
|----|-------------|-------------|-------------|
| C  | -1.49763000 | -0.17745700 | 0.15178900  |
| H  | -1.85253500 | 1.41808800  | 2.29216900  |
| H  | -1.67518200 | -0.78326600 | -0.73089200 |
| O  | -0.08982000 | -0.29987100 | 2.09237800  |
| C  | -3.99131800 | -0.53153500 | 0.33666200  |
| C  | -3.96596700 | -1.88778900 | -0.01494100 |
| C  | -5.17763100 | 0.18700200  | 0.14079100  |
| C  | -5.09972500 | -2.51088600 | -0.52896900 |
| H  | -3.05356100 | -2.46400800 | 0.12247100  |
| C  | -6.30740700 | -0.43415500 | -0.38206300 |
| H  | -5.20275700 | 1.24286900  | 0.38823900  |
| C  | -6.27415900 | -1.78674700 | -0.71544500 |
| H  | -5.05749500 | -3.56460000 | -0.78740800 |
| H  | -7.21554300 | 0.14123900  | -0.53333900 |
| H  | -7.15653800 | -2.27039100 | -1.12257900 |
| Cl | -4.12552700 | 1.26993300  | 2.96497000  |
| N  | 1.37777400  | 0.75684500  | -0.79298300 |
| N  | 0.51699400  | 1.83112500  | -0.52650600 |
| C  | -0.75462400 | 1.58163000  | -0.88495900 |
| H  | -0.84235300 | 1.04182800  | -1.82203100 |
| C  | 0.70530000  | 2.57917700  | 0.73048100  |
| H  | 1.77517000  | 2.73554300  | 0.86699500  |
| C  | -0.02546700 | 3.91017400  | 0.64054200  |
| H  | 0.50552500  | 4.55644300  | -0.07117500 |
| C  | -1.44753800 | 3.72909400  | 0.17115000  |
| C  | -2.43460900 | 4.67970300  | 0.43258800  |
| H  | -2.18592500 | 5.54670200  | 1.03866600  |
| C  | -3.72011200 | 4.53142400  | -0.07785300 |
| H  | -4.47737500 | 5.27900500  | 0.13532900  |

---

|   |             |            |             |
|---|-------------|------------|-------------|
| C | -4.03302900 | 3.42435200 | -0.86756900 |
| H | -5.03275500 | 3.30479600 | -1.27300000 |
| C | -3.06198800 | 2.46620600 | -1.12378900 |
| H | -3.30615000 | 1.58165600 | -1.70798000 |
| C | -1.77236600 | 2.60783000 | -0.60494800 |
| C | 2.66320100  | 1.02029300 | -1.03129000 |
| O | 3.48981600  | 0.08458300 | -1.13996600 |
| C | 3.20856300  | 2.42833500 | -1.17650300 |
| C | 2.54431600  | 3.44842200 | -1.86484600 |
| C | 4.47340300  | 2.68358400 | -0.64028000 |
| C | 3.13174800  | 4.70564900 | -1.99566100 |
| H | 1.56904400  | 3.25814600 | -2.30045100 |
| C | 5.05141100  | 3.94421700 | -0.75249500 |
| H | 4.99205200  | 1.87191500 | -0.14005400 |
| C | 4.37982000  | 4.95990900 | -1.43107000 |
| H | 2.61324500  | 5.48823600 | -2.54126700 |
| H | 6.02850700  | 4.13295400 | -0.31829000 |
| H | 4.83042900  | 5.94288300 | -1.52709700 |
| H | 0.33391700  | 1.97042800 | 1.56308300  |
| H | -0.00419000 | 4.41266500 | 1.61216800  |

**M4RR**

|   |             |             |             |
|---|-------------|-------------|-------------|
| C | -7.62494200 | 0.66843400  | -1.09551700 |
| C | -6.36237200 | 1.15417900  | -1.44335800 |
| C | -5.25976300 | 0.69828900  | -0.73967300 |
| C | -5.40587000 | -0.24633700 | 0.29134500  |
| C | -6.66137200 | -0.73044000 | 0.64027700  |
| C | -7.76844500 | -0.25849900 | -0.06446700 |
| C | -3.10630400 | 0.15084900  | 0.39824200  |

---

|   |             |             |             |
|---|-------------|-------------|-------------|
| C | -2.25627100 | -1.01467500 | 2.05328100  |
| C | -3.81274500 | -1.20509000 | 2.10446100  |
| H | -8.49846800 | 1.01949200  | -1.63354400 |
| H | -6.24701700 | 1.88028000  | -2.24111400 |
| H | -6.76776900 | -1.45873000 | 1.43718200  |
| H | -8.75597700 | -0.62401100 | 0.19634800  |
| H | -1.89112700 | -0.66605500 | 3.02408900  |
| H | -4.27163700 | -0.66488400 | 2.94064800  |
| N | -4.18440600 | -0.59069100 | 0.83935800  |
| S | -3.55724300 | 1.15193100  | -0.97938700 |
| N | -2.00341400 | 0.02683300  | 1.03243900  |
| C | -1.54107500 | -2.30682800 | 1.70272000  |
| C | -1.06276200 | -3.13435600 | 2.72106500  |
| C | -1.38435400 | -2.70302000 | 0.37251800  |
| C | -0.43898800 | -4.34316600 | 2.41885600  |
| H | -1.17310000 | -2.82566000 | 3.75794500  |
| C | -0.76793800 | -3.91531600 | 0.07035700  |
| H | -1.71378100 | -2.05323600 | -0.43454800 |
| C | -0.29283400 | -4.73753200 | 1.09043400  |
| H | -0.06506300 | -4.97343400 | 3.21962200  |
| H | -0.65715300 | -4.20967200 | -0.96893900 |
| H | 0.19357400  | -5.67821300 | 0.85211200  |
| H | -4.10220900 | -2.25727800 | 2.14509700  |
| C | 1.63546800  | 2.34667500  | -0.41402500 |
| C | 2.88689000  | 2.02248300  | -0.74971700 |
| C | 0.15792900  | 0.37049000  | -0.93547300 |
| C | 0.72872700  | 1.26889900  | 0.17130200  |
| H | 3.29231200  | 1.03141600  | -0.58359200 |
| H | -0.12201800 | 1.73138700  | 0.67338000  |

---

|    |             |             |             |
|----|-------------|-------------|-------------|
| O  | -0.67292900 | 0.66264800  | -1.76101400 |
| C  | 1.04147700  | 3.70286400  | -0.54151200 |
| C  | 1.70982700  | 4.82481800  | -0.03934100 |
| C  | -0.23104600 | 3.86102900  | -1.10422600 |
| C  | 1.12518200  | 6.08507400  | -0.11657200 |
| H  | 2.68265300  | 4.70229400  | 0.42647900  |
| C  | -0.80812400 | 5.12437400  | -1.18815400 |
| H  | -0.75668400 | 2.98841800  | -1.48359800 |
| C  | -0.13230100 | 6.23895500  | -0.69624500 |
| H  | 1.65079600  | 6.94719200  | 0.28154100  |
| H  | -1.79058100 | 5.23689700  | -1.63567900 |
| H  | -0.58644200 | 7.22275500  | -0.75857400 |
| Cl | 4.03019100  | 3.10206500  | -1.49554800 |
| N  | 0.85865500  | -0.84046900 | -0.88237200 |
| N  | 1.90308900  | -0.78543200 | 0.10092600  |
| C  | 1.36896700  | 0.20697700  | 1.05919900  |
| H  | 0.52151700  | -0.26075800 | 1.59140900  |
| C  | 2.12819000  | -2.03306300 | 0.84387600  |
| H  | 2.30244100  | -2.86050900 | 0.15485500  |
| C  | 3.38309200  | -1.77808000 | 1.67889600  |
| H  | 4.25416200  | -1.81801000 | 1.01328200  |
| C  | 3.37640400  | -0.43427800 | 2.38461200  |
| C  | 4.34103400  | -0.15019900 | 3.35395200  |
| H  | 5.07451600  | -0.91171400 | 3.60763100  |
| C  | 4.37384100  | 1.08468800  | 3.99208700  |
| H  | 5.13103800  | 1.28563900  | 4.74318500  |
| C  | 3.43488600  | 2.06126000  | 3.66460200  |
| H  | 3.45730400  | 3.02872800  | 4.15544200  |
| C  | 2.47019700  | 1.79326000  | 2.69960100  |

---

|   |             |             |             |
|---|-------------|-------------|-------------|
| H | 1.74107000  | 2.55482000  | 2.43206100  |
| C | 2.43839500  | 0.55420800  | 2.05889400  |
| C | 0.84653800  | -1.77206600 | -1.93448700 |
| O | -0.18551400 | -2.00086000 | -2.52856700 |
| C | 2.12764000  | -2.45596200 | -2.28984800 |
| C | 3.36448500  | -1.80640000 | -2.24454900 |
| C | 2.04167600  | -3.76947600 | -2.75675800 |
| C | 4.51099100  | -2.48068500 | -2.65093700 |
| H | 3.42110600  | -0.78045600 | -1.89982900 |
| C | 3.19336300  | -4.44614900 | -3.14258600 |
| H | 1.06792400  | -4.24504600 | -2.81554100 |
| C | 4.42791800  | -3.80222000 | -3.08771100 |
| H | 5.47000600  | -1.97399900 | -2.62750800 |
| H | 3.12801900  | -5.47098300 | -3.49227700 |
| H | 5.32679800  | -4.32845400 | -3.39258300 |
| H | 1.25891200  | -2.28161600 | 1.47005600  |
| H | 3.50392500  | -2.58239700 | 2.41114200  |

**M4RS**

|   |             |             |            |
|---|-------------|-------------|------------|
| C | -6.81116100 | -0.12306100 | 0.46606900 |
| C | -5.76373000 | 0.73527900  | 0.12286500 |
| C | -4.48867400 | 0.44533000  | 0.57993500 |
| C | -4.25625200 | -0.68641000 | 1.38109400 |
| C | -5.29487400 | -1.54615200 | 1.72052700 |
| C | -6.57490600 | -1.25195800 | 1.24952800 |
| C | -2.07149700 | 0.08520300  | 1.08256400 |
| C | -0.72531200 | -1.18965600 | 2.25151200 |
| C | -2.11519300 | -1.88336300 | 2.24947000 |
| H | -7.81389500 | 0.09001500  | 0.11221300 |



---

|   |             |             |             |
|---|-------------|-------------|-------------|
| H | -5.93999800 | 1.60032300  | -0.50839300 |
| H | -5.10487400 | -2.42176300 | 2.33251400  |
| H | -7.39686600 | -1.91377000 | 1.50119100  |
| H | -0.61144400 | -0.68776200 | 3.22385000  |
| H | -2.42746000 | -2.19277300 | 3.24810800  |
| N | -2.92545800 | -0.78634200 | 1.73779200  |
| S | -2.98389600 | 1.29726100  | 0.18734600  |
| N | -0.81671900 | -0.10711700 | 1.23347400  |
| C | 0.48683800  | -2.06635100 | 2.04534700  |
| C | 1.67268900  | -1.72871000 | 2.70458300  |
| C | 0.48944800  | -3.15385600 | 1.17370200  |
| C | 2.83898000  | -2.45809000 | 2.49515200  |
| H | 1.67879900  | -0.87964500 | 3.38515100  |
| C | 1.65333400  | -3.88946500 | 0.96519300  |
| H | -0.40554300 | -3.41986500 | 0.62214900  |
| C | 2.83069600  | -3.54416800 | 1.62259500  |
| H | 3.75448600  | -2.17627800 | 3.00477300  |
| H | 1.63790600  | -4.72848800 | 0.27611100  |
| H | 3.74244400  | -4.10763000 | 1.44989000  |
| H | -2.16862700 | -2.74547300 | 1.57136000  |
| C | 2.01612200  | 2.40181300  | -0.28169500 |
| C | 3.15901500  | 2.88606000  | -0.77163300 |
| C | 0.45755100  | 0.64688500  | -1.21999000 |
| C | 1.71780000  | 0.92868400  | -0.40911000 |
| H | 3.90191100  | 2.27491000  | -1.26883300 |
| H | 1.48500200  | 0.49768500  | 0.57729200  |
| O | -0.46837400 | 1.38555900  | -1.42733000 |
| C | 0.98912100  | 3.20972500  | 0.43090000  |
| C | 0.44066900  | 4.35644300  | -0.15121300 |

---

|    |             |             |             |
|----|-------------|-------------|-------------|
| C  | 0.52401600  | 2.79420300  | 1.68202500  |
| C  | -0.54813800 | 5.07770200  | 0.50897400  |
| H  | 0.77837400  | 4.66723500  | -1.13471500 |
| C  | -0.46243700 | 3.51885600  | 2.34412300  |
| H  | 0.92348000  | 1.89305500  | 2.13723200  |
| C  | -1.00188100 | 4.66143200  | 1.75931600  |
| H  | -0.97224100 | 5.96083700  | 0.04203200  |
| H  | -0.81458000 | 3.18458900  | 3.31490500  |
| H  | -1.77843600 | 5.22067100  | 2.27131500  |
| Cl | 3.66976700  | 4.54433800  | -0.63390300 |
| N  | 0.60462600  | -0.66536300 | -1.73553400 |
| N  | 1.86898300  | -1.19733600 | -1.31500700 |
| C  | 2.70471600  | 0.00181600  | -1.09336100 |
| H  | 2.99706600  | 0.44149700  | -2.06847400 |
| C  | 2.45830500  | -2.12230600 | -2.29495600 |
| H  | 2.13002900  | -1.86022000 | -3.31118100 |
| C  | 4.00184500  | -2.08217500 | -2.22456300 |
| H  | 4.37378200  | -1.40717300 | -3.00546100 |
| C  | 4.53908300  | -1.59031300 | -0.90379900 |
| C  | 5.62966700  | -2.16253100 | -0.25749400 |
| H  | 6.10370000  | -3.04416600 | -0.68071300 |
| C  | 6.11782300  | -1.60237000 | 0.92323100  |
| H  | 6.97399600  | -2.04915300 | 1.41885700  |
| C  | 5.51205200  | -0.47181100 | 1.46365700  |
| H  | 5.89274200  | -0.03665200 | 2.38222800  |
| C  | 4.40211100  | 0.09414700  | 0.83500300  |
| H  | 3.91241000  | 0.96385400  | 1.26551000  |
| C  | 3.92287000  | -0.46298900 | -0.34459300 |
| C  | -0.43678700 | -1.59657000 | -1.85452700 |

---

|   |             |             |             |
|---|-------------|-------------|-------------|
| O | -0.21372100 | -2.78316300 | -1.70559500 |
| C | -1.80210500 | -1.11594600 | -2.21274900 |
| C | -2.03488300 | -0.13936400 | -3.17964300 |
| C | -2.87564300 | -1.77918800 | -1.61071200 |
| C | -3.34241200 | 0.18209100  | -3.53051900 |
| H | -1.19833700 | 0.36476300  | -3.65014100 |
| C | -4.18035500 | -1.43907300 | -1.94541200 |
| H | -2.67254200 | -2.55578800 | -0.87789300 |
| C | -4.41257500 | -0.45669200 | -2.90702500 |
| H | -3.52535400 | 0.93668500  | -4.28837700 |
| H | -5.01406500 | -1.92197700 | -1.44341000 |
| H | -5.43178400 | -0.18909400 | -3.16876900 |
| H | 2.08785600  | -3.12002800 | -2.06306200 |
| H | 4.39946600  | -3.07302700 | -2.45633000 |

**M4SR**

|   |             |             |             |
|---|-------------|-------------|-------------|
| C | -7.41324900 | -1.69171400 | -0.26022400 |
| C | -6.45321300 | -0.74149500 | -0.61446100 |
| C | -5.14670500 | -0.92995700 | -0.19405500 |
| C | -4.79154400 | -2.06249000 | 0.55915600  |
| C | -5.74494100 | -3.00966300 | 0.91391500  |
| C | -7.06049500 | -2.80796900 | 0.49682200  |
| C | -2.74922800 | -0.93093800 | 0.49039500  |
| C | -1.27465400 | -2.05829000 | 1.65922200  |
| C | -2.65992500 | -2.76117600 | 1.86276100  |
| H | -8.44103900 | -1.55523800 | -0.57765500 |
| H | -6.72475600 | 0.13091200  | -1.19935800 |
| H | -5.46449900 | -3.88137200 | 1.49559700  |
| H | -7.81820000 | -3.53615100 | 0.76637900  |

---

|   |             |             |             |
|---|-------------|-------------|-------------|
| H | -0.82853500 | -1.82955500 | 2.63295000  |
| H | -3.08249700 | -2.57274300 | 2.85685400  |
| N | -3.43846500 | -2.07444300 | 0.84470100  |
| S | -3.74825200 | 0.12253600  | -0.50650800 |
| N | -1.55800300 | -0.79668900 | 0.93831900  |
| C | -0.31079000 | -2.94049200 | 0.88283400  |
| C | 0.42581100  | -3.91421400 | 1.56574800  |
| C | -0.17270000 | -2.82956600 | -0.50206400 |
| C | 1.28268200  | -4.76706300 | 0.87647900  |
| H | 0.32862300  | -4.00000600 | 2.64593500  |
| C | 0.69103800  | -3.68056900 | -1.19083700 |
| H | -0.71161200 | -2.05162900 | -1.03725800 |
| C | 1.41670200  | -4.65126900 | -0.50660700 |
| H | 1.85329300  | -5.51455400 | 1.41884100  |
| H | 0.80874500  | -3.56799400 | -2.26477000 |
| H | 2.09572200  | -5.30444200 | -1.04515700 |
| H | -2.61034000 | -3.83698900 | 1.68277000  |
| C | 2.08740500  | -0.55322500 | -1.58199900 |
| C | 1.75345900  | -0.68428600 | -2.86807000 |
| C | -0.09452900 | 0.78810800  | -1.17910500 |
| C | 1.22532600  | 0.24994500  | -0.63028900 |
| H | 0.86410100  | -0.25282700 | -3.30275300 |
| H | 0.93730000  | -0.40426800 | 0.20375400  |
| O | -0.85032000 | 0.26089700  | -1.95958500 |
| C | 3.31116600  | -1.14731000 | -0.97572000 |
| C | 3.22983700  | -1.87686800 | 0.21504000  |
| C | 4.56778400  | -0.92343400 | -1.54803400 |
| C | 4.37905500  | -2.38467900 | 0.81062700  |
| H | 2.26289500  | -2.05881800 | 0.67660600  |

---

|    |             |             |             |
|----|-------------|-------------|-------------|
| C  | 5.71848100  | -1.42233000 | -0.94543400 |
| H  | 4.64030000  | -0.33872300 | -2.46008300 |
| C  | 5.62715800  | -2.15611700 | 0.23476100  |
| H  | 4.29741200  | -2.95540000 | 1.73056600  |
| H  | 6.68735000  | -1.23441700 | -1.39734900 |
| H  | 6.52484000  | -2.54522300 | 0.70490600  |
| Cl | 2.63769300  | -1.66086800 | -4.01155500 |
| N  | -0.25194600 | 2.06694700  | -0.63008400 |
| N  | 0.75800500  | 2.40952700  | 0.29780200  |
| C  | 1.89672000  | 1.53788900  | -0.07156500 |
| H  | 2.42703300  | 2.02353100  | -0.90164800 |
| C  | 0.27875100  | 2.32780800  | 1.70042100  |
| H  | -0.81357400 | 2.32816000  | 1.67321500  |
| C  | 0.79663700  | 1.11773100  | 2.48281800  |
| H  | 0.30819900  | 0.21253100  | 2.10569500  |
| C  | 2.29307100  | 1.04708100  | 2.34390800  |
| C  | 3.14781700  | 0.78263600  | 3.41274600  |
| H  | 2.72576100  | 0.58025700  | 4.39373000  |
| C  | 4.52830300  | 0.78589400  | 3.23127400  |
| H  | 5.18443900  | 0.57085400  | 4.06882600  |
| C  | 5.06574600  | 1.08211600  | 1.98032100  |
| H  | 6.14105000  | 1.09579000  | 1.83539900  |
| C  | 4.21906100  | 1.36149200  | 0.91230400  |
| H  | 4.63207500  | 1.58772800  | -0.06675700 |
| C  | 2.83700000  | 1.32414000  | 1.08417600  |
| C  | -1.23429400 | 2.99629800  | -0.99450000 |
| O  | -2.21341800 | 2.65580500  | -1.62483800 |
| C  | -1.04924600 | 4.42145800  | -0.56176800 |
| C  | 0.18028800  | 5.08677800  | -0.58429900 |

---

|   |             |            |             |
|---|-------------|------------|-------------|
| C | -2.21361700 | 5.12107400 | -0.23572200 |
| C | 0.23724500  | 6.44034500 | -0.27020600 |
| H | 1.08157500  | 4.54665900 | -0.84682400 |
| C | -2.14794600 | 6.46847700 | 0.10300600  |
| H | -3.16304000 | 4.59594100 | -0.25447100 |
| C | -0.92186300 | 7.12878700 | 0.08493700  |
| H | 1.18981200  | 6.95896300 | -0.29980800 |
| H | -3.05236900 | 7.00377600 | 0.37222900  |
| H | -0.86923500 | 8.18191200 | 0.34232100  |
| H | 0.60424400  | 3.24554200 | 2.20116100  |
| H | 0.51331200  | 1.22330300 | 3.53466100  |

**M4SS**

|   |             |             |             |
|---|-------------|-------------|-------------|
| C | -7.30289300 | -1.70572200 | -1.69738500 |
| C | -6.24478200 | -0.88412700 | -2.09139800 |
| C | -5.07349200 | -0.91196500 | -1.35174900 |
| C | -4.95716600 | -1.73798500 | -0.22079000 |
| C | -6.00736000 | -2.56016600 | 0.17109700  |
| C | -7.18015700 | -2.53503300 | -0.58384300 |
| C | -2.82111700 | -0.79566200 | -0.29108400 |
| C | -1.62698600 | -1.61797500 | 1.35860700  |
| C | -2.96828400 | -2.41753000 | 1.31308500  |
| H | -8.22433200 | -1.69866400 | -2.26876900 |
| H | -6.33171600 | -0.24442900 | -2.96331300 |
| H | -5.91151400 | -3.19896200 | 1.04274300  |
| H | -8.00928200 | -3.17161500 | -0.29398300 |
| H | -1.64942200 | -0.94859500 | 2.23145000  |
| H | -3.44495700 | -2.49551000 | 2.29138400  |
| N | -3.72764200 | -1.57920400 | 0.39512700  |

---

|   |             |             |             |
|---|-------------|-------------|-------------|
| S | -3.58107100 | 0.00106100  | -1.66431500 |
| N | -1.61501400 | -0.77878600 | 0.13733100  |
| C | -0.41075800 | -2.50801500 | 1.46974000  |
| C | 0.19657300  | -2.72486500 | 2.70746700  |
| C | 0.09296700  | -3.16109900 | 0.34050000  |
| C | 1.28631300  | -3.58655400 | 2.82121500  |
| H | -0.18319500 | -2.21171500 | 3.58730600  |
| C | 1.18541100  | -4.01748000 | 0.45157200  |
| H | -0.37940800 | -2.99041300 | -0.62416700 |
| C | 1.78444900  | -4.23323400 | 1.69302500  |
| H | 1.75168700  | -3.74221300 | 3.78925000  |
| H | 1.56799100  | -4.52169000 | -0.43100400 |
| H | 2.63792600  | -4.89855500 | 1.77656500  |
| H | -2.83020300 | -3.42112300 | 0.89017200  |
| C | 2.47307100  | 0.26374400  | -1.83042000 |
| C | 2.50931700  | 1.12018600  | -2.85379500 |
| C | 0.02885900  | 0.91237500  | -1.53315500 |
| C | 1.21515600  | 0.12312400  | -0.98540400 |
| H | 1.68124700  | 1.76031500  | -3.13201100 |
| H | 0.91157400  | -0.92914000 | -0.98733700 |
| O | -0.61440500 | 0.66894900  | -2.52504800 |
| C | 3.60649100  | -0.63335600 | -1.47728500 |
| C | 3.41496500  | -2.01658700 | -1.43780600 |
| C | 4.85373000  | -0.10609300 | -1.13147500 |
| C | 4.45245200  | -2.86089200 | -1.05265000 |
| H | 2.44843100  | -2.43476000 | -1.70615000 |
| C | 5.88708300  | -0.94890300 | -0.74006400 |
| H | 4.99487700  | 0.97079800  | -1.13766700 |
| C | 5.68951800  | -2.32832600 | -0.69909200 |

---

|    |             |             |             |
|----|-------------|-------------|-------------|
| H  | 4.29193600  | -3.93452500 | -1.02622500 |
| H  | 6.84566300  | -0.52759200 | -0.45397900 |
| H  | 6.49674700  | -2.98440800 | -0.38926900 |
| Cl | 3.86473500  | 1.30106200  | -3.93125700 |
| N  | -0.20286000 | 1.96397600  | -0.64169800 |
| N  | 0.71449300  | 2.00751300  | 0.43546100  |
| C  | 1.25133300  | 0.63250500  | 0.48592600  |
| H  | 0.49967200  | 0.03435000  | 1.01279000  |
| C  | 1.74744200  | 3.02480900  | 0.16625600  |
| H  | 1.23738000  | 3.98786200  | 0.07333900  |
| C  | 2.72105400  | 3.04339100  | 1.33367700  |
| H  | 2.20042100  | 3.41491600  | 2.22452500  |
| C  | 3.27192300  | 1.66592400  | 1.61641500  |
| C  | 4.48240900  | 1.49677200  | 2.29828500  |
| H  | 5.05214500  | 2.37670100  | 2.58654700  |
| C  | 4.95505700  | 0.22913600  | 2.61213100  |
| H  | 5.89939600  | 0.11756600  | 3.13586000  |
| C  | 4.21182300  | -0.89852400 | 2.25529500  |
| H  | 4.56937300  | -1.89484000 | 2.49671900  |
| C  | 3.01321900  | -0.74151300 | 1.57712300  |
| H  | 2.43196900  | -1.61204100 | 1.28220100  |
| C  | 2.54974200  | 0.53297000  | 1.23817300  |
| C  | -1.37332900 | 2.74087700  | -0.62912100 |
| O  | -1.93575800 | 3.02254400  | -1.66485700 |
| C  | -1.90022000 | 3.16735800  | 0.70240100  |
| C  | -2.57091200 | 4.38885800  | 0.77075100  |
| C  | -1.85110300 | 2.32734700  | 1.81805900  |
| C  | -3.16358000 | 4.78943600  | 1.96370100  |
| H  | -2.62138700 | 5.01111700  | -0.11697700 |



---

|   |             |            |             |
|---|-------------|------------|-------------|
| C | -2.46521800 | 2.72064800 | 3.00138900  |
| H | -1.34724400 | 1.36935700 | 1.73969800  |
| C | -3.11140200 | 3.95454100 | 3.07791100  |
| H | -3.67236000 | 5.74588800 | 2.02258800  |
| H | -2.44020100 | 2.06653400 | 3.86685800  |
| H | -3.58023100 | 4.26270300 | 4.00716700  |
| H | 2.27794100  | 2.82368100 | -0.77439200 |
| H | 3.53457500  | 3.74320500 | 1.12050000  |

**TS4RR**

|   |             |             |             |
|---|-------------|-------------|-------------|
| C | -7.36246800 | 0.95167200  | -0.85130900 |
| C | -6.15313000 | 1.01309500  | -1.54298100 |
| C | -4.97923300 | 0.76121300  | -0.84699500 |
| C | -5.01949100 | 0.44553700  | 0.51822000  |
| C | -6.21982000 | 0.38408500  | 1.21570300  |
| C | -7.39265500 | 0.64425200  | 0.51010500  |
| C | -2.73639100 | 0.39635100  | 0.11119200  |
| C | -1.68075200 | -0.18369700 | 2.01683700  |
| C | -3.18679800 | 0.08235300  | 2.34572400  |
| H | -8.28876000 | 1.14765900  | -1.37970500 |
| H | -6.12891600 | 1.25598000  | -2.60007300 |
| H | -6.23664400 | 0.13883000  | 2.27214300  |
| H | -8.34322700 | 0.60346400  | 1.03075300  |
| H | -1.04841700 | 0.44210400  | 2.65454600  |
| H | -3.33508000 | 1.01369900  | 2.90180000  |
| N | -3.74060700 | 0.21129800  | 1.00312900  |
| S | -3.31731400 | 0.79883300  | -1.47800100 |
| N | -1.54412800 | 0.25372500  | 0.60779000  |
| C | -1.30720300 | -1.64055200 | 2.21308200  |

---

|   |             |             |             |
|---|-------------|-------------|-------------|
| C | -0.70624000 | -2.03972100 | 3.40732800  |
| C | -1.59718600 | -2.59193700 | 1.23401500  |
| C | -0.38840600 | -3.37945100 | 3.62198200  |
| H | -0.47242700 | -1.29743000 | 4.16721300  |
| C | -1.27594500 | -3.92934800 | 1.44796700  |
| H | -2.02831000 | -2.27869300 | 0.28644400  |
| C | -0.67126300 | -4.32603200 | 2.64038200  |
| H | 0.08701600  | -3.68009700 | 4.55012800  |
| H | -1.49022700 | -4.66309900 | 0.67700400  |
| H | -0.41780900 | -5.36883900 | 2.80204200  |
| H | -3.63980900 | -0.74886700 | 2.88878000  |
| C | 1.74112500  | 2.10745100  | -0.49861900 |
| C | 2.76429100  | 1.61211700  | -1.19542300 |
| C | -0.17818200 | 0.43826100  | -0.50835200 |
| C | 0.89749500  | 1.17699400  | 0.35990900  |
| H | 3.04013400  | 0.56495900  | -1.16060000 |
| H | 0.38036400  | 1.78373600  | 1.10695100  |
| O | -0.65635600 | 0.96118300  | -1.52994200 |
| C | 1.36847100  | 3.54622300  | -0.45860000 |
| C | 2.31436900  | 4.51349500  | -0.10288500 |
| C | 0.04610000  | 3.93770000  | -0.69878100 |
| C | 1.94927300  | 5.85295800  | -0.00411000 |
| H | 3.33480100  | 4.20744300  | 0.10915100  |
| C | -0.31265300 | 5.27940000  | -0.60684000 |
| H | -0.67876400 | 3.17628000  | -0.97664000 |
| C | 0.63557100  | 6.23961200  | -0.25962600 |
| H | 2.69107000  | 6.59417900  | 0.27658200  |
| H | -1.33746800 | 5.57605300  | -0.80806300 |
| H | 0.35152000  | 7.28461500  | -0.18522200 |

---

|    |             |             |             |
|----|-------------|-------------|-------------|
| Cl | 3.78012200  | 2.54697000  | -2.25968700 |
| N  | 0.35469900  | -0.95378500 | -0.59325800 |
| N  | 1.66933200  | -1.02926800 | -0.02343700 |
| C  | 1.62113300  | 0.00995500  | 1.02124500  |
| H  | 0.95524900  | -0.34914100 | 1.82627600  |
| C  | 1.97572500  | -2.30255700 | 0.64328800  |
| H  | 1.80519600  | -3.13604900 | -0.03838500 |
| C  | 3.45707200  | -2.23092300 | 1.01022700  |
| H  | 4.04516900  | -2.35811800 | 0.09250000  |
| C  | 3.84840300  | -0.91773000 | 1.65976000  |
| C  | 5.09487600  | -0.78331300 | 2.27687700  |
| H  | 5.76587800  | -1.63847700 | 2.30156900  |
| C  | 5.48299400  | 0.42020300  | 2.85441700  |
| H  | 6.45535400  | 0.50588300  | 3.32894500  |
| C  | 4.62177700  | 1.51598600  | 2.82012900  |
| H  | 4.91967100  | 2.46041600  | 3.26394500  |
| C  | 3.37988800  | 1.39661800  | 2.20664200  |
| H  | 2.70977600  | 2.25237500  | 2.16450600  |
| C  | 2.99019300  | 0.18870800  | 1.62616400  |
| C  | -0.09293100 | -1.78999400 | -1.58190500 |
| O  | -1.28139200 | -1.80403700 | -1.88400600 |
| C  | 0.87388500  | -2.70234800 | -2.27666500 |
| C  | 2.14970500  | -2.27923100 | -2.65862400 |
| C  | 0.42888100  | -3.97814300 | -2.62566700 |
| C  | 2.97831500  | -3.13912200 | -3.37254800 |
| H  | 2.48005600  | -1.27938000 | -2.40003300 |
| C  | 1.26672900  | -4.84270500 | -3.32278800 |
| H  | -0.57679700 | -4.27548300 | -2.34592200 |
| C  | 2.54250600  | -4.42332000 | -3.69572100 |

---

|   |            |             |             |
|---|------------|-------------|-------------|
| H | 3.96377200 | -2.80564700 | -3.68102200 |
| H | 0.92355300 | -5.83878800 | -3.58279000 |
| H | 3.19473900 | -5.09428000 | -4.24582400 |
| H | 1.33900600 | -2.44576300 | 1.53034900  |
| H | 3.71399000 | -3.06499800 | 1.67083700  |

**TS4RS**

|   |             |             |             |
|---|-------------|-------------|-------------|
| C | -6.89485800 | -1.84913400 | -0.87186300 |
| C | -5.75387500 | -1.67010400 | -1.65452700 |
| C | -4.57353700 | -1.29563100 | -1.02928400 |
| C | -4.53959000 | -1.09520500 | 0.35881600  |
| C | -5.67180700 | -1.27165900 | 1.14551700  |
| C | -6.85135900 | -1.65300500 | 0.50922800  |
| C | -2.33080800 | -0.64941100 | -0.20752500 |
| C | -1.21094600 | -0.07962600 | 1.65283800  |
| C | -2.66040100 | -0.50076600 | 2.06986200  |
| H | -7.82410100 | -2.14590800 | -1.34539400 |
| H | -5.78608400 | -1.82485000 | -2.72784000 |
| H | -5.63044300 | -1.11658000 | 2.21836700  |
| H | -7.74880800 | -1.79947800 | 1.10063700  |
| H | -1.09617900 | 0.99849600  | 1.81674400  |
| H | -3.17109600 | 0.28827200  | 2.62703000  |
| N | -3.27598000 | -0.70715500 | 0.76714200  |
| S | -2.99072700 | -1.00263600 | -1.78356000 |
| N | -1.14321900 | -0.34090000 | 0.19865400  |
| C | -0.13397900 | -0.81772300 | 2.40974700  |
| C | 0.54534300  | -0.18540800 | 3.45000700  |
| C | 0.18416600  | -2.13701400 | 2.07435000  |
| C | 1.54598600  | -0.86070100 | 4.14779600  |

---

|    |             |             |             |
|----|-------------|-------------|-------------|
| H  | 0.30404800  | 0.84572800  | 3.69868700  |
| C  | 1.18010300  | -2.81129700 | 2.77369300  |
| H  | -0.32673600 | -2.61266500 | 1.23916300  |
| C  | 1.86639800  | -2.17245600 | 3.80738500  |
| H  | 2.07835500  | -0.35965700 | 4.94986200  |
| H  | 1.43697200  | -3.83013200 | 2.49939900  |
| H  | 2.65085500  | -2.69663600 | 4.34372400  |
| H  | -2.66802800 | -1.43035300 | 2.64888600  |
| C  | 0.04837900  | 2.57095500  | -0.93121700 |
| C  | 0.19113800  | 3.12706300  | -2.13084200 |
| C  | 0.10541200  | 0.07279900  | -1.11877200 |
| C  | 0.80498600  | 1.33392400  | -0.53161400 |
| H  | 0.89656500  | 2.78501400  | -2.87777000 |
| H  | 0.82104100  | 1.27110300  | 0.56284100  |
| O  | -0.54472400 | 0.10745400  | -2.16673100 |
| C  | -1.00798800 | 2.96139100  | 0.04260800  |
| C  | -0.67766900 | 3.56178400  | 1.25991700  |
| C  | -2.32950000 | 2.57722300  | -0.20227200 |
| C  | -1.66099400 | 3.77478200  | 2.22480200  |
| H  | 0.35342400  | 3.84845300  | 1.45176300  |
| C  | -3.30799600 | 2.77482600  | 0.76890400  |
| H  | -2.56540200 | 2.08858900  | -1.14468500 |
| C  | -2.97402500 | 3.37253900  | 1.98458200  |
| H  | -1.40013800 | 4.24733600  | 3.16648500  |
| H  | -4.32880800 | 2.45594400  | 0.57871300  |
| H  | -3.73628700 | 3.52729600  | 2.74160300  |
| Cl | -0.74199300 | 4.49573800  | -2.66658800 |
| N  | 1.15114800  | -0.94764100 | -0.94920000 |
| N  | 2.43473600  | -0.37899900 | -0.72854300 |

---

|   |             |             |             |
|---|-------------|-------------|-------------|
| C | 2.24615700  | 1.06254000  | -1.01880700 |
| H | 2.27710900  | 1.16929200  | -2.11148800 |
| C | 2.91406400  | -0.63843100 | 0.63882500  |
| H | 2.90919100  | -1.72078000 | 0.78394200  |
| C | 4.32118400  | -0.08458900 | 0.74092600  |
| H | 4.96881100  | -0.62461600 | 0.03875900  |
| C | 4.32287200  | 1.38870900  | 0.42146100  |
| C | 5.30685800  | 2.22982300  | 0.94802300  |
| H | 6.06834400  | 1.80233900  | 1.59542400  |
| C | 5.32072300  | 3.58857000  | 0.66150800  |
| H | 6.09181000  | 4.22691300  | 1.08075900  |
| C | 4.33743400  | 4.12403500  | -0.16825000 |
| H | 4.33747800  | 5.18259300  | -0.40685500 |
| C | 3.35485700  | 3.29716500  | -0.69849700 |
| H | 2.59868900  | 3.71950000  | -1.35104300 |
| C | 3.32971800  | 1.92809000  | -0.40658900 |
| C | 0.94833900  | -2.27296700 | -1.19586700 |
| O | -0.18557500 | -2.73371500 | -1.27949900 |
| C | 2.14096700  | -3.18721600 | -1.27137300 |
| C | 3.32575900  | -2.87003900 | -1.94181200 |
| C | 1.98904900  | -4.45025200 | -0.69376600 |
| C | 4.34959700  | -3.80976400 | -2.01803300 |
| H | 3.44165000  | -1.89242600 | -2.39360700 |
| C | 3.02362900  | -5.37832300 | -0.75118800 |
| H | 1.04776800  | -4.69161900 | -0.20953000 |
| C | 4.20602200  | -5.05825900 | -1.41492800 |
| H | 5.26302900  | -3.56599400 | -2.55091200 |
| H | 2.90370300  | -6.35283200 | -0.28889400 |
| H | 5.01219300  | -5.78304800 | -1.46964000 |

---

|              |             |             |             |
|--------------|-------------|-------------|-------------|
| H            | 2.26761000  | -0.19229500 | 1.40708100  |
| H            | 4.71571700  | -0.25284700 | 1.74759300  |
| <b>TS4SR</b> |             |             |             |
| C            | 7.06097500  | -2.39008600 | 0.51387800  |
| C            | 6.05834900  | -1.90239200 | 1.35270200  |
| C            | 4.83731900  | -1.55641300 | 0.79341100  |
| C            | 4.62274800  | -1.69645400 | -0.58624900 |
| C            | 5.61807300  | -2.17820500 | -1.42820700 |
| C            | 6.84164200  | -2.52294900 | -0.85766600 |
| C            | 2.57473400  | -0.84242200 | 0.09850100  |
| C            | 1.21117600  | -0.70700300 | -1.67702300 |
| C            | 2.64180300  | -1.10173700 | -2.18936600 |
| H            | 8.02071000  | -2.66649600 | 0.93607500  |
| H            | 6.22975900  | -1.79315900 | 2.41840300  |
| H            | 5.44126000  | -2.28078100 | -2.49344700 |
| H            | 7.63416300  | -2.90044800 | -1.49467800 |
| H            | 0.88472900  | 0.22371600  | -2.15741300 |
| H            | 3.12157000  | -0.29872200 | -2.75651200 |
| N            | 3.33709800  | -1.30856400 | -0.92471400 |
| S            | 3.41327400  | -0.89271900 | 1.62667700  |
| N            | 1.38412100  | -0.46852100 | -0.23394700 |
| C            | 0.18948100  | -1.79921600 | -1.94196000 |
| C            | -0.57953500 | -1.77444000 | -3.10788900 |
| C            | 0.04492400  | -2.86515600 | -1.05033900 |
| C            | -1.47955700 | -2.80384800 | -3.38130000 |
| H            | -0.47333700 | -0.94671200 | -3.80574100 |
| C            | -0.85596200 | -3.89067500 | -1.32180400 |
| H            | 0.62116000  | -2.87768400 | -0.12994700 |

---

|    |             |             |             |
|----|-------------|-------------|-------------|
| C  | -1.61810800 | -3.86386900 | -2.48840500 |
| H  | -2.07529100 | -2.77307900 | -4.28797900 |
| H  | -0.97105500 | -4.70464100 | -0.61338000 |
| H  | -2.32649400 | -4.65980300 | -2.69376500 |
| H  | 2.62265200  | -2.01478800 | -2.78798300 |
| C  | -1.59743100 | -1.13441500 | 1.39671200  |
| C  | -0.84592000 | -1.82354400 | 2.26115100  |
| C  | 0.40122000  | 0.51988900  | 1.01747200  |
| C  | -1.03604300 | 0.07308000  | 0.67715300  |
| H  | 0.14035200  | -1.50657100 | 2.56513100  |
| H  | -1.05319800 | -0.17364900 | -0.38940100 |
| O  | 0.97813300  | 0.32283800  | 2.09339200  |
| C  | -2.96605600 | -1.56750500 | 0.99416000  |
| C  | -3.30708500 | -1.69778800 | -0.35571300 |
| C  | -3.94145800 | -1.82413900 | 1.96336000  |
| C  | -4.58994200 | -2.08763900 | -0.72616900 |
| H  | -2.56570500 | -1.50446300 | -1.12727100 |
| C  | -5.22563900 | -2.20958600 | 1.59327100  |
| H  | -3.69061900 | -1.70458500 | 3.01297400  |
| C  | -5.55358300 | -2.34470800 | 0.24636400  |
| H  | -4.83455300 | -2.18697900 | -1.77952600 |
| H  | -5.97245300 | -2.39798800 | 2.35819100  |
| H  | -6.55591900 | -2.64348000 | -0.04414000 |
| Cl | -1.32003000 | -3.35170100 | 2.96632500  |
| N  | 0.44784100  | 1.86528500  | 0.42618800  |
| N  | -0.84172000 | 2.39407900  | 0.17421500  |
| C  | -1.77629600 | 1.43351300  | 0.81191200  |
| H  | -1.84045100 | 1.68466300  | 1.87845500  |
| C  | -1.06834600 | 2.71315900  | -1.25276400 |



---

|   |             |            |             |
|---|-------------|------------|-------------|
| H | -0.08800700 | 2.77080100 | -1.73242400 |
| C | -1.99722300 | 1.75107300 | -1.99720000 |
| H | -1.50841200 | 0.78023900 | -2.15798200 |
| C | -3.26279800 | 1.58651900 | -1.20052000 |
| C | -4.52740200 | 1.57854600 | -1.78591000 |
| H | -4.61482300 | 1.67367400 | -2.86518700 |
| C | -5.66862300 | 1.45070500 | -0.99978200 |
| H | -6.64910600 | 1.43699900 | -1.46542000 |
| C | -5.55082000 | 1.35110700 | 0.38489400  |
| H | -6.43729000 | 1.25467700 | 1.00341500  |
| C | -4.29226600 | 1.37964200 | 0.97643900  |
| H | -4.19394900 | 1.29952100 | 2.05594700  |
| C | -3.14644200 | 1.48479400 | 0.19055700  |
| C | 1.57610600  | 2.64315800 | 0.44503700  |
| O | 2.68616300  | 2.13337000 | 0.53652200  |
| C | 1.44921600  | 4.13414800 | 0.26847800  |
| C | 0.42435100  | 4.90975900 | 0.81960000  |
| C | 2.49919600  | 4.76042600 | -0.40857900 |
| C | 0.45161100  | 6.29429900 | 0.67862800  |
| H | -0.38743300 | 4.42658600 | 1.34935100  |
| C | 2.51161100  | 6.14179600 | -0.56705800 |
| H | 3.30510100  | 4.14644700 | -0.79678600 |
| C | 1.48589700  | 6.91129500 | -0.02260300 |
| H | -0.33941800 | 6.89339300 | 1.11820100  |
| H | 3.32442300  | 6.61873100 | -1.10513600 |
| H | 1.49513900  | 7.99050500 | -0.13860700 |
| H | -1.50735100 | 3.71648500 | -1.29328600 |
| H | -2.21716900 | 2.15808100 | -2.98902400 |

---

**TS4SS**

|   |             |             |             |
|---|-------------|-------------|-------------|
| C | 7.22483800  | -2.30805800 | 1.01576500  |
| C | 6.08362000  | -2.07723700 | 1.78263000  |
| C | 4.91844400  | -1.69124800 | 1.13446100  |
| C | 4.90509400  | -1.53028200 | -0.25764700 |
| C | 6.03777800  | -1.75645200 | -1.03015800 |
| C | 7.20013500  | -2.14957900 | -0.37152000 |
| C | 2.71132600  | -1.01298300 | 0.27116400  |
| C | 1.60918400  | -0.47511300 | -1.62356900 |
| C | 3.06934100  | -0.89485000 | -2.00311100 |
| H | 8.14192100  | -2.61537800 | 1.50600900  |
| H | 6.10328500  | -2.19962400 | 2.86034100  |
| H | 6.01060500  | -1.62837300 | -2.10689700 |
| H | 8.09947800  | -2.33510300 | -0.94858000 |
| H | 1.47613500  | 0.60174800  | -1.79539600 |
| H | 3.60899900  | -0.10797300 | -2.53342000 |
| N | 3.64908900  | -1.13145500 | -0.68884900 |
| S | 3.33802600  | -1.32562100 | 1.86013400  |
| N | 1.51534000  | -0.72274900 | -0.16671000 |
| C | 0.57424200  | -1.24114000 | -2.42199300 |
| C | -0.01606600 | -0.65807100 | -3.54396700 |
| C | 0.21698200  | -2.54216100 | -2.05914500 |
| C | -0.96257600 | -1.35932200 | -4.28820100 |
| H | 0.25349900  | 0.35722900  | -3.82561100 |
| C | -0.73645700 | -3.23992300 | -2.79567800 |
| H | 0.67301700  | -2.99500500 | -1.18176600 |
| C | -1.32899200 | -2.64917000 | -3.91124900 |
| H | -1.42205200 | -0.89244300 | -5.15315800 |
| H | -1.01854400 | -4.24490200 | -2.49740900 |

---

|    |             |             |             |
|----|-------------|-------------|-------------|
| H  | -2.07560100 | -3.19181700 | -4.48172200 |
| H  | 3.08274000  | -1.81375400 | -2.59677000 |
| C  | -1.96333100 | -0.88720600 | 1.62210800  |
| C  | -1.75932600 | -0.61428700 | 2.91309300  |
| C  | 0.43633100  | 0.00083300  | 1.00856800  |
| C  | -0.97678300 | -0.48493700 | 0.53297000  |
| H  | -0.88827300 | -0.08960100 | 3.27599200  |
| H  | -0.82723500 | -1.38001900 | -0.07435300 |
| O  | 0.90655400  | -0.28446500 | 2.12825000  |
| C  | -3.14860000 | -1.65684700 | 1.14419900  |
| C  | -2.98187300 | -2.80166700 | 0.35880000  |
| C  | -4.44537400 | -1.21873400 | 1.43072200  |
| C  | -4.08693300 | -3.49052700 | -0.13334700 |
| H  | -1.98213200 | -3.16058800 | 0.12824700  |
| C  | -5.54891800 | -1.90448300 | 0.93755600  |
| H  | -4.58052800 | -0.30970900 | 2.00932200  |
| C  | -5.37378900 | -3.04209900 | 0.15192900  |
| H  | -3.94003800 | -4.37859900 | -0.74071600 |
| H  | -6.54828400 | -1.53916600 | 1.15276200  |
| H  | -6.23593200 | -3.57374800 | -0.23848500 |
| Cl | -2.80972700 | -1.14808100 | 4.20470600  |
| N  | 0.45841500  | 1.43404200  | 0.54245500  |
| N  | -0.80047000 | 1.89136000  | 0.10622000  |
| C  | -1.41717700 | 0.66807400  | -0.42187200 |
| H  | -0.92155100 | 0.47578700  | -1.37961800 |
| C  | -1.57068700 | 2.49922000  | 1.20582400  |
| H  | -0.98863600 | 3.34995100  | 1.57110400  |
| C  | -2.90744500 | 2.96805800  | 0.64740100  |
| H  | -2.73051800 | 3.83041100  | -0.00778400 |

---

|            |             |             |             |
|------------|-------------|-------------|-------------|
| C          | -3.60990600 | 1.89224100  | -0.15089300 |
| C          | -4.98208700 | 1.97461200  | -0.41441300 |
| H          | -5.55373800 | 2.79150600  | 0.01957200  |
| C          | -5.61235300 | 1.03937300  | -1.22515200 |
| H          | -6.67851400 | 1.11748500  | -1.41417500 |
| C          | -4.87127300 | 0.00664400  | -1.80354700 |
| H          | -5.35494300 | -0.72350000 | -2.44453800 |
| C          | -3.51246200 | -0.08846600 | -1.54396100 |
| H          | -2.92319400 | -0.89663000 | -1.97562100 |
| C          | -2.88448600 | 0.83404900  | -0.70130700 |
| C          | 1.58730200  | 2.18930800  | 0.44635700  |
| O          | 2.68493600  | 1.73689400  | 0.76029600  |
| C          | 1.48488300  | 3.61897800  | -0.02573500 |
| C          | 2.33533300  | 4.52790800  | 0.61020900  |
| C          | 0.69555300  | 4.05079200  | -1.09662600 |
| C          | 2.37074500  | 5.85965800  | 0.21137600  |
| H          | 2.96895500  | 4.17231700  | 1.41589000  |
| C          | 0.75270100  | 5.37937700  | -1.50968100 |
| H          | 0.03809400  | 3.35136800  | -1.59720800 |
| C          | 1.57837500  | 6.28780600  | -0.85161400 |
| H          | 3.02201800  | 6.56030800  | 0.72386200  |
| H          | 0.14620100  | 5.70505700  | -2.34878200 |
| H          | 1.60873500  | 7.32503900  | -1.17022700 |
| H          | -1.71994700 | 1.80084100  | 2.03742500  |
| H          | -3.54751000 | 3.31383800  | 1.46490100  |
| <b>PRR</b> |             |             |             |
| N          | 1.28835900  | -0.94303700 | 1.22313500  |
| N          | 1.19406000  | 0.42651500  | 0.80110000  |

---

|   |             |             |             |
|---|-------------|-------------|-------------|
| C | -0.09176800 | 0.84618100  | 1.39373500  |
| H | 0.04642800  | 0.91698300  | 2.48871800  |
| C | 2.23662700  | 1.30910900  | 1.33534100  |
| H | 3.22449500  | 0.91647800  | 1.09284700  |
| C | 2.03333500  | 2.65617400  | 0.63777400  |
| H | 2.42785100  | 2.57476300  | -0.38226700 |
| C | 0.58100100  | 3.09119200  | 0.55915900  |
| C | 0.25912500  | 4.37981600  | 0.12742000  |
| H | 1.06144800  | 5.06914900  | -0.12343800 |
| C | -1.06578000 | 4.78674300  | 0.01562400  |
| H | -1.29630100 | 5.79240100  | -0.32080600 |
| C | -2.09525900 | 3.90271100  | 0.33495900  |
| H | -3.13098400 | 4.21318700  | 0.24609900  |
| C | -1.78973600 | 2.61625300  | 0.76355900  |
| H | -2.58893300 | 1.91828300  | 1.00278200  |
| C | -0.46011400 | 2.20901800  | 0.87434300  |
| C | 2.42216500  | -1.74953600 | 0.97299300  |
| O | 2.56851000  | -2.77940700 | 1.59003000  |
| C | 3.40329700  | -1.29703900 | -0.05948600 |
| C | 3.01581500  | -0.67309500 | -1.24867000 |
| C | 4.74689000  | -1.60535300 | 0.16656000  |
| C | 3.97778900  | -0.34735400 | -2.19874400 |
| H | 1.96922300  | -0.45846200 | -1.42958600 |
| C | 5.70676800  | -1.25930200 | -0.77734700 |
| H | 5.02188200  | -2.11419100 | 1.08468700  |
| C | 5.32203700  | -0.62918200 | -1.95946800 |
| H | 3.67738700  | 0.12458800  | -3.12825400 |
| H | 6.75176900  | -1.48610900 | -0.59497200 |
| H | 6.06996000  | -0.36381700 | -2.69981700 |

---

|    |             |             |             |
|----|-------------|-------------|-------------|
| H  | 2.15299900  | 1.39372400  | 2.43011200  |
| H  | 2.62538400  | 3.42226200  | 1.14737400  |
| C  | -1.68833700 | -0.49770100 | -0.17702200 |
| C  | -1.03978900 | -0.08695700 | -1.27011600 |
| C  | 0.01183400  | -1.49562400 | 1.39640900  |
| C  | -1.00225000 | -0.35970900 | 1.17971300  |
| H  | -0.06290500 | 0.37917400  | -1.22320000 |
| H  | -1.75883900 | -0.42931000 | 1.96368400  |
| O  | -0.23024100 | -2.65555400 | 1.61593400  |
| C  | -3.06165700 | -1.06487700 | -0.16570300 |
| C  | -4.11114600 | -0.39376400 | -0.80337000 |
| C  | -3.33104900 | -2.24393300 | 0.53902600  |
| C  | -5.40395600 | -0.90573000 | -0.75645400 |
| H  | -3.91151000 | 0.53829400  | -1.32308800 |
| C  | -4.62381500 | -2.75790900 | 0.57462000  |
| H  | -2.52018200 | -2.75748200 | 1.04884000  |
| C  | -5.66210700 | -2.09215000 | -0.07349400 |
| H  | -6.21105800 | -0.37466200 | -1.25070100 |
| H  | -4.82090900 | -3.67941600 | 1.11287600  |
| H  | -6.67036600 | -2.49219600 | -0.03942000 |
| Cl | -1.63996700 | -0.23742200 | -2.89458800 |

**PRS**

|   |             |             |             |
|---|-------------|-------------|-------------|
| C | -1.39174400 | -1.18078700 | 0.51441600  |
| C | -1.30901300 | -1.30286400 | 1.84105900  |
| C | 0.95285000  | -0.48441100 | -0.18482500 |
| C | -0.53642400 | -0.13623900 | -0.18190400 |
| H | -0.67032800 | -0.68113800 | 2.45673000  |
| H | -0.83167800 | -0.07022300 | -1.23751400 |

---

|    |             |             |             |
|----|-------------|-------------|-------------|
| O  | 1.43537800  | -1.58105000 | -0.31831800 |
| C  | -2.23444400 | -2.03732400 | -0.35815900 |
| C  | -3.60206400 | -2.20259300 | -0.11825900 |
| C  | -1.65244400 | -2.66179700 | -1.46717000 |
| C  | -4.37356800 | -2.98550900 | -0.97200200 |
| H  | -4.06087300 | -1.70810700 | 0.73261700  |
| C  | -2.42410800 | -3.45293200 | -2.31199100 |
| H  | -0.58688200 | -2.54087400 | -1.64651200 |
| C  | -3.78642700 | -3.61455400 | -2.06729000 |
| H  | -5.43556700 | -3.10195900 | -0.78186100 |
| H  | -1.96060800 | -3.94292600 | -3.16197100 |
| H  | -4.38958000 | -4.22709900 | -2.72949700 |
| Cl | -2.14871300 | -2.49951800 | 2.77799100  |
| N  | 1.65836600  | 0.72730500  | -0.03566600 |
| N  | 0.73034500  | 1.81587900  | -0.18594100 |
| C  | -0.50335700 | 1.27128700  | 0.39766300  |
| H  | -0.37110800 | 1.18680900  | 1.49286800  |
| C  | 1.09968800  | 3.02003500  | 0.56199600  |
| H  | 2.10060100  | 3.33590900  | 0.27227700  |
| C  | 0.08287800  | 4.09488100  | 0.17032000  |
| H  | 0.36815400  | 4.49856800  | -0.80745800 |
| C  | -1.34389000 | 3.58917900  | 0.07007600  |
| C  | -2.38793100 | 4.49198000  | -0.13633400 |
| H  | -2.16521800 | 5.55512300  | -0.18175100 |
| C  | -3.69805400 | 4.05056700  | -0.29061300 |
| H  | -4.49578500 | 4.76912800  | -0.44851000 |
| C  | -3.98090300 | 2.68728800  | -0.24887800 |
| H  | -4.99834800 | 2.33366600  | -0.37847700 |
| C  | -2.95041700 | 1.77524100  | -0.04304900 |

---

|   |             |             |             |
|---|-------------|-------------|-------------|
| H | -3.16738100 | 0.71043600  | -0.01608900 |
| C | -1.63871500 | 2.21974400  | 0.11855200  |
| C | 2.95420700  | 0.93252300  | -0.57119400 |
| O | 3.19707000  | 1.93620000  | -1.20695500 |
| C | 3.99341700  | -0.08101200 | -0.24810100 |
| C | 3.95439100  | -0.85723100 | 0.91232000  |
| C | 5.08600100  | -0.16629100 | -1.11433400 |
| C | 5.00354200  | -1.72363900 | 1.19623300  |
| H | 3.11263700  | -0.77402000 | 1.59139800  |
| C | 6.12440700  | -1.04639400 | -0.83606100 |
| H | 5.10421600  | 0.46060200  | -1.99951300 |
| C | 6.08322700  | -1.82404500 | 0.32001900  |
| H | 4.97966800  | -2.32188400 | 2.10066900  |
| H | 6.96633700  | -1.12311200 | -1.51569600 |
| H | 6.89682700  | -2.50731800 | 0.54168800  |
| H | 1.08814800  | 2.82269400  | 1.64611600  |
| H | 0.13769500  | 4.92342200  | 0.88313500  |

**PSR**

|   |             |             |             |
|---|-------------|-------------|-------------|
| C | -1.39174400 | -1.18078700 | 0.51441600  |
| C | -1.30901300 | -1.30286400 | 1.84105900  |
| C | 0.95285000  | -0.48441100 | -0.18482500 |
| C | -0.53642400 | -0.13623900 | -0.18190400 |
| H | -0.67032800 | -0.68113800 | 2.45673000  |
| H | -0.83167800 | -0.07022300 | -1.23751400 |
| O | 1.43537800  | -1.58105000 | -0.31831800 |
| C | -2.23444400 | -2.03732400 | -0.35815900 |
| C | -3.60206400 | -2.20259300 | -0.11825900 |
| C | -1.65244400 | -2.66179700 | -1.46717000 |



---

|    |             |             |             |
|----|-------------|-------------|-------------|
| C  | -4.37356800 | -2.98550900 | -0.97200200 |
| H  | -4.06087300 | -1.70810700 | 0.73261700  |
| C  | -2.42410800 | -3.45293200 | -2.31199100 |
| H  | -0.58688200 | -2.54087400 | -1.64651200 |
| C  | -3.78642700 | -3.61455400 | -2.06729000 |
| H  | -5.43556700 | -3.10195900 | -0.78186100 |
| H  | -1.96060800 | -3.94292600 | -3.16197100 |
| H  | -4.38958000 | -4.22709900 | -2.72949700 |
| Cl | -2.14871300 | -2.49951800 | 2.77799100  |
| N  | 1.65836600  | 0.72730500  | -0.03566600 |
| N  | 0.73034500  | 1.81587900  | -0.18594100 |
| C  | -0.50335700 | 1.27128700  | 0.39766300  |
| H  | -0.37110800 | 1.18680900  | 1.49286800  |
| C  | 1.09968800  | 3.02003500  | 0.56199600  |
| H  | 2.10060100  | 3.33590900  | 0.27227700  |
| C  | 0.08287800  | 4.09488100  | 0.17032000  |
| H  | 0.36815400  | 4.49856800  | -0.80745800 |
| C  | -1.34389000 | 3.58917900  | 0.07007600  |
| C  | -2.38793100 | 4.49198000  | -0.13633400 |
| H  | -2.16521800 | 5.55512300  | -0.18175100 |
| C  | -3.69805400 | 4.05056700  | -0.29061300 |
| H  | -4.49578500 | 4.76912800  | -0.44851000 |
| C  | -3.98090300 | 2.68728800  | -0.24887800 |
| H  | -4.99834800 | 2.33366600  | -0.37847700 |
| C  | -2.95041700 | 1.77524100  | -0.04304900 |
| H  | -3.16738100 | 0.71043600  | -0.01608900 |
| C  | -1.63871500 | 2.21974400  | 0.11855200  |
| C  | 2.95420700  | 0.93252300  | -0.57119400 |
| O  | 3.19707000  | 1.93620000  | -1.20695500 |

---

|   |            |             |             |
|---|------------|-------------|-------------|
| C | 3.99341700 | -0.08101200 | -0.24810100 |
| C | 3.95439100 | -0.85723100 | 0.91232000  |
| C | 5.08600100 | -0.16629100 | -1.11433400 |
| C | 5.00354200 | -1.72363900 | 1.19623300  |
| H | 3.11263700 | -0.77402000 | 1.59139800  |
| C | 6.12440700 | -1.04639400 | -0.83606100 |
| H | 5.10421600 | 0.46060200  | -1.99951300 |
| C | 6.08322700 | -1.82404500 | 0.32001900  |
| H | 4.97966800 | -2.32188400 | 2.10066900  |
| H | 6.96633700 | -1.12311200 | -1.51569600 |
| H | 6.89682700 | -2.50731800 | 0.54168800  |
| H | 1.08814800 | 2.82269400  | 1.64611600  |
| H | 0.13769500 | 4.92342200  | 0.88313500  |

**PSS**

|   |             |            |             |
|---|-------------|------------|-------------|
| N | 1.89368800  | 0.76419000 | -0.08813200 |
| N | 0.89846700  | 1.73361800 | -0.37670600 |
| C | -0.21713700 | 0.94574500 | -0.97283200 |
| H | -0.06080900 | 0.94743800 | -2.05591200 |
| C | 0.55629300  | 2.54759700 | 0.81448800  |
| H | 0.36427700  | 3.56230800 | 0.45357900  |
| C | -0.67030900 | 2.05362600 | 1.58093100  |
| H | -0.88322900 | 2.73057100 | 2.41348700  |
| C | -1.82910600 | 2.00704900 | 0.62085000  |
| C | -3.10271500 | 2.48365100 | 0.92763700  |
| H | -3.30193300 | 2.86535500 | 1.92561500  |
| C | -4.10909800 | 2.47799300 | -0.03478900 |
| H | -5.09968200 | 2.84369900 | 0.21677300  |
| C | -3.84142700 | 2.01751500 | -1.32252800 |

---

|   |             |             |             |
|---|-------------|-------------|-------------|
| H | -4.62238000 | 2.01694200  | -2.07601600 |
| C | -2.56861000 | 1.55570700  | -1.64084800 |
| H | -2.35453900 | 1.18538100  | -2.64007500 |
| C | -1.56867600 | 1.53638300  | -0.67083800 |
| C | 3.22810200  | 1.19955900  | -0.00534400 |
| O | 3.46828600  | 2.37283100  | 0.18832900  |
| C | 4.31281900  | 0.19846300  | -0.22286400 |
| C | 4.21882300  | -0.79035100 | -1.20446100 |
| C | 5.49904500  | 0.36438900  | 0.49300700  |
| C | 5.30435200  | -1.62049300 | -1.45486000 |
| H | 3.30614300  | -0.89995100 | -1.78210000 |
| C | 6.57653900  | -0.48217900 | 0.25521500  |
| H | 5.56431700  | 1.15776700  | 1.23045700  |
| C | 6.47933600  | -1.47323000 | -0.71919400 |
| H | 5.23439600  | -2.38194000 | -2.22426800 |
| H | 7.49372500  | -0.36377500 | 0.82233800  |
| H | 7.32273700  | -2.12855000 | -0.91161300 |
| H | 1.44449500  | 2.58713800  | 1.44319100  |
| H | -0.47554800 | 1.06435800  | 2.01274400  |
| C | -1.08616200 | -1.16937200 | 0.39980600  |
| C | -0.79505600 | -1.53786100 | 1.64994800  |
| C | 1.39352300  | -0.52411100 | 0.09003300  |
| C | -0.01964400 | -0.53349200 | -0.47795300 |
| H | 0.17867900  | -1.39882500 | 2.09975000  |
| H | 0.05743600  | -1.16747200 | -1.36957700 |
| O | 1.99877600  | -1.45941200 | 0.55815600  |
| C | -2.40904500 | -1.39643500 | -0.24558800 |
| C | -3.58666200 | -0.97132500 | 0.37741500  |
| C | -2.48961400 | -1.99631600 | -1.50649300 |

---

|    |             |             |             |
|----|-------------|-------------|-------------|
| C  | -4.81625200 | -1.13837900 | -0.24864600 |
| H  | -3.52686300 | -0.47360300 | 1.33985000  |
| C  | -3.72228300 | -2.17086300 | -2.12918500 |
| H  | -1.59004200 | -2.34553900 | -2.00524800 |
| C  | -4.88859700 | -1.73849200 | -1.50382700 |
| H  | -5.71896600 | -0.78576900 | 0.24030200  |
| H  | -3.76997700 | -2.64556400 | -3.10401700 |
| H  | -5.84899700 | -1.86661700 | -1.99274900 |
| Cl | -1.88737900 | -2.37435300 | 2.71476400  |

**TS3SR<sup>D</sup>**

|   |             |             |             |
|---|-------------|-------------|-------------|
| C | -0.48214900 | 1.85973500  | 0.58660800  |
| C | 0.15293400  | 2.32521400  | -0.50344000 |
| C | 1.44835600  | 0.66598000  | 1.77702500  |
| C | 0.33325400  | 1.42208800  | 1.72335000  |
| H | 1.22514600  | 2.44943500  | -0.53233800 |
| H | 0.03595900  | 1.74142400  | 2.71990800  |
| O | 2.35646900  | 0.21462600  | 2.37854500  |
| C | -1.95935100 | 1.74125900  | 0.74111100  |
| C | -2.85431300 | 2.63355900  | 0.13560000  |
| C | -2.48572700 | 0.71146400  | 1.53260900  |
| C | -4.22838500 | 2.46476700  | 0.27528700  |
| H | -2.47470000 | 3.47438400  | -0.43281200 |
| C | -3.85813600 | 0.53647200  | 1.66632700  |
| H | -1.80296000 | 0.03562700  | 2.03805000  |
| C | -4.73646500 | 1.40931500  | 1.02914100  |
| H | -4.90449400 | 3.16876600  | -0.19943400 |
| H | -4.24022600 | -0.28325900 | 2.26663400  |
| H | -5.80902200 | 1.27654600  | 1.13020400  |

---

|    |             |             |             |
|----|-------------|-------------|-------------|
| Cl | -0.56884000 | 2.63914700  | -2.06587400 |
| N  | 1.49426000  | -0.35381900 | -0.08753100 |
| N  | 0.32053900  | -1.08696000 | -0.12405800 |
| C  | -0.61155800 | -0.76981000 | -0.95662500 |
| H  | -0.37001000 | 0.00450900  | -1.67848300 |
| C  | 0.08662200  | -2.09797000 | 0.93568200  |
| H  | -0.30022300 | -1.54913900 | 1.80100100  |
| C  | -0.88223100 | -3.16551800 | 0.45019200  |
| H  | -1.13917400 | -3.82353700 | 1.28314900  |
| C  | -2.11519300 | -2.53587100 | -0.14696300 |
| C  | -3.39615700 | -3.05984100 | -0.03234300 |
| H  | -3.55767500 | -3.96792000 | 0.54092800  |
| C  | -4.47256300 | -2.41993900 | -0.64998600 |
| H  | -5.47007100 | -2.83429800 | -0.54463500 |
| C  | -4.28183300 | -1.25849100 | -1.39768700 |
| H  | -5.12613900 | -0.76575700 | -1.86671900 |
| C  | -3.00472400 | -0.72865700 | -1.53054300 |
| H  | -2.83337100 | 0.19054800  | -2.08454400 |
| C  | -1.93279200 | -1.36422400 | -0.89842700 |
| C  | 2.57503600  | -1.14925700 | -0.34158200 |
| O  | 2.50497400  | -2.34551500 | -0.64051000 |
| C  | 3.90471100  | -0.45820900 | -0.26768600 |
| C  | 4.03941400  | 0.92671000  | -0.15083000 |
| C  | 5.04828900  | -1.25582900 | -0.34201400 |
| C  | 5.30305000  | 1.50570400  | -0.10379200 |
| H  | 3.15391000  | 1.55043400  | -0.10191400 |
| C  | 6.31220900  | -0.67825700 | -0.29047600 |
| H  | 4.92159500  | -2.32851500 | -0.44141000 |
| C  | 6.44115100  | 0.70403900  | -0.17084200 |

---

|   |             |             |             |
|---|-------------|-------------|-------------|
| H | 5.40044400  | 2.58289000  | -0.01502000 |
| H | 7.19695200  | -1.30464600 | -0.34238500 |
| H | 7.42690400  | 1.15688700  | -0.13043600 |
| H | -0.37689900 | -3.77334700 | -0.31057500 |
| H | 1.05849100  | -2.52058200 | 1.17934900  |

**M3SR<sup>D</sup>**

|    |             |             |             |
|----|-------------|-------------|-------------|
| C  | 0.42378700  | -1.84697000 | 0.48415200  |
| C  | -0.15035500 | -2.20383400 | -0.68392800 |
| C  | -1.42419600 | -0.40776700 | 1.49423300  |
| C  | -0.41655900 | -1.35396600 | 1.57002400  |
| H  | -1.22190000 | -2.23644800 | -0.82187200 |
| H  | -0.20962800 | -1.71081600 | 2.57406100  |
| O  | -2.21996200 | 0.01283800  | 2.33475900  |
| C  | 1.89906400  | -1.88188600 | 0.70656800  |
| C  | 2.70689600  | -2.91540800 | 0.21643700  |
| C  | 2.50602300  | -0.84833700 | 1.42960400  |
| C  | 4.08399100  | -2.89195700 | 0.41185100  |
| H  | 2.24828000  | -3.74690000 | -0.30808900 |
| C  | 3.88438300  | -0.81400100 | 1.61380300  |
| H  | 1.87867400  | -0.06355400 | 1.84223600  |
| C  | 4.67915600  | -1.83514400 | 1.09910200  |
| H  | 4.69454300  | -3.70438000 | 0.03059200  |
| H  | 4.33645500  | 0.00924700  | 2.15822400  |
| H  | 5.75470000  | -1.81603500 | 1.24359200  |
| Cl | 0.69530500  | -2.46743700 | -2.20405700 |
| N  | -1.44387400 | 0.36605500  | 0.14772500  |
| N  | -0.28078900 | 1.13230100  | 0.06681600  |
| C  | 0.59080800  | 0.87172300  | -0.84965700 |

---

|   |             |             |             |
|---|-------------|-------------|-------------|
| H | 0.32557500  | 0.11234100  | -1.57850600 |
| C | -0.04145500 | 2.13760900  | 1.13015200  |
| H | 0.39068700  | 1.60217900  | 1.98167600  |
| C | 0.86819800  | 3.24154100  | 0.61233400  |
| H | 1.15964400  | 3.88211300  | 1.44706900  |
| C | 2.07883700  | 2.66329600  | -0.07623700 |
| C | 3.34822200  | 3.22141500  | -0.02404900 |
| H | 3.52092800  | 4.11586800  | 0.56653900  |
| C | 4.40206100  | 2.62924800  | -0.72409900 |
| H | 5.39240400  | 3.06897600  | -0.66423000 |
| C | 4.20235600  | 1.48333400  | -1.49375400 |
| H | 5.03169700  | 1.02977000  | -2.02417300 |
| C | 2.93503300  | 0.92182600  | -1.57060000 |
| H | 2.75448900  | 0.01519800  | -2.14194400 |
| C | 1.88591900  | 1.51067800  | -0.85733600 |
| C | -2.57359400 | 1.09443800  | -0.24123400 |
| O | -2.46396800 | 2.23267400  | -0.66701100 |
| C | -3.88147200 | 0.38015900  | -0.19286400 |
| C | -4.00145200 | -0.99588300 | 0.02004300  |
| C | -5.02345300 | 1.15040400  | -0.42308200 |
| C | -5.25770200 | -1.59065400 | 0.00437800  |
| H | -3.12207800 | -1.60466500 | 0.20301600  |
| C | -6.27873700 | 0.55405600  | -0.43015700 |
| H | -4.90573200 | 2.21478000  | -0.59501400 |
| C | -6.39623900 | -0.81772600 | -0.21661200 |
| H | -5.34840200 | -2.65906200 | 0.16861600  |
| H | -7.16401900 | 1.15690900  | -0.60334100 |
| H | -7.37544200 | -1.28598900 | -0.22298500 |
| H | 0.30658800  | 3.85824300  | -0.09985400 |

---

|                          |             |             |             |
|--------------------------|-------------|-------------|-------------|
| H                        | -1.02068400 | 2.51889700  | 1.41516800  |
| <b>TS4SR<sup>D</sup></b> |             |             |             |
| C                        | 0.59177200  | 1.56431900  | -0.01887500 |
| C                        | -0.06162800 | 1.70678400  | 1.16016000  |
| C                        | -0.97143800 | -0.14350900 | -1.17861300 |
| C                        | 0.25794500  | 0.56686300  | -1.02824900 |
| H                        | -0.94027200 | 1.13724600  | 1.42863300  |
| H                        | 0.72078600  | 0.74226800  | -1.99388000 |
| O                        | -1.63489400 | -0.33423800 | -2.17859800 |
| C                        | 1.78389000  | 2.39624200  | -0.36626200 |
| C                        | 1.76874600  | 3.78728600  | -0.21949000 |
| C                        | 2.92501100  | 1.78970300  | -0.90382500 |
| C                        | 2.87731500  | 4.54852800  | -0.57625400 |
| H                        | 0.87755600  | 4.27274100  | 0.16405600  |
| C                        | 4.03896900  | 2.54960700  | -1.24913400 |
| H                        | 2.93305100  | 0.71366700  | -1.05374000 |
| C                        | 4.01918200  | 3.93205300  | -1.08358600 |
| H                        | 2.84627100  | 5.62739700  | -0.46224500 |
| H                        | 4.91924000  | 2.06115700  | -1.65487600 |
| H                        | 4.88436500  | 4.52696500  | -1.35789800 |
| Cl                       | 0.44162400  | 2.76003500  | 2.46459200  |
| N                        | -1.37460200 | -0.92443700 | 0.04956600  |
| N                        | -0.40250600 | -1.89203200 | 0.29811700  |
| C                        | 0.78094000  | -1.33075500 | 0.54133400  |
| H                        | 0.77243000  | -0.42010800 | 1.13089300  |
| C                        | -0.44511700 | -3.07758000 | -0.58553200 |
| H                        | -0.23117300 | -2.73717300 | -1.60754500 |
| C                        | 0.58785400  | -4.08960100 | -0.11621400 |



---

|   |             |             |             |
|---|-------------|-------------|-------------|
| H | 0.62605200  | -4.92111800 | -0.82383300 |
| C | 1.94353300  | -3.45046900 | 0.03344400  |
| C | 3.13245200  | -4.16031100 | -0.09773400 |
| H | 3.10107000  | -5.20913400 | -0.37756600 |
| C | 4.35579100  | -3.53497700 | 0.13538400  |
| H | 5.27573800  | -4.09973700 | 0.02397700  |
| C | 4.40999000  | -2.19444800 | 0.52340300  |
| H | 5.36559300  | -1.72034900 | 0.71716500  |
| C | 3.23338500  | -1.47495800 | 0.66509000  |
| H | 3.25096600  | -0.43294100 | 0.97344600  |
| C | 2.00344000  | -2.09375900 | 0.39821400  |
| C | -2.69283200 | -1.28614500 | 0.34164100  |
| O | -2.94546900 | -2.35153400 | 0.87259800  |
| C | -3.75021000 | -0.27282000 | 0.04645900  |
| C | -3.49557400 | 1.09197800  | -0.11830000 |
| C | -5.06413600 | -0.74492600 | -0.00238600 |
| C | -4.55033900 | 1.97051400  | -0.33929700 |
| H | -2.48507800 | 1.48578400  | -0.06454200 |
| C | -6.11468500 | 0.13439700  | -0.23469900 |
| H | -5.24221700 | -1.80468400 | 0.14429300  |
| C | -5.85791300 | 1.49361400  | -0.40334100 |
| H | -4.34964400 | 3.02945800  | -0.46091500 |
| H | -7.13211600 | -0.23895500 | -0.28206600 |
| H | -6.67676000 | 2.18318100  | -0.58159200 |
| H | 0.27458600  | -4.49788000 | 0.85246300  |
| H | -1.45344300 | -3.48270600 | -0.53809700 |

**R1-H**

|   |            |             |            |
|---|------------|-------------|------------|
| C | 0.88196600 | -0.07021600 | 0.00022400 |
|---|------------|-------------|------------|

---

|   |             |             |             |
|---|-------------|-------------|-------------|
| C | 1.86809400  | 1.09360000  | 0.00047000  |
| C | 2.90979200  | -0.05536100 | -0.00007400 |
| C | 1.81900300  | -1.05150800 | -0.00003400 |
| H | 1.86960100  | 1.72195900  | -0.89503800 |
| H | 1.78317600  | -2.13422300 | 0.00007200  |
| O | 4.11503600  | -0.07878200 | -0.00050000 |
| C | -0.57267100 | -0.04574000 | 0.00013000  |
| C | -1.24408200 | 1.18266400  | -0.00005800 |
| C | -1.31452700 | -1.23637500 | 0.00016500  |
| C | -2.63450600 | 1.22237800  | -0.00022700 |
| H | -0.66994500 | 2.10477300  | -0.00003800 |
| C | -2.70158100 | -1.19430500 | 0.00002400  |
| H | -0.79553900 | -2.19055600 | 0.00033700  |
| C | -3.36294100 | 0.03523000  | -0.00019800 |
| H | -3.14948000 | 2.17722600  | -0.00038100 |
| H | -3.27157800 | -2.11735900 | 0.00008600  |
| H | -4.44769600 | 0.06536100  | -0.00033100 |
| H | 1.86990500  | 1.72087400  | 0.89676500  |

**R-R1-Me**

|   |             |             |             |
|---|-------------|-------------|-------------|
| C | 0.66845400  | -0.33634500 | -0.12967800 |
| C | 1.75423600  | 0.72826200  | -0.30644900 |
| C | 2.68743300  | -0.50532500 | -0.19456000 |
| C | 1.51637100  | -1.39229600 | -0.04454900 |
| H | 1.76754400  | 1.18874800  | -1.30161800 |
| H | 1.38525900  | -2.46049500 | 0.08353700  |
| O | 3.88795200  | -0.62660400 | -0.18943500 |
| C | -0.77878500 | -0.18856000 | -0.07141500 |
| C | -1.36701900 | 1.04802300  | -0.36449800 |

---

|   |             |             |             |
|---|-------------|-------------|-------------|
| C | -1.59827800 | -1.27619400 | 0.26503000  |
| C | -2.74985600 | 1.19426100  | -0.32731500 |
| H | -0.73712500 | 1.89129000  | -0.63224900 |
| C | -2.97746700 | -1.12729400 | 0.30493600  |
| H | -1.14466000 | -2.23507400 | 0.49847400  |
| C | -3.55512000 | 0.10836500  | 0.00817500  |
| H | -3.19915400 | 2.15445800  | -0.55799700 |
| H | -3.60536700 | -1.97195200 | 0.56810800  |
| H | -4.63369300 | 0.22346800  | 0.04067800  |
| C | 1.92371500  | 1.76879400  | 0.79312800  |
| H | 2.89446800  | 2.26085100  | 0.69263600  |
| H | 1.14723600  | 2.53674800  | 0.74880600  |
| H | 1.87977000  | 1.29465100  | 1.77826500  |

**S-R1-Me**

|   |             |             |             |
|---|-------------|-------------|-------------|
| C | -0.66843500 | -0.33629700 | -0.12950500 |
| C | -1.75430500 | 0.72831200  | -0.30637300 |
| C | -2.68743600 | -0.50539900 | -0.19456900 |
| C | -1.51632300 | -1.39226200 | -0.04462900 |
| H | -1.76750700 | 1.18879800  | -1.30155700 |
| H | -1.38508200 | -2.46044000 | 0.08352400  |
| O | -3.88792600 | -0.62686500 | -0.18955000 |
| C | 0.77880100  | -0.18844800 | -0.07127900 |
| C | 1.36708200  | 1.04808500  | -0.36442000 |
| C | 1.59826700  | -1.27612000 | 0.26514000  |
| C | 2.74993300  | 1.19420600  | -0.32737500 |
| H | 0.73726600  | 1.89142300  | -0.63213000 |
| C | 2.97747600  | -1.12733400 | 0.30492200  |
| H | 1.14461000  | -2.23497200 | 0.49862100  |

---

|   |             |             |             |
|---|-------------|-------------|-------------|
| C | 3.55517600  | 0.10828000  | 0.00808300  |
| H | 3.19927900  | 2.15436100  | -0.55814400 |
| H | 3.60531900  | -1.97205100 | 0.56803100  |
| H | 4.63375600  | 0.22335100  | 0.04045100  |
| C | -1.92391200 | 1.76890700  | 0.79304900  |
| H | -1.14724600 | 2.53668200  | 0.74889700  |
| H | -2.89448600 | 2.26121200  | 0.69214100  |
| H | -1.88043200 | 1.29498200  | 1.77830600  |

**TS1B-H**

|   |             |             |             |
|---|-------------|-------------|-------------|
| C | -0.91977200 | 0.25741500  | 0.35917000  |
| C | -1.68038600 | 1.40166600  | 0.04351200  |
| C | -2.89411800 | -0.27765700 | -0.04856900 |
| C | -1.83547100 | -0.76820900 | 0.68078000  |
| H | -2.37184800 | 1.79142700  | 0.77938500  |
| H | -1.77590900 | -1.66470200 | 1.28394500  |
| O | -3.86466500 | -0.36496800 | -0.71050100 |
| C | 0.52178000  | 0.08635200  | 0.14874200  |
| C | 1.35615700  | 1.20978300  | 0.08803600  |
| C | 1.08109300  | -1.19206000 | 0.02147100  |
| C | 2.72445000  | 1.05787600  | -0.10330700 |
| H | 0.92355500  | 2.19799100  | 0.21229100  |
| C | 2.45064800  | -1.34277700 | -0.15767000 |
| H | 0.43142700  | -2.06211000 | 0.03988800  |
| C | 3.27285100  | -0.21814600 | -0.22362200 |
| H | 3.36522900  | 1.93220800  | -0.14813400 |
| H | 2.87795600  | -2.33495500 | -0.25839300 |
| H | 4.34174900  | -0.33718500 | -0.36928700 |
| H | -1.33823000 | 2.11161300  | -0.70693800 |

---

**R-TS1B-Me**

|   |             |             |             |
|---|-------------|-------------|-------------|
| C | 0.77609800  | -0.10234400 | -0.49859800 |
| C | 1.66198300  | 0.99136900  | -0.37318700 |
| C | 2.68341200  | -0.76841400 | -0.05154900 |
| C | 1.57579000  | -1.25406300 | -0.70098800 |
| H | 2.36403900  | 1.14321600  | -1.18592100 |
| H | 1.40674600  | -2.20575300 | -1.18827800 |
| O | 3.64463400  | -0.83752900 | 0.63406600  |
| C | -0.66472500 | -0.11616300 | -0.21194300 |
| C | -1.43213400 | 1.04150000  | -0.39817300 |
| C | -1.29551700 | -1.29439800 | 0.20721400  |
| C | -2.80247100 | 1.01999600  | -0.16761200 |
| H | -0.94845800 | 1.94997700  | -0.74525200 |
| C | -2.66735000 | -1.31608600 | 0.43155100  |
| H | -0.69695400 | -2.18498500 | 0.37530200  |
| C | -3.42165900 | -0.15872500 | 0.24676300  |
| H | -3.39000500 | 1.91982100  | -0.31772200 |
| H | -3.14776000 | -2.23243600 | 0.75861900  |
| H | -4.49180800 | -0.17446600 | 0.42639600  |
| C | 1.48375900  | 2.14679100  | 0.57155400  |
| H | 2.41777900  | 2.31459800  | 1.11992200  |
| H | 1.24909600  | 3.08135100  | 0.04980600  |
| H | 0.69713500  | 1.95214500  | 1.30439800  |

**S-TS1B-Me**

|   |             |             |             |
|---|-------------|-------------|-------------|
| C | -0.77570300 | -0.10581500 | -0.49512200 |
| C | -1.66282700 | 0.98784200  | -0.37867500 |
| C | -2.68408500 | -0.77126700 | -0.04802800 |

---

|   |             |             |             |
|---|-------------|-------------|-------------|
| C | -1.57403100 | -1.25987300 | -0.69107300 |
| H | -2.36270000 | 1.13376900  | -1.19436400 |
| H | -1.40421300 | -2.21319400 | -1.17496700 |
| O | -3.64628500 | -0.83485100 | 0.63694200  |
| C | 0.66509000  | -0.11678500 | -0.20876100 |
| C | 1.42928300  | 1.04425300  | -0.38730200 |
| C | 1.29976800  | -1.29648000 | 0.20050700  |
| C | 2.79998200  | 1.02467400  | -0.15879700 |
| H | 0.94270600  | 1.95417500  | -0.72634400 |
| C | 2.67203900  | -1.31643600 | 0.42195000  |
| H | 0.70398000  | -2.18999700 | 0.36290500  |
| C | 3.42301000  | -0.15563700 | 0.24507500  |
| H | 3.38481900  | 1.92729600  | -0.30250600 |
| H | 3.15546200  | -2.23403200 | 0.74098200  |
| H | 4.49347100  | -0.16993600 | 0.42295000  |
| C | -1.48708100 | 2.14998400  | 0.55827100  |
| H | -1.24311700 | 3.07925900  | 0.03116500  |
| H | -2.42495500 | 2.32719300  | 1.09689300  |
| H | -0.70784300 | 1.95751300  | 1.29948500  |

**TS1-Con**

|   |             |             |             |
|---|-------------|-------------|-------------|
| C | 6.07907000  | -0.30704300 | 0.12046700  |
| C | 5.10022900  | 0.59663700  | 0.53179800  |
| C | 3.78097500  | 0.33155600  | 0.19690000  |
| C | 3.44059600  | -0.82197500 | -0.52353900 |
| C | 4.41237200  | -1.72656700 | -0.93495700 |
| C | 5.73691700  | -1.45075800 | -0.60361000 |
| C | 1.35751500  | 0.16892700  | -0.27596600 |
| C | -0.19557000 | -1.18194300 | -1.16533300 |

---

|   |             |             |             |
|---|-------------|-------------|-------------|
| C | 1.21277400  | -1.72880700 | -1.55980200 |
| H | 7.11738900  | -0.11433100 | 0.36556500  |
| H | 5.36232700  | 1.48682100  | 1.09303400  |
| H | 4.14122100  | -2.61527900 | -1.49418500 |
| H | 6.51370200  | -2.14014200 | -0.91588000 |
| H | -0.81918800 | -1.06205700 | -2.05340700 |
| H | 1.44258700  | -1.56096700 | -2.61667200 |
| N | 2.07041200  | -0.89335500 | -0.72507900 |
| S | 2.34951400  | 1.30561500  | 0.60428100  |
| N | 0.09502900  | 0.15296900  | -0.57584500 |
| C | -0.91386600 | -2.06897800 | -0.16865600 |
| C | -1.99403900 | -2.84300600 | -0.58542300 |
| C | -0.50676400 | -2.11854800 | 1.16743700  |
| C | -2.66704600 | -3.65789700 | 0.32192400  |
| H | -2.32829600 | -2.78638300 | -1.61808800 |
| C | -1.17778500 | -2.93235300 | 2.07336400  |
| H | 0.32031300  | -1.50028900 | 1.50910800  |
| C | -2.26149000 | -3.70271700 | 1.65228100  |
| H | -3.51793700 | -4.24527600 | -0.00845800 |
| H | -0.86080700 | -2.96003000 | 3.11099800  |
| H | -2.79053900 | -4.33043800 | 2.36207600  |
| H | 1.32776900  | -2.78648500 | -1.31628500 |
| C | -1.08942100 | 1.31281200  | 0.25615900  |
| C | -0.67894800 | 2.68531400  | -0.30993300 |
| C | -0.23237800 | 2.99240700  | 1.14388000  |
| C | -0.61153600 | 1.68550900  | 1.54599000  |
| H | 0.08291600  | 2.67400900  | -1.09173400 |
| H | -0.56880500 | 1.14367200  | 2.48311000  |
| O | 0.22328000  | 4.01652900  | 1.63210900  |

---

|    |             |             |             |
|----|-------------|-------------|-------------|
| C  | -2.37263000 | 0.62678600  | -0.06439600 |
| C  | -2.82677000 | 0.54697000  | -1.38364800 |
| C  | -3.13474800 | 0.06339300  | 0.95883600  |
| C  | -4.01954800 | -0.10538300 | -1.67786600 |
| H  | -2.23860900 | 1.00214200  | -2.17714000 |
| C  | -4.32345700 | -0.59732300 | 0.66529400  |
| H  | -2.78530000 | 0.13780900  | 1.98412700  |
| C  | -4.76685100 | -0.68347200 | -0.65250100 |
| H  | -4.36869800 | -0.15925600 | -2.70414400 |
| H  | -4.90221700 | -1.04749700 | 1.46542900  |
| H  | -5.69584800 | -1.19637300 | -0.88086900 |
| Cl | -2.00318400 | 3.74822000  | -0.91104100 |

**M1-Con**

|   |             |             |             |
|---|-------------|-------------|-------------|
| C | 6.06919700  | -0.36118800 | 0.08194600  |
| C | 5.11279600  | 0.50386700  | 0.61023500  |
| C | 3.78180500  | 0.28663900  | 0.28233300  |
| C | 3.41843000  | -0.78083600 | -0.54702500 |
| C | 4.36497500  | -1.64986200 | -1.07603200 |
| C | 5.69855300  | -1.42153700 | -0.74917100 |
| C | 1.36240600  | 0.18414800  | -0.13916800 |
| C | -0.24442800 | -1.09350900 | -1.12973500 |
| C | 1.15656500  | -1.58760400 | -1.59670000 |
| H | 7.11542600  | -0.20468900 | 0.31909800  |
| H | 5.39947200  | 1.32909700  | 1.25283900  |
| H | 4.06976500  | -2.47227800 | -1.71829400 |
| H | 6.46058100  | -2.08123800 | -1.14893900 |
| H | -0.87247300 | -0.87564700 | -1.99343500 |
| H | 1.35732600  | -1.34592900 | -2.64412200 |



---

|   |             |             |             |
|---|-------------|-------------|-------------|
| N | 2.04045900  | -0.80990400 | -0.73263900 |
| S | 2.36164000  | 1.21925400  | 0.82726500  |
| N | 0.07484100  | 0.17518900  | -0.41012000 |
| C | -0.95556000 | -2.06788400 | -0.21430900 |
| C | -2.08379400 | -2.74531600 | -0.66948300 |
| C | -0.49817400 | -2.28285800 | 1.08822900  |
| C | -2.75511100 | -3.63065300 | 0.17006400  |
| H | -2.45671500 | -2.55633600 | -1.67248600 |
| C | -1.16856300 | -3.16705400 | 1.92598500  |
| H | 0.36811100  | -1.74040700 | 1.46146800  |
| C | -2.30019500 | -3.84110800 | 1.46832400  |
| H | -3.64313500 | -4.14267500 | -0.18650600 |
| H | -0.81332300 | -3.32365500 | 2.93925700  |
| H | -2.82909900 | -4.52295500 | 2.12632000  |
| H | 1.28646700  | -2.65795800 | -1.42925600 |
| C | -0.90865900 | 1.19339200  | 0.18541700  |
| C | -0.56977300 | 2.63804200  | -0.32593600 |
| C | -0.27989900 | 2.99475200  | 1.15317300  |
| C | -0.49215000 | 1.66706200  | 1.53305800  |
| H | 0.27707000  | 2.67763900  | -1.01599000 |
| H | -0.43190700 | 1.12737200  | 2.47177100  |
| O | 0.02617800  | 4.08230200  | 1.64794600  |
| C | -2.30367900 | 0.64658500  | -0.04759700 |
| C | -2.85556700 | 0.59413900  | -1.33068300 |
| C | -3.03708300 | 0.14336000  | 1.02551800  |
| C | -4.11026500 | 0.02866200  | -1.53951400 |
| H | -2.30278400 | 1.00795700  | -2.17053500 |
| C | -4.28751800 | -0.43252600 | 0.81940700  |
| H | -2.61470900 | 0.19684900  | 2.02415500  |

---

|    |             |             |             |
|----|-------------|-------------|-------------|
| C  | -4.82530200 | -0.49395200 | -0.46376000 |
| H  | -4.53028700 | -0.00068300 | -2.54008200 |
| H  | -4.84092700 | -0.83528300 | 1.66188300  |
| H  | -5.80182700 | -0.94008000 | -0.62428300 |
| Cl | -1.86669600 | 3.62875700  | -1.09534100 |

**TS2-Con**

|   |             |             |             |
|---|-------------|-------------|-------------|
| C | 6.01343300  | -0.59537100 | 0.22827100  |
| C | 5.09301900  | 0.23363200  | 0.86677600  |
| C | 3.75770700  | 0.12815800  | 0.50411600  |
| C | 3.35357000  | -0.78643200 | -0.47499500 |
| C | 4.26602200  | -1.61397800 | -1.11832700 |
| C | 5.60400100  | -1.50309200 | -0.75156300 |
| C | 1.32858800  | 0.19150400  | 0.06618800  |
| C | -0.30376400 | -0.86063300 | -1.13658400 |
| C | 1.08706000  | -1.30006700 | -1.67901800 |
| H | 7.06173500  | -0.53109700 | 0.49695400  |
| H | 5.41141200  | 0.94202800  | 1.62373000  |
| H | 3.94035700  | -2.31640800 | -1.87771000 |
| H | 6.33922100  | -2.13528000 | -1.23694900 |
| H | -0.90552800 | -0.39388300 | -1.91960700 |
| H | 1.31743200  | -0.87434400 | -2.65950500 |
| N | 1.98030600  | -0.72253700 | -0.67406400 |
| S | 2.38281300  | 1.07209700  | 1.12929100  |
| N | 0.03309100  | 0.20150100  | -0.14932100 |
| C | -1.04034400 | -2.00487100 | -0.47161400 |
| C | -2.19984100 | -2.52699800 | -1.03837300 |
| C | -0.52951800 | -2.57497200 | 0.69801600  |
| C | -2.84775400 | -3.60678000 | -0.44001700 |

---

|    |             |             |             |
|----|-------------|-------------|-------------|
| H  | -2.60890900 | -2.07577300 | -1.93809400 |
| C  | -1.17260100 | -3.65362300 | 1.29285500  |
| H  | 0.36955500  | -2.16705500 | 1.15500300  |
| C  | -2.33536200 | -4.17220400 | 0.72352500  |
| H  | -3.75786300 | -3.99978500 | -0.88172200 |
| H  | -0.77049400 | -4.08765300 | 2.20255100  |
| H  | -2.84175100 | -5.01075000 | 1.19037000  |
| H  | 1.18296400  | -2.38620100 | -1.70826800 |
| C  | -0.90551100 | 1.37699900  | 0.12641500  |
| C  | -0.69897900 | 2.27153700  | -1.08286200 |
| C  | 0.02982200  | 3.28914000  | 0.91335500  |
| C  | -0.42369600 | 2.09934200  | 1.33940900  |
| H  | 0.32417300  | 2.56993300  | -1.29450800 |
| H  | -0.49595900 | 1.84643800  | 2.39617300  |
| O  | 0.46109900  | 4.37988500  | 0.86451900  |
| C  | -2.29919300 | 0.76565600  | 0.26831700  |
| C  | -3.18686100 | 0.73442700  | -0.80705900 |
| C  | -2.66735500 | 0.14929100  | 1.46698100  |
| C  | -4.42718400 | 0.11088200  | -0.68123200 |
| H  | -2.89307600 | 1.19963900  | -1.74162500 |
| C  | -3.89799800 | -0.48672700 | 1.59015500  |
| H  | -1.97823800 | 0.14503800  | 2.30702200  |
| C  | -4.78527900 | -0.50233800 | 0.51510400  |
| H  | -5.11166700 | 0.10283500  | -1.52401100 |
| H  | -4.16412100 | -0.97182500 | 2.52405500  |
| H  | -5.74928400 | -0.99216500 | 0.61186900  |
| Cl | -1.84996500 | 3.62447200  | -1.32081700 |

**TS3RR-90**

S91/S147

---

|   |             |             |             |
|---|-------------|-------------|-------------|
| C | 7.15864300  | -0.86318400 | -1.31604700 |
| C | 6.09188900  | 0.00484700  | -1.52683000 |
| C | 4.80840900  | -0.45490100 | -1.25547300 |
| C | 4.60978100  | -1.75806700 | -0.78203100 |
| C | 5.66960500  | -2.63283900 | -0.57062200 |
| C | 6.94903300  | -2.16385300 | -0.84516700 |
| C | 2.46116000  | -0.96105800 | -0.83404200 |
| C | 1.02049900  | -2.66590200 | -0.21554900 |
| C | 2.49999100  | -3.16609700 | -0.14342100 |
| H | 8.16797700  | -0.52279800 | -1.51829000 |
| H | 6.25484200  | 1.01376200  | -1.88957700 |
| H | 5.49962500  | -3.63748000 | -0.19936800 |
| H | 7.79809000  | -2.81925700 | -0.68602300 |
| H | 0.48322100  | -3.17736000 | -1.02051000 |
| H | 2.68579100  | -4.01242600 | -0.80705500 |
| N | 3.25556800  | -1.99996600 | -0.58777800 |
| S | 3.28157900  | 0.41838000  | -1.44717100 |
| N | 1.17336700  | -1.23631600 | -0.62201900 |
| C | 0.29282600  | -2.86389800 | 1.09229300  |
| C | -0.88855100 | -3.60507300 | 1.12564500  |
| C | 0.81375800  | -2.31956100 | 2.26877300  |
| C | -1.55959800 | -3.79976100 | 2.33125200  |
| H | -1.29083700 | -4.02315800 | 0.20522100  |
| C | 0.14181000  | -2.51908200 | 3.47136300  |
| H | 1.69262000  | -1.67820600 | 2.23176400  |
| C | -1.04149800 | -3.25555700 | 3.50483300  |
| H | -2.47972300 | -4.37455400 | 2.35201200  |
| H | 0.53464100  | -2.07968600 | 4.38214900  |
| H | -1.56196900 | -3.40198000 | 4.44587800  |

---

|    |             |             |             |
|----|-------------|-------------|-------------|
| H  | 2.78175200  | -3.42904000 | 0.87828000  |
| C  | -2.23663800 | 0.10542000  | -1.54283200 |
| C  | -2.08685700 | 1.36834900  | -1.98173700 |
| C  | 0.17278300  | -0.26482700 | -0.97087800 |
| C  | -1.20339300 | -0.56470900 | -0.72934900 |
| H  | -1.19294500 | 1.94872600  | -1.81776700 |
| H  | -1.43138600 | -1.59799100 | -0.49247300 |
| O  | 0.61538100  | 0.78517100  | -1.43548200 |
| C  | -3.46450500 | -0.69994400 | -1.80589800 |
| C  | -4.73920800 | -0.19114200 | -1.53969400 |
| C  | -3.35122200 | -2.00661800 | -2.29462400 |
| C  | -5.87185900 | -0.96577400 | -1.76436000 |
| H  | -4.83413400 | 0.80483700  | -1.11760200 |
| C  | -4.48453300 | -2.78010300 | -2.52901800 |
| H  | -2.36485500 | -2.41293600 | -2.50352000 |
| C  | -5.74952600 | -2.26086400 | -2.26415200 |
| H  | -6.85275000 | -0.55939400 | -1.53709700 |
| H  | -4.37898200 | -3.78751100 | -2.91922100 |
| H  | -6.63454800 | -2.86375400 | -2.44190000 |
| Cl | -3.24752400 | 2.21151000  | -2.98760400 |
| N  | 0.70523700  | 0.62677600  | 1.84718500  |
| N  | -0.52826000 | 1.17685600  | 1.47724100  |
| C  | -1.42613300 | 0.19784100  | 1.24311500  |
| H  | -1.11324300 | -0.77530100 | 1.60656800  |
| C  | -1.00337200 | 2.46030700  | 2.01545000  |
| H  | -0.20912900 | 3.19732600  | 1.92479500  |
| C  | -2.25145000 | 2.90673500  | 1.26430300  |
| H  | -1.99263900 | 3.09177300  | 0.21363800  |
| C  | -3.30184400 | 1.83049100  | 1.35878000  |

---

|   |             |             |             |
|---|-------------|-------------|-------------|
| C | -4.66012200 | 2.09784900  | 1.51748300  |
| H | -5.00309400 | 3.12890700  | 1.52242600  |
| C | -5.56964400 | 1.05663100  | 1.69639300  |
| H | -6.62412600 | 1.27809800  | 1.82814700  |
| C | -5.12623000 | -0.26489600 | 1.72414200  |
| H | -5.83374000 | -1.07447000 | 1.86960500  |
| C | -3.77497200 | -0.54255500 | 1.55435800  |
| H | -3.41211800 | -1.56842300 | 1.56428900  |
| C | -2.86350900 | 0.49911200  | 1.36653500  |
| C | 1.86888500  | 1.18860200  | 1.53430600  |
| O | 2.92001500  | 0.52831100  | 1.75130300  |
| C | 2.08744300  | 2.59507900  | 0.99118700  |
| C | 1.27494400  | 3.25279900  | 0.06097200  |
| C | 3.24335700  | 3.24372200  | 1.44109900  |
| C | 1.60975400  | 4.52599100  | -0.39728500 |
| H | 0.39353700  | 2.75420100  | -0.32323400 |
| C | 3.56710700  | 4.52295100  | 1.00216500  |
| H | 3.88582500  | 2.71141600  | 2.13375500  |
| C | 2.75009600  | 5.16936200  | 0.07633500  |
| H | 0.97404800  | 5.01473400  | -1.12966900 |
| H | 4.46110100  | 5.01318900  | 1.37603400  |
| H | 3.00274600  | 6.16475800  | -0.27614900 |
| H | -1.22754000 | 2.32526200  | 3.08299700  |
| H | -2.62264700 | 3.84472900  | 1.68628700  |

**TS3RR-180**

|   |             |            |             |
|---|-------------|------------|-------------|
| C | -8.04959300 | 0.71325700 | 0.27907000  |
| C | -7.02742200 | 1.18936900 | -0.53494500 |
| C | -5.71609000 | 0.92621300 | -0.15449100 |

---

|   |             |             |             |
|---|-------------|-------------|-------------|
| C | -5.44658300 | 0.21059200  | 1.01815100  |
| C | -6.46340900 | -0.26674200 | 1.83852900  |
| C | -7.77057500 | -0.00350200 | 1.44865000  |
| C | -3.32539600 | 0.62216100  | 0.24681800  |
| C | -1.80194200 | -0.23431300 | 1.75890800  |
| C | -3.25622600 | -0.57455800 | 2.22053600  |
| H | -9.08005900 | 0.90359700  | 0.00149400  |
| H | -7.24615800 | 1.74635000  | -1.43898300 |
| H | -6.23995300 | -0.81988600 | 2.74396400  |
| H | -8.58837300 | -0.36023700 | 2.06446500  |
| H | -1.36278900 | 0.51490100  | 2.42462600  |
| H | -3.48275500 | -0.17229200 | 3.20897400  |
| N | -4.07295600 | 0.08113800  | 1.20168400  |
| S | -4.22644200 | 1.43707500  | -0.96771800 |
| N | -2.01286800 | 0.42244300  | 0.43043800  |
| C | -0.94223100 | -1.47310500 | 1.73467700  |
| C | 0.04416000  | -1.64407100 | 2.70610300  |
| C | -1.20645600 | -2.49408500 | 0.82164400  |
| C | 0.75338900  | -2.84112000 | 2.77571500  |
| H | 0.24935800  | -0.84904100 | 3.41824700  |
| C | -0.49077700 | -3.68486300 | 0.88886600  |
| H | -1.95899300 | -2.35365700 | 0.04734300  |
| C | 0.48644800  | -3.86242200 | 1.86774500  |
| H | 1.50907100  | -2.97507700 | 3.54274500  |
| H | -0.69002000 | -4.47145800 | 0.16777100  |
| H | 1.04181100  | -4.79309400 | 1.91815600  |
| H | -3.43791200 | -1.65154700 | 2.20547700  |
| C | 1.22886300  | 2.13780500  | -0.01938600 |
| C | 1.04117800  | 3.21986800  | -0.78969200 |

---

|    |             |             |             |
|----|-------------|-------------|-------------|
| C  | -1.06796000 | 1.23643100  | -0.29522100 |
| C  | 0.33442200  | 0.94586300  | -0.15418000 |
| H  | 0.28291100  | 3.27713700  | -1.55561000 |
| H  | 0.56166600  | 0.15292500  | 0.55302200  |
| O  | -1.56090300 | 2.06714300  | -1.05237400 |
| C  | 2.27786900  | 2.05015400  | 1.03363000  |
| C  | 3.61143200  | 2.36928700  | 0.76089500  |
| C  | 1.94493600  | 1.58516200  | 2.31119000  |
| C  | 4.58697700  | 2.20120700  | 1.73913500  |
| H  | 3.89858600  | 2.68567800  | -0.23533500 |
| C  | 2.91778000  | 1.42931100  | 3.29310200  |
| H  | 0.90752600  | 1.35159000  | 2.53732100  |
| C  | 4.24723700  | 1.73192100  | 3.00533700  |
| H  | 5.62245200  | 2.41757300  | 1.49654900  |
| H  | 2.63845800  | 1.07097900  | 4.27957900  |
| H  | 5.01338500  | 1.59587400  | 3.76211200  |
| Cl | 1.91778700  | 4.71989200  | -0.61668400 |
| N  | 3.00349700  | 0.69644900  | -2.16755700 |
| N  | 2.04085800  | -0.29922600 | -1.93432400 |
| C  | 0.75623600  | 0.14221400  | -1.91517500 |
| H  | 0.62708400  | 1.12309500  | -2.38271600 |
| C  | 2.33530800  | -1.66717600 | -2.37444700 |
| H  | 3.35538900  | -1.91077300 | -2.08661900 |
| C  | 1.35468800  | -2.63344200 | -1.73511600 |
| H  | 1.46909200  | -2.58231300 | -0.64320900 |
| C  | -0.03363700 | -2.23108200 | -2.14135900 |
| C  | -1.02135100 | -3.15933800 | -2.46673100 |
| H  | -0.79146100 | -4.22001100 | -2.40169900 |
| C  | -2.28242200 | -2.74173100 | -2.88239300 |



---

|   |             |             |             |
|---|-------------|-------------|-------------|
| H | -3.04533900 | -3.47400500 | -3.12730900 |
| C | -2.54460500 | -1.37937600 | -3.02045800 |
| H | -3.50991600 | -1.04097700 | -3.38411600 |
| C | -1.55337100 | -0.44707100 | -2.72991400 |
| H | -1.74280500 | 0.61008500  | -2.88198400 |
| C | -0.30195100 | -0.85894100 | -2.25448800 |
| C | 4.18926000  | 0.54830300  | -1.57335300 |
| O | 5.13303100  | 1.33371700  | -1.82021300 |
| C | 4.51441900  | -0.54453100 | -0.55735300 |
| C | 3.64382600  | -0.99556800 | 0.44015400  |
| C | 5.81211500  | -1.06219500 | -0.59286200 |
| C | 4.06162000  | -1.94640500 | 1.36801600  |
| H | 2.63945400  | -0.59014200 | 0.50290900  |
| C | 6.22525300  | -2.03028300 | 0.31746700  |
| H | 6.49178000  | -0.67705700 | -1.34574700 |
| C | 5.34913900  | -2.47542900 | 1.30519100  |
| H | 3.37564900  | -2.26915700 | 2.14520100  |
| H | 7.23372300  | -2.42977600 | 0.26329300  |
| H | 5.67019000  | -3.22222300 | 2.02528100  |
| H | 2.26866400  | -1.71679700 | -3.47156400 |
| H | 1.56689600  | -3.66074400 | -2.04529000 |

**TS3RR-270**

|   |             |             |             |
|---|-------------|-------------|-------------|
| C | -6.58533700 | -1.78441400 | -1.72064200 |
| C | -5.39739400 | -2.42836200 | -1.39184000 |
| C | -4.22124500 | -1.68767300 | -1.44107100 |
| C | -4.24339200 | -0.33971700 | -1.82101000 |
| C | -5.42811900 | 0.31083800  | -2.14886200 |
| C | -6.59932500 | -0.43424500 | -2.09099200 |

---

|   |             |             |             |
|---|-------------|-------------|-------------|
| C | -2.01206800 | -0.64300800 | -1.37774000 |
| C | -0.90209500 | 1.24348600  | -2.02932600 |
| C | -2.41318600 | 1.54513600  | -1.92813300 |
| H | -7.51601800 | -2.33894200 | -1.68439000 |
| H | -5.38783700 | -3.47250100 | -1.09981400 |
| H | -5.43184000 | 1.35798500  | -2.42980000 |
| H | -7.54163000 | 0.04278500  | -2.33562300 |
| H | -0.65795000 | 0.98360900  | -3.06557300 |
| H | -2.79095300 | 2.04627900  | -2.81888200 |
| N | -2.95797300 | 0.19212100  | -1.79821800 |
| S | -2.57659100 | -2.23766300 | -1.07520900 |
| N | -0.81187000 | -0.05666700 | -1.25245300 |
| C | -0.05670300 | 2.41062200  | -1.60049600 |
| C | 0.66877600  | 3.11396600  | -2.56261700 |
| C | -0.05077400 | 2.84545400  | -0.27575300 |
| C | 1.40217600  | 4.24084100  | -2.19165400 |
| H | 0.66766000  | 2.78033900  | -3.59686600 |
| C | 0.71424000  | 3.94090700  | 0.10733000  |
| H | -0.61924400 | 2.29875100  | 0.46644900  |
| C | 1.43619300  | 4.64453000  | -0.85812400 |
| H | 1.96251700  | 4.78776700  | -2.94300200 |
| H | 0.73103300  | 4.21331600  | 1.15914200  |
| H | 2.02845000  | 5.50744800  | -0.57038000 |
| H | -2.65707100 | 2.11890800  | -1.02690800 |
| C | 2.86045700  | -0.59379000 | -1.02526700 |
| C | 3.06135900  | -1.78277000 | -1.61825400 |
| C | 0.35367600  | -0.88997700 | -0.98033300 |
| C | 1.52481100  | -0.21523700 | -0.51412800 |
| H | 2.27815100  | -2.51933200 | -1.72495200 |

---

|    |             |             |             |
|----|-------------|-------------|-------------|
| H  | 1.39872200  | 0.84876100  | -0.36558800 |
| O  | 0.17113400  | -2.09914400 | -1.08507600 |
| C  | 3.93400000  | 0.41500900  | -0.78020800 |
| C  | 5.19032700  | 0.04985900  | -0.27867400 |
| C  | 3.67746300  | 1.77426900  | -0.99895300 |
| C  | 6.15874600  | 1.01358600  | -0.01388600 |
| H  | 5.41589700  | -0.99432000 | -0.09120600 |
| C  | 4.64796400  | 2.73646200  | -0.74389100 |
| H  | 2.71437300  | 2.08700500  | -1.38807700 |
| C  | 5.89371200  | 2.36037300  | -0.24859800 |
| H  | 7.12229800  | 0.70799600  | 0.38114500  |
| H  | 4.42128900  | 3.78216400  | -0.92915700 |
| H  | 6.65039900  | 3.11045100  | -0.04234200 |
| Cl | 4.56515200  | -2.30638100 | -2.33352100 |
| N  | 0.78553900  | 1.21808500  | 2.60287500  |
| N  | 0.56043300  | -0.11951100 | 2.21334300  |
| C  | 1.60309300  | -0.64911500 | 1.51976500  |
| H  | 2.49400600  | -0.02378000 | 1.55000000  |
| C  | -0.18858600 | -1.02537800 | 3.09657600  |
| H  | -1.08763700 | -0.52232500 | 3.44199100  |
| C  | -0.53407700 | -2.29934500 | 2.33807300  |
| H  | -1.15311300 | -2.04358800 | 1.46686200  |
| C  | 0.74452700  | -2.95563800 | 1.89765300  |
| C  | 0.93147900  | -4.33338700 | 1.89474000  |
| H  | 0.10374100  | -4.98321500 | 2.16552600  |
| C  | 2.17340500  | -4.87736900 | 1.57175700  |
| H  | 2.30927700  | -5.95422900 | 1.57205700  |
| C  | 3.24792700  | -4.03895900 | 1.28637400  |
| H  | 4.22602900  | -4.45617900 | 1.07017500  |

---

|   |             |             |            |
|---|-------------|-------------|------------|
| C | 3.06859300  | -2.65911200 | 1.28758300 |
| H | 3.90721000  | -1.99881000 | 1.09754200 |
| C | 1.81308200  | -2.10835000 | 1.56188400 |
| C | -0.24982900 | 2.03081600  | 2.80268100 |
| O | -0.05526100 | 3.21696600  | 3.16691400 |
| C | -1.73212600 | 1.67757200  | 2.61205800 |
| C | -2.23513700 | 0.74510200  | 1.69690600 |
| C | -2.65026300 | 2.42532500  | 3.35596500 |
| C | -3.60738700 | 0.55577600  | 1.54122400 |
| H | -1.53740400 | 0.15423900  | 1.11521100 |
| C | -4.02119900 | 2.23370800  | 3.21286900 |
| H | -2.25569200 | 3.16921600  | 4.03831800 |
| C | -4.50746200 | 1.29867300  | 2.30094300 |
| H | -3.98019700 | -0.18865900 | 0.84154100 |
| H | -4.71271700 | 2.81940600  | 3.81089100 |
| H | -5.57609500 | 1.14642400  | 2.18548900 |
| H | 0.42915700  | -1.26301300 | 3.97490800 |
| H | -1.11865800 | -2.97243200 | 2.97138700 |

**TS3RS-90**

|   |             |             |             |
|---|-------------|-------------|-------------|
| C | -6.06206700 | -4.22753800 | -1.32585700 |
| C | -4.77074100 | -3.98672500 | -1.78420100 |
| C | -4.09673300 | -2.87959500 | -1.28221000 |
| C | -4.71341100 | -2.03599800 | -0.34961100 |
| C | -6.00505200 | -2.26789800 | 0.11036600  |
| C | -6.66985400 | -3.37925000 | -0.39354800 |
| C | -2.66872400 | -1.02453100 | -0.58737700 |
| C | -2.59278200 | 0.84898100  | 0.75672600  |
| C | -3.98524300 | 0.14803000  | 0.90542700  |

---

|   |             |             |             |
|---|-------------|-------------|-------------|
| H | -6.60488600 | -5.08823500 | -1.69978800 |
| H | -4.30314500 | -4.64372800 | -2.50874100 |
| H | -6.46838500 | -1.60431900 | 0.83217200  |
| H | -7.67843300 | -3.59047900 | -0.05652700 |
| H | -2.69985600 | 1.81716500  | 0.25833200  |
| H | -4.81332100 | 0.78590400  | 0.59183700  |
| N | -3.85971300 | -0.99549400 | 0.00295500  |
| S | -2.47331000 | -2.30763600 | -1.71418200 |
| N | -1.85328800 | -0.05228500 | -0.17700200 |
| C | -1.92744700 | 1.03512900  | 2.09838300  |
| C | -1.81446700 | 2.31586800  | 2.63511100  |
| C | -1.52502900 | -0.07320300 | 2.84748500  |
| C | -1.33062200 | 2.48875700  | 3.93122700  |
| H | -2.10726600 | 3.17764900  | 2.04012600  |
| C | -1.05038200 | 0.10079600  | 4.14111800  |
| H | -1.58684700 | -1.07130100 | 2.41769400  |
| C | -0.96242000 | 1.38152500  | 4.68738500  |
| H | -1.24600500 | 3.48744400  | 4.34707000  |
| H | -0.73549900 | -0.76024400 | 4.72073700  |
| H | -0.58547900 | 1.51336400  | 5.69662600  |
| H | -4.15014800 | -0.19872900 | 1.92765500  |
| C | 0.55475600  | 2.41127100  | -1.46112400 |
| C | 1.31550600  | 2.07710600  | -2.51267500 |
| C | -0.71120600 | 0.32645700  | -1.00680400 |
| C | 0.12540200  | 1.36261000  | -0.49234300 |
| H | 1.67719200  | 1.06287300  | -2.68394300 |
| H | -0.20566000 | 1.76795700  | 0.45869300  |
| O | -0.56033900 | -0.33051300 | -2.02462600 |
| C | 0.02123300  | 3.77897100  | -1.19283400 |

---

|    |             |             |             |
|----|-------------|-------------|-------------|
| C  | 0.12109600  | 4.34703200  | 0.08377200  |
| C  | -0.65794000 | 4.49321900  | -2.18662600 |
| C  | -0.42118600 | 5.59978600  | 0.35414400  |
| H  | 0.63178600  | 3.80652200  | 0.87631500  |
| C  | -1.20594200 | 5.74378600  | -1.91614600 |
| H  | -0.76521800 | 4.05679300  | -3.17402200 |
| C  | -1.08754600 | 6.30401600  | -0.64652200 |
| H  | -0.32082500 | 6.02599800  | 1.34762100  |
| H  | -1.73170100 | 6.27899700  | -2.70057100 |
| H  | -1.51383300 | 7.27999700  | -0.43778300 |
| Cl | 1.86060200  | 3.21533800  | -3.72480800 |
| N  | 2.39267400  | -0.88250300 | -2.09486000 |
| N  | 1.94353300  | -0.90688900 | -0.75673400 |
| C  | 1.84472500  | 0.22126200  | -0.05555700 |
| H  | 2.44877900  | 1.03043500  | -0.46022100 |
| C  | 1.30231900  | -2.10419700 | -0.21627100 |
| H  | 1.49121200  | -2.91647100 | -0.91806000 |
| C  | 1.83487800  | -2.41876600 | 1.17804400  |
| H  | 2.83851800  | -2.85543900 | 1.10951000  |
| C  | 1.89553400  | -1.17231500 | 2.02715300  |
| C  | 2.09098500  | -1.25620500 | 3.40797600  |
| H  | 2.15606400  | -2.23812100 | 3.87063600  |
| C  | 2.22594200  | -0.11176300 | 4.18367500  |
| H  | 2.38530900  | -0.19728800 | 5.25431200  |
| C  | 2.15066700  | 1.14666200  | 3.58509800  |
| H  | 2.24809800  | 2.04607900  | 4.18451000  |
| C  | 1.94932300  | 1.24311700  | 2.21646200  |
| H  | 1.92173600  | 2.21689900  | 1.73345100  |
| C  | 1.83187500  | 0.09336100  | 1.42769300  |

---

|   |            |             |             |
|---|------------|-------------|-------------|
| C | 3.54360600 | -1.54998700 | -2.27163200 |
| O | 4.03384700 | -1.74986500 | -3.39633600 |
| C | 4.30112400 | -2.12170800 | -1.08119100 |
| C | 4.77876200 | -1.31866800 | -0.04153500 |
| C | 4.56524500 | -3.49194800 | -1.05208500 |
| C | 5.48251800 | -1.87941500 | 1.02090200  |
| H | 4.59485500 | -0.24796800 | -0.06250500 |
| C | 5.24736300 | -4.06107000 | 0.02123000  |
| H | 4.22405700 | -4.10715000 | -1.87985900 |
| C | 5.70442400 | -3.25530600 | 1.06312300  |
| H | 5.84802600 | -1.24385300 | 1.82193800  |
| H | 5.43027900 | -5.13130600 | 0.04172400  |
| H | 6.23926900 | -3.69644000 | 1.89861800  |
| H | 0.21462700 | -1.94431600 | -0.16389400 |
| H | 1.18797000 | -3.16397700 | 1.65407100  |

**TS3RS-180**

|   |             |             |             |
|---|-------------|-------------|-------------|
| C | -7.28761700 | -1.86532900 | -1.54957100 |
| C | -5.95924200 | -2.20642000 | -1.78181500 |
| C | -4.97546000 | -1.32002200 | -1.35796400 |
| C | -5.32576900 | -0.12139900 | -0.72335200 |
| C | -6.65163600 | 0.22702800  | -0.49005900 |
| C | -7.62805900 | -0.66557900 | -0.91418600 |
| C | -3.03754300 | 0.03016300  | -0.74643100 |
| C | -2.42789100 | 1.92877600  | 0.41920000  |
| C | -3.95574400 | 1.95631200  | 0.12412500  |
| H | -8.07142300 | -2.54243500 | -1.86935500 |
| H | -5.69848600 | -3.13364000 | -2.27932100 |
| H | -6.90560400 | 1.15868000  | 0.00339400  |

---

|   |             |             |             |
|---|-------------|-------------|-------------|
| H | -8.67223800 | -0.42593300 | -0.74840200 |
| H | -1.93854800 | 2.81820200  | 0.01831700  |
| H | -4.22718500 | 2.68175300  | -0.64640600 |
| N | -4.18466600 | 0.60192500  | -0.38911100 |
| S | -3.21940700 | -1.47167400 | -1.55344000 |
| N | -1.96959900 | 0.74830000  | -0.38859200 |
| C | -2.12263200 | 1.77362000  | 1.89314700  |
| C | -1.13601900 | 2.55190300  | 2.49714700  |
| C | -2.82427600 | 0.83734100  | 2.65895500  |
| C | -0.83007900 | 2.37534100  | 3.84588700  |
| H | -0.59191700 | 3.29179900  | 1.91395900  |
| C | -2.52410400 | 0.66547700  | 4.00497600  |
| H | -3.59591600 | 0.22121000  | 2.20174500  |
| C | -1.51995800 | 1.42992400  | 4.59887400  |
| H | -0.05328600 | 2.97817400  | 4.30374100  |
| H | -3.06968700 | -0.06788200 | 4.58987500  |
| H | -1.28100100 | 1.29065400  | 5.64782200  |
| H | -4.53714400 | 2.13613500  | 1.02859200  |
| C | 1.38314200  | 1.93019000  | -1.23624500 |
| C | 1.61605400  | 1.60265000  | -2.51147900 |
| C | -0.68264000 | 0.50997900  | -0.99860400 |
| C | 0.44757700  | 1.15617100  | -0.38167700 |
| H | 1.14258900  | 0.77037500  | -3.01208000 |
| H | 0.18187500  | 1.70454700  | 0.51715000  |
| O | -0.67925900 | -0.27769000 | -1.93491000 |
| C | 2.01550800  | 3.11076300  | -0.57456300 |
| C | 3.38888200  | 3.15892200  | -0.32019700 |
| C | 1.20893300  | 4.18859800  | -0.19165400 |
| C | 3.93709600  | 4.27437200  | 0.30973400  |



---

|    |             |             |             |
|----|-------------|-------------|-------------|
| H  | 3.99099000  | 2.29566500  | -0.58957900 |
| C  | 1.76061200  | 5.30206900  | 0.43609600  |
| H  | 0.14343800  | 4.16408800  | -0.41223800 |
| C  | 3.13011300  | 5.34474300  | 0.68938100  |
| H  | 5.00379100  | 4.30340300  | 0.50932800  |
| H  | 1.12567700  | 6.13608300  | 0.71878500  |
| H  | 3.56613400  | 6.20976900  | 1.17935900  |
| Cl | 2.68799200  | 2.50137200  | -3.55166400 |
| N  | 3.69962300  | 0.02358900  | -0.51245900 |
| N  | 2.51377300  | -0.74084600 | -0.49029000 |
| C  | 1.52055800  | -0.37723000 | 0.33594500  |
| H  | 1.88105300  | 0.19825900  | 1.18739100  |
| C  | 2.23501800  | -1.66523400 | -1.59089000 |
| H  | 3.19073100  | -1.87705800 | -2.07148700 |
| C  | 1.60220600  | -2.94304900 | -1.05074000 |
| H  | 2.37526300  | -3.54942300 | -0.55987500 |
| C  | 0.51904600  | -2.64909100 | -0.04168900 |
| C  | -0.44622500 | -3.60836000 | 0.27165300  |
| H  | -0.44213200 | -4.55225000 | -0.26766400 |
| C  | -1.39579400 | -3.37733800 | 1.26119100  |
| H  | -2.13711500 | -4.13682700 | 1.48986500  |
| C  | -1.38098200 | -2.17460900 | 1.96832600  |
| H  | -2.09848400 | -1.99426800 | 2.76280200  |
| C  | -0.42829600 | -1.20970000 | 1.66255600  |
| H  | -0.40257200 | -0.27295900 | 2.21579700  |
| C  | 0.51080600  | -1.43037600 | 0.65124400  |
| C  | 4.77608200  | -0.67105400 | -0.12393100 |
| O  | 5.92959300  | -0.20311700 | -0.17470000 |
| C  | 4.63755600  | -2.10179100 | 0.38061400  |

---

|   |            |             |             |
|---|------------|-------------|-------------|
| C | 3.87563400 | -2.43002300 | 1.50604400  |
| C | 5.33369100 | -3.11524400 | -0.28030900 |
| C | 3.79384700 | -3.74741600 | 1.94853800  |
| H | 3.34136500 | -1.64713100 | 2.03739800  |
| C | 5.23548900 | -4.43897500 | 0.14394500  |
| H | 5.94866800 | -2.85297200 | -1.13648400 |
| C | 4.46325500 | -4.75854600 | 1.25957800  |
| H | 3.19988600 | -3.98796400 | 2.82529000  |
| H | 5.76770100 | -5.22088700 | -0.38967600 |
| H | 4.38965700 | -5.78830400 | 1.59566100  |
| H | 1.56957100 | -1.19908300 | -2.32476600 |
| H | 1.19556400 | -3.53596300 | -1.87635900 |

**TS3RS-270**

|   |            |             |             |
|---|------------|-------------|-------------|
| C | 8.07149700 | -0.64288900 | 0.35257600  |
| C | 7.09264200 | 0.10031000  | 1.00516200  |
| C | 5.78957600 | 0.02472900  | 0.52742400  |
| C | 5.48394300 | -0.78007800 | -0.57729700 |
| C | 6.45704200 | -1.52200500 | -1.23728300 |
| C | 7.75754500 | -1.43986000 | -0.75390200 |
| C | 3.42413800 | 0.10294900  | -0.08122000 |
| C | 1.86891400 | -0.88475400 | -1.45385500 |
| C | 3.30088800 | -1.19311900 | -1.98146100 |
| H | 9.09435500 | -0.60065700 | 0.70908300  |
| H | 7.33848900 | 0.71977100  | 1.86035200  |
| H | 6.20346500 | -2.13654200 | -2.09376300 |
| H | 8.54157400 | -2.00466600 | -1.24548800 |
| H | 1.24723400 | -0.46121100 | -2.24367800 |
| H | 3.55413100 | -0.63425200 | -2.88593800 |

---

|   |             |             |             |
|---|-------------|-------------|-------------|
| N | 4.12556100  | -0.71084100 | -0.86971200 |
| S | 4.35424500  | 0.86872900  | 1.14518000  |
| N | 2.13547700  | 0.15477500  | -0.41249900 |
| C | 1.21304600  | -2.11258400 | -0.85886600 |
| C | 0.16023400  | -2.72967300 | -1.53183300 |
| C | 1.67015000  | -2.64402700 | 0.35265500  |
| C | -0.43646800 | -3.86921800 | -0.99402600 |
| H | -0.25504900 | -2.29968500 | -2.43874000 |
| C | 1.07220300  | -3.77995200 | 0.88706400  |
| H | 2.47922300  | -2.16358600 | 0.89834500  |
| C | 0.01636000  | -4.39429000 | 0.21249100  |
| H | -1.28393500 | -4.30663900 | -1.51234700 |
| H | 1.42472900  | -4.18075500 | 1.83166600  |
| H | -0.46118200 | -5.27150400 | 0.63740100  |
| H | 3.44553100  | -2.26159200 | -2.14212500 |
| C | -0.73953300 | 2.55983900  | -0.22957300 |
| C | -0.84635700 | 3.14866000  | 0.97238700  |
| C | 1.26199800  | 1.14779700  | 0.19139900  |
| C | -0.05155400 | 1.24505300  | -0.34686000 |
| H | -0.41585900 | 2.73231000  | 1.87161800  |
| H | -0.19563600 | 0.76036700  | -1.30885600 |
| O | 1.77327600  | 1.77863800  | 1.11564100  |
| C | -1.23948000 | 3.16358200  | -1.50164500 |
| C | -1.89067200 | 2.38525900  | -2.46873300 |
| C | -0.99002400 | 4.51302400  | -1.78505400 |
| C | -2.31946100 | 2.95941700  | -3.66303900 |
| H | -2.05969400 | 1.32370400  | -2.29250800 |
| C | -1.41252300 | 5.08033700  | -2.98276400 |
| H | -0.44308200 | 5.11659100  | -1.06886000 |

---

|    |             |             |             |
|----|-------------|-------------|-------------|
| C  | -2.08914400 | 4.30766100  | -3.92355800 |
| H  | -2.83243500 | 2.34345300  | -4.39514400 |
| H  | -1.20477000 | 6.12688800  | -3.18303300 |
| H  | -2.42313600 | 4.75000400  | -4.85695200 |
| Cl | -1.74130200 | 4.61471700  | 1.29773000  |
| N  | -2.12436700 | -0.76701300 | -1.40374900 |
| N  | -2.32493800 | -0.31066900 | -0.08749600 |
| C  | -1.20955000 | -0.19450300 | 0.64678400  |
| H  | -0.49296100 | -0.98867900 | 0.46428500  |
| C  | -3.44577000 | 0.60235900  | 0.14580000  |
| H  | -4.29376800 | 0.20333900  | -0.41503500 |
| C  | -3.77407800 | 0.67024600  | 1.63216800  |
| H  | -4.28577600 | -0.25784900 | 1.91995600  |
| C  | -2.54217200 | 0.80786900  | 2.49232000  |
| C  | -2.60433800 | 1.34147500  | 3.77880500  |
| H  | -3.54543200 | 1.74790300  | 4.13931500  |
| C  | -1.48061500 | 1.35270600  | 4.60040500  |
| H  | -1.54449700 | 1.78082100  | 5.59567900  |
| C  | -0.28069800 | 0.79836400  | 4.15396200  |
| H  | 0.59027400  | 0.78493000  | 4.80036200  |
| C  | -0.20447700 | 0.26894300  | 2.87175700  |
| H  | 0.72806600  | -0.15275100 | 2.50763200  |
| C  | -1.32084800 | 0.29777100  | 2.02963300  |
| C  | -2.82046900 | -1.85947600 | -1.73411200 |
| O  | -2.72182000 | -2.37362200 | -2.86725500 |
| C  | -3.77492600 | -2.53342200 | -0.76148400 |
| C  | -3.42863600 | -2.89525400 | 0.54516100  |
| C  | -5.04189000 | -2.87452800 | -1.24128800 |
| C  | -4.34136400 | -3.56697700 | 1.35606100  |

---

|   |             |             |             |
|---|-------------|-------------|-------------|
| H | -2.43710000 | -2.66903500 | 0.92393800  |
| C | -5.96304100 | -3.52479700 | -0.42531000 |
| H | -5.28897400 | -2.62681100 | -2.26900900 |
| C | -5.61414100 | -3.87220300 | 0.87857900  |
| H | -4.05676900 | -3.85238200 | 2.36441600  |
| H | -6.94896900 | -3.76956300 | -0.80881200 |
| H | -6.32702700 | -4.38588700 | 1.51619300  |
| H | -3.21110900 | 1.59663200  | -0.25421500 |
| H | -4.46717900 | 1.49513100  | 1.82050000  |

**TS3SR-90**

|   |            |             |             |
|---|------------|-------------|-------------|
| C | 7.57693800 | 0.85888900  | 1.35532400  |
| C | 6.55655900 | 0.16120300  | 1.99440800  |
| C | 5.31835700 | 0.09625900  | 1.36641600  |
| C | 5.11667900 | 0.71553000  | 0.12633000  |
| C | 6.13152400 | 1.41426700  | -0.51832100 |
| C | 7.36575100 | 1.47603700  | 0.11728300  |
| C | 3.04444400 | -0.18146700 | 0.52070700  |
| C | 1.68451600 | 0.25459000  | -1.29870900 |
| C | 3.04191400 | 1.00626600  | -1.46175300 |
| H | 8.55079800 | 0.92478200  | 1.82698300  |
| H | 6.72057700 | -0.31593900 | 2.95416200  |
| H | 5.96067700 | 1.88864200  | -1.47826200 |
| H | 8.17871600 | 2.01299100  | -0.35821300 |
| H | 0.83394500 | 0.94709100  | -1.31856000 |
| H | 2.93106100 | 2.09060200  | -1.39081000 |
| N | 3.81082300 | 0.51739500  | -0.31181000 |
| S | 3.84839400 | -0.71576900 | 1.94382000  |
| N | 1.79905700 | -0.32666800 | 0.07490400  |

---

|   |             |             |             |
|---|-------------|-------------|-------------|
| C | 1.45916900  | -0.81506400 | -2.34247200 |
| C | 0.55180900  | -0.55569700 | -3.37147800 |
| C | 2.15123000  | -2.02753900 | -2.30132700 |
| C | 0.34663200  | -1.51576900 | -4.36157000 |
| H | -0.00062800 | 0.38390400  | -3.37285300 |
| C | 1.93732500  | -2.98346200 | -3.28979900 |
| H | 2.84527500  | -2.23747300 | -1.49000500 |
| C | 1.03559800  | -2.72596900 | -4.32256200 |
| H | -0.36498900 | -1.32153800 | -5.15762800 |
| H | 2.46946300  | -3.92835600 | -3.25240300 |
| H | 0.86770500  | -3.47311600 | -5.09206600 |
| H | 3.54241200  | 0.74307900  | -2.39487400 |
| C | -1.45528300 | -2.11368000 | 0.65576700  |
| C | -1.55756100 | -2.49577300 | 1.94004000  |
| C | 0.82034900  | -1.07973900 | 0.82157200  |
| C | -0.50324900 | -1.04078400 | 0.28411300  |
| H | -0.99030300 | -2.02882300 | 2.73264700  |
| H | -0.56903900 | -0.73862100 | -0.75834900 |
| O | 1.22384400  | -1.56065500 | 1.87878500  |
| C | -2.21281300 | -2.73381300 | -0.47173400 |
| C | -1.55045000 | -3.00586400 | -1.67617800 |
| C | -3.57719000 | -3.03878100 | -0.38011700 |
| C | -2.22758100 | -3.57544700 | -2.74973300 |
| H | -0.49147700 | -2.77906700 | -1.77111800 |
| C | -4.25613900 | -3.60010900 | -1.45699300 |
| H | -4.11459200 | -2.82727100 | 0.53819100  |
| C | -3.58370100 | -3.87365600 | -2.64554100 |
| H | -1.68874400 | -3.77940400 | -3.67000600 |
| H | -5.31521400 | -3.82000800 | -1.36660400 |

---

|    |             |             |             |
|----|-------------|-------------|-------------|
| H  | -4.11384400 | -4.31238500 | -3.48493300 |
| Cl | -2.51611000 | -3.83466400 | 2.52373700  |
| N  | -1.24155600 | 1.46310600  | -1.28693700 |
| N  | -1.82143700 | 1.39169700  | -0.00958100 |
| C  | -1.02665200 | 0.84744600  | 0.93073900  |
| H  | -0.00432700 | 1.22205100  | 0.88634200  |
| C  | -3.28255400 | 1.35829500  | 0.11224200  |
| H  | -3.67751400 | 1.12307500  | -0.87931700 |
| C  | -3.76552600 | 0.33401600  | 1.13743300  |
| H  | -3.67954300 | -0.66737000 | 0.70334600  |
| C  | -2.94804600 | 0.36931100  | 2.40169900  |
| C  | -3.47407200 | 0.10504900  | 3.66310400  |
| H  | -4.53757000 | -0.09131500 | 3.76824500  |
| C  | -2.64437800 | 0.07941100  | 4.78276900  |
| H  | -3.06531600 | -0.13174100 | 5.76060600  |
| C  | -1.27832100 | 0.32505800  | 4.65115500  |
| H  | -0.63417800 | 0.30540400  | 5.52379000  |
| C  | -0.74348000 | 0.60050600  | 3.39638500  |
| H  | 0.32080100  | 0.78565500  | 3.27822000  |
| C  | -1.57612100 | 0.62382100  | 2.27596700  |
| C  | -1.38369000 | 2.60936000  | -1.96101400 |
| O  | -0.98533800 | 2.71163500  | -3.13956600 |
| C  | -2.01583200 | 3.84018000  | -1.33722600 |
| C  | -1.67572400 | 4.29629400  | -0.06024900 |
| C  | -2.90857800 | 4.58733900  | -2.10803200 |
| C  | -2.23297700 | 5.46980700  | 0.44116900  |
| H  | -0.97087200 | 3.73141500  | 0.54178400  |
| C  | -3.48331600 | 5.74927600  | -1.60058400 |
| H  | -3.13931800 | 4.24531200  | -3.11209900 |

---

|   |             |            |             |
|---|-------------|------------|-------------|
| C | -3.14573600 | 6.19364900 | -0.32372800 |
| H | -1.95397700 | 5.82012400 | 1.43023300  |
| H | -4.18714900 | 6.31429800 | -2.20410500 |
| H | -3.58592200 | 7.10385700 | 0.07151700  |
| H | -3.62876700 | 2.36286300 | 0.38635200  |
| H | -4.82379200 | 0.50686000 | 1.35235700  |

**TS3SR-180**

|   |             |             |             |
|---|-------------|-------------|-------------|
| C | -7.06690200 | -2.33739400 | 0.84192400  |
| C | -5.95713900 | -2.09061700 | 1.64332600  |
| C | -4.91575400 | -1.34601200 | 1.10163800  |
| C | -4.99393900 | -0.86315900 | -0.21127700 |
| C | -6.10220000 | -1.10220000 | -1.01639200 |
| C | -7.13736000 | -1.84971600 | -0.46813000 |
| C | -2.92997300 | -0.10735400 | 0.42819800  |
| C | -1.98938600 | 1.08444800  | -1.31569200 |
| C | -3.36377200 | 0.48939200  | -1.76209400 |
| H | -7.89084300 | -2.91739200 | 1.24178300  |
| H | -5.90409900 | -2.46714900 | 2.65874500  |
| H | -6.15063000 | -0.71812300 | -2.02925100 |
| H | -8.01538300 | -2.05854900 | -1.06876800 |
| H | -1.20198700 | 0.68135500  | -1.95440000 |
| H | -3.24790000 | -0.26417900 | -2.54409200 |
| N | -3.84245100 | -0.15213000 | -0.53588900 |
| S | -3.39934000 | -0.87205800 | 1.88934100  |
| N | -1.82216600 | 0.53366700  | 0.05506100  |
| C | -1.91874100 | 2.59477400  | -1.31591200 |
| C | -1.21321300 | 3.24334400  | -2.32877900 |
| C | -2.54508200 | 3.34339600  | -0.31671900 |



---

|    |             |             |             |
|----|-------------|-------------|-------------|
| C  | -1.13654000 | 4.63383300  | -2.34848900 |
| H  | -0.70899100 | 2.66052700  | -3.09526900 |
| C  | -2.46157100 | 4.73220700  | -0.33365900 |
| H  | -3.08267300 | 2.84360500  | 0.48575300  |
| C  | -1.75762500 | 5.37869900  | -1.34983100 |
| H  | -0.57791600 | 5.13142400  | -3.13415900 |
| H  | -2.94073900 | 5.30960700  | 0.44976300  |
| H  | -1.68856000 | 6.46149600  | -1.35706700 |
| H  | -4.06027100 | 1.26505500  | -2.08489900 |
| C  | 1.58901000  | 1.67798600  | 1.09246800  |
| C  | 1.86828300  | 1.27038900  | 2.33277900  |
| C  | -0.68442800 | 0.62304600  | 0.92269500  |
| C  | 0.57296900  | 0.95811000  | 0.27536800  |
| H  | 1.36967700  | 0.44174400  | 2.81449300  |
| H  | 0.40348400  | 1.47909600  | -0.66447000 |
| O  | -0.88477600 | 0.30595200  | 2.08647200  |
| C  | 2.26642300  | 2.81593600  | 0.41192300  |
| C  | 1.49880600  | 3.89782800  | -0.03383400 |
| C  | 3.64390400  | 2.80043300  | 0.17288300  |
| C  | 2.10251500  | 4.96729700  | -0.68869700 |
| H  | 0.42379300  | 3.90357200  | 0.13960300  |
| C  | 4.24234300  | 3.87276100  | -0.48471500 |
| H  | 4.20607600  | 1.91796300  | 0.46487600  |
| C  | 3.47813000  | 4.95768500  | -0.91146800 |
| H  | 1.49639300  | 5.80438100  | -1.02296700 |
| H  | 5.31107600  | 3.85523900  | -0.67442900 |
| H  | 3.95262100  | 5.78927000  | -1.42347500 |
| Cl | 3.06821900  | 2.01686100  | 3.35197500  |
| N  | 3.64079600  | -0.43691800 | 0.32577500  |

---

|   |             |             |             |
|---|-------------|-------------|-------------|
| N | 2.39614000  | -1.09812600 | 0.42578700  |
| C | 1.36662000  | -0.64996300 | -0.33918100 |
| H | 1.73383400  | -0.22023300 | -1.27151800 |
| C | 2.22430500  | -2.08393800 | 1.48220000  |
| H | 2.76924800  | -1.72695900 | 2.36267100  |
| C | 0.75385800  | -2.33574700 | 1.82576100  |
| H | 0.36881400  | -1.52057800 | 2.44796600  |
| C | -0.09430600 | -2.43475500 | 0.58245500  |
| C | -1.20294000 | -3.27376600 | 0.47936100  |
| H | -1.48015100 | -3.89325700 | 1.32832500  |
| C | -1.95604900 | -3.32303800 | -0.69380900 |
| H | -2.82255000 | -3.97412100 | -0.75410700 |
| C | -1.56682100 | -2.56944400 | -1.80059800 |
| H | -2.11077100 | -2.65122800 | -2.73708600 |
| C | -0.45410000 | -1.73370500 | -1.71037200 |
| H | -0.12581600 | -1.16335100 | -2.57717000 |
| C | 0.25047700  | -1.62840400 | -0.51105500 |
| C | 4.61518900  | -1.16340200 | -0.23498500 |
| O | 5.78857600  | -0.74573900 | -0.30746800 |
| C | 4.36848200  | -2.56334200 | -0.78675300 |
| C | 3.35735200  | -2.87188500 | -1.70090300 |
| C | 5.24555200  | -3.57757700 | -0.39432800 |
| C | 3.20597000  | -4.16976600 | -2.18350800 |
| H | 2.68915000  | -2.09292500 | -2.05368400 |
| C | 5.08918600  | -4.87965400 | -0.86146100 |
| H | 6.05564200  | -3.32434500 | 0.28278100  |
| C | 4.06333500  | -5.18109000 | -1.75566800 |
| H | 2.41519700  | -4.39019000 | -2.89486500 |
| H | 5.77146600  | -5.65849900 | -0.53372700 |

---

|   |            |             |             |
|---|------------|-------------|-------------|
| H | 3.93936900 | -6.19459700 | -2.12469500 |
| H | 2.69297100 | -3.02694100 | 1.16435900  |
| H | 0.67434000 | -3.25639200 | 2.41075300  |

**TS3SR-270**

|   |            |             |             |
|---|------------|-------------|-------------|
| C | 6.68177100 | -3.16551200 | -1.48487500 |
| C | 5.52317000 | -2.83080800 | -2.17886400 |
| C | 4.57290200 | -2.05509000 | -1.52463500 |
| C | 4.78788600 | -1.63017800 | -0.20777800 |
| C | 5.94241100 | -1.96150300 | 0.49266000  |
| C | 6.88676400 | -2.73730300 | -0.16849700 |
| C | 2.73158900 | -0.71642900 | -0.64503300 |
| C | 2.07601400 | 0.54330000  | 1.17520100  |
| C | 3.37937600 | -0.24511900 | 1.52157600  |
| H | 7.43720400 | -3.76887800 | -1.97511700 |
| H | 5.36542700 | -3.16422600 | -3.19842200 |
| H | 6.09309300 | -1.62496400 | 1.51243700  |
| H | 7.79878900 | -3.01403500 | 0.34817200  |
| H | 1.28909600 | 0.26867900  | 1.87976600  |
| H | 3.20168600 | -1.01908000 | 2.27209900  |
| N | 3.71277500 | -0.86832200 | 0.23918500  |
| S | 3.01618800 | -1.48390100 | -2.15670200 |
| N | 1.72198400 | 0.01706700  | -0.17423700 |
| C | 2.27158000 | 2.04213400  | 1.16940500  |
| C | 1.79174600 | 2.79079100  | 2.24312000  |
| C | 2.95615400 | 2.67576600  | 0.12982000  |
| C | 2.00242000 | 4.16720200  | 2.28478800  |
| H | 1.24253800 | 2.29489000  | 3.04014500  |
| C | 3.15934400 | 4.05181900  | 0.16938900  |

---

|    |             |             |             |
|----|-------------|-------------|-------------|
| H  | 3.31530300  | 2.10081200  | -0.72083400 |
| C  | 2.68616800  | 4.79820100  | 1.24854900  |
| H  | 1.62094000  | 4.74627700  | 3.11937200  |
| H  | 3.68204800  | 4.54316200  | -0.64427400 |
| H  | 2.84374600  | 5.87144400  | 1.27557500  |
| H  | 4.18375500  | 0.41808700  | 1.84411800  |
| C  | -1.31139500 | 1.96571800  | -1.20242800 |
| C  | -1.72382500 | 1.62367500  | -2.42672300 |
| C  | 0.57041000  | 0.30501100  | -0.99649500 |
| C  | -0.49256300 | 1.03610900  | -0.37296500 |
| H  | -1.55444200 | 0.64837000  | -2.85782000 |
| H  | -0.21345900 | 1.49254600  | 0.57270000  |
| O  | 0.57531000  | -0.21018400 | -2.10835900 |
| C  | -1.66834900 | 3.24881900  | -0.53375500 |
| C  | -0.66633500 | 4.07296300  | -0.00986600 |
| C  | -3.00673000 | 3.62024600  | -0.36884900 |
| C  | -0.99468500 | 5.25598800  | 0.64521700  |
| H  | 0.37708400  | 3.78877200  | -0.12696000 |
| C  | -3.33500800 | 4.79937600  | 0.29455400  |
| H  | -3.78589000 | 2.97273500  | -0.75999400 |
| C  | -2.33026900 | 5.62197900  | 0.79972200  |
| H  | -0.20308400 | 5.88796500  | 1.03719400  |
| H  | -4.37770200 | 5.07338900  | 0.42029100  |
| H  | -2.58746200 | 6.54141700  | 1.31613300  |
| Cl | -2.62403900 | 2.68819800  | -3.47636000 |
| N  | -3.02303400 | -1.05898600 | -1.62805900 |
| N  | -2.06563800 | -1.33280000 | -0.62211600 |
| C  | -1.70951800 | -0.38003800 | 0.25907200  |
| H  | -2.49832200 | 0.35334600  | 0.42314100  |

---

|   |             |             |             |
|---|-------------|-------------|-------------|
| C | -1.43185900 | -2.64581300 | -0.68093000 |
| H | -1.27214200 | -2.88146500 | -1.73657500 |
| C | -0.11523100 | -2.72349600 | 0.08801900  |
| H | 0.68115600  | -2.29978500 | -0.53204000 |
| C | -0.19181000 | -1.99109800 | 1.40459200  |
| C | 0.52756000  | -2.38830700 | 2.53246300  |
| H | 1.15580500  | -3.27409100 | 2.47843200  |
| C | 0.43818700  | -1.67010500 | 3.72436200  |
| H | 1.00065300  | -1.99274100 | 4.59464200  |
| C | -0.39148200 | -0.55102100 | 3.80316500  |
| H | -0.47963900 | -0.00079700 | 4.73427700  |
| C | -1.11069900 | -0.14458900 | 2.68211700  |
| H | -1.74934500 | 0.73467200  | 2.72704100  |
| C | -1.00246300 | -0.85187000 | 1.48264200  |
| C | -4.20327500 | -1.66885300 | -1.44220400 |
| O | -5.10677500 | -1.63000400 | -2.29902600 |
| C | -4.51626800 | -2.47804100 | -0.18664400 |
| C | -4.37642000 | -1.99004100 | 1.11506400  |
| C | -5.03312200 | -3.76474600 | -0.36526100 |
| C | -4.71678800 | -2.78005400 | 2.21158200  |
| H | -4.01918200 | -0.97853500 | 1.27954500  |
| C | -5.35813000 | -4.56391600 | 0.72672300  |
| H | -5.17792300 | -4.12572400 | -1.37892800 |
| C | -5.19679600 | -4.07370400 | 2.02179800  |
| H | -4.60678400 | -2.38175000 | 3.21599800  |
| H | -5.74728200 | -5.56548000 | 0.56912400  |
| H | -5.45439500 | -4.69136900 | 2.87666500  |
| H | -2.13901100 | -3.38322300 | -0.27767900 |
| H | 0.14190700  | -3.77336900 | 0.25402700  |

---

**TS3SS-90**

|   |             |             |             |
|---|-------------|-------------|-------------|
| C | 7.45890300  | 0.08535000  | 1.21765200  |
| C | 6.35737500  | -0.34136600 | 1.95317500  |
| C | 5.12110600  | -0.37189800 | 1.31910800  |
| C | 5.00059600  | 0.01477800  | -0.02156000 |
| C | 6.09624700  | 0.44345700  | -0.76282000 |
| C | 7.32849100  | 0.47232300  | -0.12062000 |
| C | 2.82974300  | -0.52541800 | 0.48492900  |
| C | 1.52871900  | -0.24236000 | -1.40510700 |
| C | 2.98655200  | 0.23461000  | -1.69243900 |
| H | 8.43309000  | 0.11855200  | 1.69214000  |
| H | 6.45870800  | -0.64064400 | 2.99047100  |
| H | 5.98635100  | 0.74214000  | -1.79946500 |
| H | 8.20356200  | 0.80090100  | -0.67002800 |
| H | 0.80462200  | 0.57396700  | -1.52849600 |
| H | 3.04483000  | 1.31117400  | -1.86776500 |
| N | 3.68062200  | -0.09735400 | -0.44500200 |
| S | 3.55891900  | -0.86212500 | 2.00634100  |
| N | 1.57756200  | -0.60087400 | 0.04567900  |
| C | 1.09054900  | -1.39214700 | -2.28118600 |
| C | 0.24002900  | -1.11001600 | -3.35230000 |
| C | 1.53986200  | -2.69594300 | -2.06294200 |
| C | -0.14289500 | -2.13719100 | -4.21402900 |
| H | -0.13006900 | -0.09324500 | -3.48587300 |
| C | 1.14561100  | -3.71838700 | -2.92071400 |
| H | 2.18425800  | -2.91747000 | -1.21480100 |
| C | 0.30716200  | -3.43811700 | -4.00047800 |
| H | -0.80642500 | -1.92075600 | -5.04530300 |

---

|    |             |             |             |
|----|-------------|-------------|-------------|
| H  | 1.48837700  | -4.73304700 | -2.74600600 |
| H  | -0.00036400 | -4.23708900 | -4.66783900 |
| H  | 3.43472800  | -0.30254400 | -2.53042500 |
| C  | -1.73487300 | -2.12566000 | 0.79387200  |
| C  | -1.68797300 | -2.66310400 | 2.02475300  |
| C  | 0.51132300  | -1.03669500 | 0.92372900  |
| C  | -0.79562100 | -1.07997100 | 0.35147600  |
| H  | -0.97144100 | -2.36096000 | 2.77313700  |
| H  | -0.83360800 | -0.87512900 | -0.71345500 |
| O  | 0.87138300  | -1.33990400 | 2.06176500  |
| C  | -2.74748000 | -2.51515900 | -0.23156900 |
| C  | -2.31820300 | -2.89307900 | -1.50916500 |
| C  | -4.12015900 | -2.46959500 | 0.03258900  |
| C  | -3.23908900 | -3.23369500 | -2.49379300 |
| H  | -1.25400700 | -2.92890700 | -1.72700800 |
| C  | -5.04243400 | -2.80031000 | -0.95659600 |
| H  | -4.46992300 | -2.17473900 | 1.01749200  |
| C  | -4.60468900 | -3.18609400 | -2.22129200 |
| H  | -2.88439500 | -3.53063600 | -3.47631100 |
| H  | -6.10465100 | -2.75364500 | -0.73859400 |
| H  | -5.32474300 | -3.44376600 | -2.99153700 |
| Cl | -2.74508100 | -3.94434800 | 2.57340700  |
| N  | -1.05718000 | 1.41893800  | -1.36476500 |
| N  | -1.21442700 | 1.70435500  | 0.00033900  |
| C  | -1.84993400 | 0.75161200  | 0.70291000  |
| H  | -2.68461700 | 0.29706900  | 0.17509200  |
| C  | -0.08169000 | 2.36188700  | 0.65760700  |
| H  | 0.27365300  | 3.15090300  | -0.00671500 |
| C  | -0.49672300 | 2.93323200  | 2.00228700  |

---

|   |             |             |             |
|---|-------------|-------------|-------------|
| H | -1.14904700 | 3.79893100  | 1.82677500  |
| C | -1.25129700 | 1.91963900  | 2.82445900  |
| C | -1.35402600 | 2.03556800  | 4.20779600  |
| H | -0.80381500 | 2.82350700  | 4.71519300  |
| C | -2.16646700 | 1.17073800  | 4.93767700  |
| H | -2.23313700 | 1.27188800  | 6.01623500  |
| C | -2.91537400 | 0.19952100  | 4.27847300  |
| H | -3.57767900 | -0.45445200 | 4.83594700  |
| C | -2.81896300 | 0.07246600  | 2.89720600  |
| H | -3.42035700 | -0.66372600 | 2.37780100  |
| C | -1.96000100 | 0.90081100  | 2.16502900  |
| C | -1.08783900 | 2.46761700  | -2.19924600 |
| O | -0.73255900 | 2.34354200  | -3.38788700 |
| C | -1.53785800 | 3.84725100  | -1.75031300 |
| C | -2.61031500 | 4.06207000  | -0.87863600 |
| C | -0.87437300 | 4.95008300  | -2.29312900 |
| C | -2.99676100 | 5.35849400  | -0.54574900 |
| H | -3.14876700 | 3.21465300  | -0.46884400 |
| C | -1.24613600 | 6.24536900  | -1.94567200 |
| H | -0.07073700 | 4.76911700  | -2.99974900 |
| C | -2.30889700 | 6.45193200  | -1.06822000 |
| H | -3.83844300 | 5.51492600  | 0.12202400  |
| H | -0.71501000 | 7.09376500  | -2.36637900 |
| H | -2.60631300 | 7.46097600  | -0.80007500 |
| H | 0.72481700  | 1.62240100  | 0.78442500  |
| H | 0.38443200  | 3.29361700  | 2.54088400  |

**TS3SS-180**

|   |             |             |            |
|---|-------------|-------------|------------|
| C | -7.60223000 | -1.34445300 | 0.55729300 |
|---|-------------|-------------|------------|



---

|   |             |             |             |
|---|-------------|-------------|-------------|
| C | -6.65449100 | -0.85356100 | 1.45053800  |
| C | -5.40225100 | -0.51388000 | 0.95231700  |
| C | -5.11647300 | -0.66336100 | -0.41086900 |
| C | -6.05826100 | -1.15165400 | -1.30970100 |
| C | -7.30663000 | -1.49193900 | -0.80227900 |
| C | -3.12041000 | 0.13213700  | 0.38429800  |
| C | -1.65196800 | 0.37283100  | -1.37792700 |
| C | -2.97711400 | -0.28169500 | -1.88374000 |
| H | -8.58506600 | -1.61742400 | 0.92422600  |
| H | -6.88433000 | -0.74017300 | 2.50418300  |
| H | -5.82223000 | -1.25909000 | -2.36262200 |
| H | -8.06352800 | -1.87784300 | -1.47567800 |
| H | -0.81639600 | -0.30364600 | -1.57577300 |
| H | -2.82653500 | -1.31636400 | -2.20253700 |
| N | -3.81246600 | -0.26086200 | -0.68143100 |
| S | -4.01079400 | 0.12439800  | 1.85243900  |
| N | -1.86347300 | 0.45014700  | 0.08996900  |
| C | -1.36342000 | 1.73906700  | -1.95898500 |
| C | -0.33976700 | 1.89136600  | -2.89249800 |
| C | -2.11263800 | 2.84968100  | -1.56313200 |
| C | -0.06303200 | 3.14663000  | -3.42902300 |
| H | 0.25153700  | 1.02956400  | -3.19251800 |
| C | -1.83545000 | 4.10289900  | -2.09907200 |
| H | -2.89961100 | 2.74180300  | -0.82037400 |
| C | -0.81006600 | 4.25224600  | -3.03268800 |
| H | 0.74415600  | 3.26100800  | -4.14452000 |
| H | -2.41459900 | 4.96449400  | -1.78414800 |
| H | -0.59096400 | 5.23199800  | -3.44477000 |
| H | -3.44012300 | 0.29969600  | -2.68277500 |

---

|    |             |             |             |
|----|-------------|-------------|-------------|
| C  | 1.38158700  | 1.71206500  | 1.47964900  |
| C  | 1.39364900  | 1.67549900  | 2.81816000  |
| C  | -0.92003900 | 0.80581500  | 1.11981400  |
| C  | 0.44586900  | 0.85865900  | 0.70895200  |
| H  | 0.75924300  | 1.02147900  | 3.40000700  |
| H  | 0.59063000  | 0.95789500  | -0.36236600 |
| O  | -1.39986000 | 0.91652500  | 2.24675000  |
| C  | 2.20815600  | 2.65427800  | 0.67060100  |
| C  | 1.56264900  | 3.54825000  | -0.18903200 |
| C  | 3.60537900  | 2.64814700  | 0.72671400  |
| C  | 2.29758700  | 4.44519100  | -0.96150200 |
| H  | 0.47592400  | 3.54164900  | -0.25667700 |
| C  | 4.33641300  | 3.54170200  | -0.04918200 |
| H  | 4.11144100  | 1.89622300  | 1.32117500  |
| C  | 3.68758000  | 4.44723100  | -0.88838500 |
| H  | 1.77915600  | 5.13395400  | -1.62226300 |
| H  | 5.42106200  | 3.51604200  | -0.01110600 |
| H  | 4.26511700  | 5.14019700  | -1.49292400 |
| Cl | 2.37327600  | 2.72345200  | 3.81471500  |
| N  | 3.20951100  | -0.38766900 | 0.48091200  |
| N  | 2.15233200  | -1.24433200 | 0.14799300  |
| C  | 1.07344100  | -1.12155000 | 0.94194800  |
| H  | 1.31744800  | -0.94067500 | 1.98683000  |
| C  | 1.89959200  | -1.43417400 | -1.28051400 |
| H  | 2.86018800  | -1.58380700 | -1.77227800 |
| C  | 0.98702800  | -2.62779800 | -1.52179800 |
| H  | 1.56841100  | -3.54429500 | -1.35626400 |
| C  | -0.19366600 | -2.64575200 | -0.58314500 |
| C  | -1.34782600 | -3.37368300 | -0.87632600 |

---

|   |             |             |             |
|---|-------------|-------------|-------------|
| H | -1.42553400 | -3.87712300 | -1.83699200 |
| C | -2.38156200 | -3.48046600 | 0.05231300  |
| H | -3.27344000 | -4.04931100 | -0.19090800 |
| C | -2.24813800 | -2.88562500 | 1.30684700  |
| H | -3.03046500 | -2.99686100 | 2.05108600  |
| C | -1.11067600 | -2.14084400 | 1.60314500  |
| H | -1.01528900 | -1.65026500 | 2.56767600  |
| C | -0.09643500 | -1.98407000 | 0.65107900  |
| C | 4.44052000  | -0.86535200 | 0.26272800  |
| O | 5.44875700  | -0.14714200 | 0.40762400  |
| C | 4.69579300  | -2.30234000 | -0.17921000 |
| C | 4.03132900  | -3.41366000 | 0.34992900  |
| C | 5.70812600  | -2.50942100 | -1.12059200 |
| C | 4.36259100  | -4.70088400 | -0.07054300 |
| H | 3.26067000  | -3.27285500 | 1.09997400  |
| C | 6.02567300  | -3.79161400 | -1.55779500 |
| H | 6.24513600  | -1.64280700 | -1.49302600 |
| C | 5.35126900  | -4.89286400 | -1.03345900 |
| H | 3.85030800  | -5.55622400 | 0.36003200  |
| H | 6.80540400  | -3.93404500 | -2.29989600 |
| H | 5.60194900  | -5.89583300 | -1.36500100 |
| H | 1.46870200  | -0.49963500 | -1.68041100 |
| H | 0.65600700  | -2.64113100 | -2.56519000 |

**TS3SS-270**

|   |            |             |            |
|---|------------|-------------|------------|
| C | 6.36474500 | -2.32637300 | 1.52371100 |
| C | 5.29542200 | -1.75131600 | 2.20326600 |
| C | 4.03994000 | -1.80617600 | 1.60982100 |
| C | 3.86529400 | -2.43318900 | 0.37155400 |

---

|   |             |             |             |
|---|-------------|-------------|-------------|
| C | 4.92844500  | -3.00791200 | -0.31406500 |
| C | 6.18247700  | -2.94189700 | 0.28002200  |
| C | 1.73566800  | -1.73751000 | 0.81506700  |
| C | 0.43191800  | -2.10540300 | -1.04048300 |
| C | 1.88900000  | -2.59659300 | -1.31201800 |
| H | 7.35443900  | -2.29211800 | 1.96519100  |
| H | 5.43740900  | -1.26977600 | 3.16447300  |
| H | 4.77881500  | -3.47964000 | -1.27885700 |
| H | 7.03434400  | -3.37685800 | -0.23082500 |
| H | 0.24057000  | -1.23524800 | -1.67151400 |
| H | 2.40177500  | -1.95603400 | -2.03265400 |
| N | 2.53323300  | -2.39169300 | -0.01618800 |
| S | 2.51729800  | -1.13607500 | 2.21885100  |
| N | 0.48841900  | -1.61829900 | 0.35943400  |
| C | -0.63357800 | -3.16059700 | -1.21717100 |
| C | -1.47475100 | -3.11876800 | -2.32842900 |
| C | -0.79305100 | -4.17457200 | -0.26961500 |
| C | -2.46908600 | -4.08055900 | -2.49363500 |
| H | -1.36039200 | -2.32217000 | -3.05928300 |
| C | -1.78914000 | -5.13260300 | -0.43145500 |
| H | -0.15064900 | -4.19942600 | 0.60700800  |
| C | -2.62782000 | -5.08737400 | -1.54495100 |
| H | -3.12619900 | -4.03533000 | -3.35591700 |
| H | -1.91480700 | -5.91160700 | 0.31321900  |
| H | -3.40667500 | -5.83303300 | -1.66863800 |
| H | 1.92436100  | -3.64785500 | -1.60336300 |
| C | -2.75836300 | 0.11867200  | 0.87400000  |
| C | -2.74978400 | 0.92940500  | 1.94303200  |
| C | -0.38311000 | -0.63871400 | 0.94974300  |

---

|    |             |             |             |
|----|-------------|-------------|-------------|
| C  | -1.49572000 | -0.17656900 | 0.15218900  |
| H  | -1.85023300 | 1.41200500  | 2.29750000  |
| H  | -1.67435000 | -0.78275200 | -0.73007900 |
| O  | -0.08910000 | -0.30268600 | 2.09360300  |
| C  | -3.98933700 | -0.53382000 | 0.33842200  |
| C  | -3.96217100 | -1.88906200 | -0.01699700 |
| C  | -5.17727700 | 0.18310700  | 0.14638800  |
| C  | -5.09553200 | -2.51269100 | -0.53127800 |
| H  | -3.04874900 | -2.46433400 | 0.11763800  |
| C  | -6.30664100 | -0.43855700 | -0.37675100 |
| H  | -5.20395800 | 1.23825500  | 0.39662700  |
| C  | -6.27146200 | -1.79009900 | -0.71416000 |
| H  | -5.05175300 | -3.56559200 | -0.79276500 |
| H  | -7.21601200 | 0.13567200  | -0.52503100 |
| H  | -7.15354500 | -2.27411300 | -1.12148400 |
| Cl | -4.12300300 | 1.26233300  | 2.97047800  |
| N  | 1.37903800  | 0.75809900  | -0.78991000 |
| N  | 0.51531400  | 1.83048100  | -0.52307300 |
| C  | -0.75636700 | 1.57645900  | -0.88143300 |
| H  | -0.84139300 | 1.03872800  | -1.82006700 |
| C  | 0.70048500  | 2.57763000  | 0.73454700  |
| H  | 1.76993300  | 2.73537500  | 0.87308100  |
| C  | -0.03191400 | 3.90772400  | 0.64347600  |
| H  | 0.49927700  | 4.55433300  | -0.06776000 |
| C  | -1.45293600 | 3.72476000  | 0.17155600  |
| C  | -2.44106600 | 4.67520700  | 0.42994200  |
| H  | -2.19410100 | 5.54280700  | 1.03588200  |
| C  | -3.72527200 | 4.52617500  | -0.08345200 |
| H  | -4.48325400 | 5.27374300  | 0.12720300  |

---

|   |             |            |             |
|---|-------------|------------|-------------|
| C | -4.03581200 | 3.41843600 | -0.87316200 |
| H | -5.03448200 | 3.29816400 | -1.28099500 |
| C | -3.06387700 | 2.46024800 | -1.12593700 |
| H | -3.30642000 | 1.57510800 | -1.70993200 |
| C | -1.77556800 | 2.60263500 | -0.60413900 |
| C | 2.66290200  | 1.02570000 | -1.03107500 |
| O | 3.49251000  | 0.09285900 | -1.14298500 |
| C | 3.20384500  | 2.43560200 | -1.17555100 |
| C | 2.53622500  | 3.45436100 | -1.86260400 |
| C | 4.46831400  | 2.69419300 | -0.64000200 |
| C | 3.11994700  | 4.71339700 | -1.99281100 |
| H | 1.56111500  | 3.26164300 | -2.29745400 |
| C | 5.04259600  | 3.95658400 | -0.75152200 |
| H | 4.98972600  | 1.88363200 | -0.14084800 |
| C | 4.36763300  | 4.97088100 | -1.42883900 |
| H | 2.59880700  | 5.49490500 | -2.53746400 |
| H | 6.01944900  | 4.14777000 | -0.31782300 |
| H | 4.81533700  | 5.95522900 | -1.52440800 |
| H | 0.32811700  | 1.96885500 | 1.56672800  |
| H | -0.01285500 | 4.41077500 | 1.61487000  |

**Guanidine**

|   |             |             |             |
|---|-------------|-------------|-------------|
| C | 2.10404300  | -0.04864200 | 0.76996300  |
| C | 1.21512700  | 1.21928100  | 0.61773300  |
| C | -0.01065900 | -0.60846700 | -0.02638400 |
| C | -1.20931100 | 1.28364300  | -0.23851300 |
| C | -2.02202000 | 0.00624300  | -0.60360600 |
| H | 2.40666900  | -0.16577000 | 1.81801400  |
| H | 0.80989900  | 1.53067700  | 1.59299700  |

---

|   |             |             |             |
|---|-------------|-------------|-------------|
| H | -1.46134300 | 1.65359000  | 0.76891700  |
| H | -1.35136900 | 2.09670800  | -0.95369400 |
| H | -2.14639700 | -0.01807800 | -1.69903800 |
| H | 1.75950500  | 2.06287400  | 0.18746000  |
| N | 0.15035900  | 0.75809800  | -0.26208600 |
| N | -1.16694200 | -1.12739600 | -0.19856200 |
| N | 1.17983300  | -1.13197600 | 0.39610300  |
| H | 1.16487900  | -1.99579200 | 0.91567900  |
| C | -3.43443900 | -0.07378900 | 0.00584200  |
| C | -4.13364200 | -1.30848300 | -0.57312900 |
| C | -3.37748600 | -0.20515800 | 1.53065400  |
| C | -4.21682700 | 1.18523500  | -0.38232300 |
| H | -4.22474300 | -1.22933600 | -1.66224400 |
| H | -3.56302000 | -2.21193000 | -0.34266200 |
| H | -5.14043700 | -1.41230600 | -0.15501300 |
| H | -2.92470700 | 0.67284600  | 2.00305400  |
| H | -4.38965000 | -0.31075700 | 1.93487400  |
| H | -2.79517600 | -1.08542900 | 1.81500700  |
| H | -5.25132200 | 1.11566000  | -0.03036900 |
| H | -3.77590900 | 2.08565800  | 0.05949800  |
| H | -4.23845700 | 1.31469700  | -1.47039000 |
| C | 3.38681800  | -0.05592000 | -0.09131000 |
| C | 4.05797500  | -1.42601100 | 0.05636900  |
| C | 3.05586600  | 0.18998100  | -1.56569800 |
| C | 4.34451800  | 1.02294700  | 0.42599500  |
| H | 4.28843000  | -1.64124800 | 1.10629100  |
| H | 3.41019000  | -2.21980200 | -0.32608900 |
| H | 4.99624000  | -1.45182000 | -0.50624200 |
| H | 2.60596000  | 1.17564700  | -1.72069700 |

---

|   |            |             |             |
|---|------------|-------------|-------------|
| H | 3.96889600 | 0.13750500  | -2.16742800 |
| H | 2.35599900 | -0.56532100 | -1.93475100 |
| H | 5.28356800 | 0.99118000  | -0.13505500 |
| H | 3.92969800 | 2.02960000  | 0.31578500  |
| H | 4.58007400 | 0.86471200  | 1.48435400  |

**M2-Gua**

|   |             |             |             |
|---|-------------|-------------|-------------|
| C | 4.18348900  | -0.55469400 | 0.21019600  |
| C | 4.15783800  | 0.68678800  | -0.72343300 |
| C | 2.09221600  | 0.37528700  | 0.18135600  |
| C | 2.05530300  | 2.19742500  | -1.16042200 |
| C | 0.67425200  | 2.04392600  | -0.46026600 |
| H | 4.71706700  | -0.29563000 | 1.13509900  |
| H | 5.01010500  | 1.34482400  | -0.55286200 |
| H | 2.42143700  | 3.22397400  | -1.15074400 |
| H | 2.02284200  | 1.83698400  | -2.19679500 |
| H | -0.12317800 | 2.00275800  | -1.20738300 |
| H | 4.13284500  | 0.39705600  | -1.78283100 |
| N | 2.89858100  | 1.32630500  | -0.34553100 |
| N | 0.80532100  | 0.69792800  | 0.16725100  |
| N | 2.75244800  | -0.71802700 | 0.51551000  |
| H | 2.26977300  | -1.45609800 | 1.01563600  |
| C | 0.36102300  | 3.17476900  | 0.55405400  |
| C | -0.95614500 | 2.88915800  | 1.28449200  |
| C | 1.48026300  | 3.32081000  | 1.59129200  |
| C | 0.19553000  | 4.48664400  | -0.22606300 |
| H | -1.79501000 | 2.83483100  | 0.58289900  |
| H | -0.91893900 | 1.94837800  | 1.83839300  |
| H | -1.15869600 | 3.70051200  | 1.99083500  |



---

|   |             |             |             |
|---|-------------|-------------|-------------|
| H | 2.44081100  | 3.57246100  | 1.13156200  |
| H | 1.22415600  | 4.12156500  | 2.29150700  |
| H | 1.60384500  | 2.39920300  | 2.16900500  |
| H | -0.11659600 | 5.28087400  | 0.45840200  |
| H | 1.12288400  | 4.81512600  | -0.70392700 |
| H | -0.57387700 | 4.38941000  | -0.99943700 |
| C | 4.82878600  | -1.82386700 | -0.37509100 |
| C | 4.83830400  | -2.90624400 | 0.71165000  |
| C | 4.06422300  | -2.34436500 | -1.59639000 |
| C | 6.27204400  | -1.48041300 | -0.76160900 |
| H | 5.36467200  | -2.56225900 | 1.60792900  |
| H | 3.82362100  | -3.20030100 | 0.99936000  |
| H | 5.34555100  | -3.80252900 | 0.34304200  |
| H | 4.07319400  | -1.63252600 | -2.42725400 |
| H | 4.53284600  | -3.26661400 | -1.95221600 |
| H | 3.02253700  | -2.56771300 | -1.34882100 |
| H | 6.78785300  | -2.37859500 | -1.11294400 |
| H | 6.30822600  | -0.73967900 | -1.56750200 |
| H | 6.82778900  | -1.08500500 | 0.09553000  |
| C | -2.59468000 | -1.01004400 | 0.19450500  |
| C | -2.47511800 | -2.22482200 | 0.77013700  |
| C | -0.20971900 | -0.33481800 | 0.47839200  |
| C | -1.48141300 | -0.09533800 | 0.01068500  |
| H | -1.53791300 | -2.61463000 | 1.13292500  |
| H | -1.69125600 | 0.81363300  | -0.53421000 |
| O | 0.25373800  | -1.31725300 | 1.10483200  |
| C | -3.90751100 | -0.49622700 | -0.30129500 |
| C | -4.65996600 | -1.20669800 | -1.24095700 |
| C | -4.38070300 | 0.74428900  | 0.13953700  |

---

|    |             |             |             |
|----|-------------|-------------|-------------|
| C  | -5.86063000 | -0.69354900 | -1.72314800 |
| H  | -4.29161000 | -2.16352100 | -1.59772600 |
| C  | -5.58606000 | 1.25528900  | -0.33466900 |
| H  | -3.79735200 | 1.30073200  | 0.86855700  |
| C  | -6.32908800 | 0.53797000  | -1.26941100 |
| H  | -6.43009000 | -1.25496900 | -2.45742900 |
| H  | -5.94517300 | 2.21426800  | 0.02607900  |
| H  | -7.26658600 | 0.93670100  | -1.64408100 |
| Cl | -3.83550200 | -3.29213500 | 1.09581700  |

**TS3RR-Gua**

|   |             |             |             |
|---|-------------|-------------|-------------|
| C | -3.57748500 | -2.23101900 | 1.43489900  |
| C | -3.61843700 | -2.61036500 | -0.06764400 |
| C | -1.47337900 | -2.20345600 | 0.55312400  |
| C | -1.50998500 | -2.85342400 | -1.62244900 |
| C | -0.03508600 | -2.63557100 | -1.18144300 |
| H | -3.68022000 | -3.13988000 | 2.04535300  |
| H | -4.22878900 | -3.49538200 | -0.24999900 |
| H | -1.64864000 | -3.79844700 | -2.14908600 |
| H | -1.89154900 | -2.01662000 | -2.21498900 |
| H | 0.41097400  | -1.87165200 | -1.82186400 |
| H | -3.93149100 | -1.77455100 | -0.70496600 |
| N | -2.20268200 | -2.87543700 | -0.33657900 |
| N | -0.18224100 | -2.07573800 | 0.19630300  |
| N | -2.18260100 | -1.75281400 | 1.57188000  |
| H | -1.72775600 | -1.41038800 | 2.40672100  |
| C | 0.83112300  | -3.91934500 | -1.19576400 |
| C | 2.23346100  | -3.63570300 | -0.63953800 |
| C | 0.17958700  | -5.02077400 | -0.35101400 |

---

|   |             |             |             |
|---|-------------|-------------|-------------|
| C | 0.98090900  | -4.38739700 | -2.64931500 |
| H | 2.77794400  | -2.90995700 | -1.25366500 |
| H | 2.19853800  | -3.25534200 | 0.38635900  |
| H | 2.81290700  | -4.56411400 | -0.63168200 |
| H | -0.81042800 | -5.29773900 | -0.72643300 |
| H | 0.80592100  | -5.91759400 | -0.36902000 |
| H | 0.07651300  | -4.70376800 | 0.69178700  |
| H | 1.64646500  | -5.25474200 | -2.68931600 |
| H | 0.02745400  | -4.68537400 | -3.09478500 |
| H | 1.41861400  | -3.59961800 | -3.27178100 |
| C | -4.64164500 | -1.22319800 | 1.90245500  |
| C | -4.31879500 | -0.80355800 | 3.34197200  |
| C | -4.70256500 | 0.01733800  | 1.00544700  |
| C | -5.99568300 | -1.94274500 | 1.87377000  |
| H | -4.18084500 | -1.67522800 | 3.99156400  |
| H | -3.41295100 | -0.18872100 | 3.38680700  |
| H | -5.13796600 | -0.20473500 | 3.75027400  |
| H | -5.10130600 | -0.21285400 | 0.01372600  |
| H | -5.35131700 | 0.76948500  | 1.46559300  |
| H | -3.71153200 | 0.45482500  | 0.85826800  |
| H | -6.78602400 | -1.26111500 | 2.20143800  |
| H | -6.24503500 | -2.27917800 | 0.86189800  |
| H | -6.00050800 | -2.81319600 | 2.53831100  |
| C | 2.94293200  | -0.10946900 | 0.70937800  |
| C | 2.98780900  | 0.45151600  | 1.92882500  |
| C | 0.62098300  | -1.08640300 | 0.84523600  |
| C | 1.66075000  | -0.47228400 | 0.06822900  |
| H | 2.10292500  | 0.62811200  | 2.52060300  |
| H | 1.82449900  | -0.95548800 | -0.88413700 |

---

|    |             |             |             |
|----|-------------|-------------|-------------|
| O  | 0.29773300  | -0.79248900 | 1.99689800  |
| C  | 4.15495400  | -0.40483200 | -0.10851800 |
| C  | 5.26152200  | -1.05610000 | 0.44910100  |
| C  | 4.17416400  | -0.12293700 | -1.48021100 |
| C  | 6.36251400  | -1.38756500 | -0.33480700 |
| H  | 5.24899800  | -1.32035000 | 1.50097100  |
| C  | 5.27750300  | -0.44609900 | -2.26437100 |
| H  | 3.31262500  | 0.35046800  | -1.94194700 |
| C  | 6.37889100  | -1.07816500 | -1.69275600 |
| H  | 7.20696100  | -1.89794700 | 0.11749200  |
| H  | 5.27292000  | -0.20844500 | -3.32343200 |
| H  | 7.23835100  | -1.33749000 | -2.30238800 |
| Cl | 4.43813100  | 1.03283800  | 2.71250800  |
| N  | -1.48199500 | 0.23311500  | -0.93364800 |
| N  | -0.70994600 | 1.22495400  | -0.29187000 |
| C  | 0.59405300  | 1.26982700  | -0.59546400 |
| H  | 0.80273900  | 0.98707700  | -1.62391500 |
| C  | -1.25480600 | 1.81467600  | 0.93457200  |
| H  | -1.84624100 | 1.03478400  | 1.42164500  |
| C  | -0.18410600 | 2.31763400  | 1.90244100  |
| H  | 0.16953800  | 1.46719600  | 2.49334000  |
| C  | 0.99000900  | 2.93695100  | 1.19295500  |
| C  | 1.72281400  | 3.99134300  | 1.72979300  |
| H  | 1.41871700  | 4.41960800  | 2.68115300  |
| C  | 2.83755900  | 4.49271400  | 1.06113600  |
| H  | 3.40400700  | 5.31159800  | 1.49283800  |
| C  | 3.21997500  | 3.94639000  | -0.16180800 |
| H  | 4.08200500  | 4.33902800  | -0.69066500 |
| C  | 2.48848900  | 2.89707200  | -0.70887400 |

---

|   |             |             |             |
|---|-------------|-------------|-------------|
| H | 2.77535700  | 2.47997200  | -1.66972700 |
| C | 1.38041500  | 2.38535600  | -0.03340700 |
| C | -2.55282200 | 0.66884300  | -1.60115200 |
| O | -3.37122800 | -0.13672500 | -2.10466700 |
| C | -2.86072800 | 2.14440900  | -1.77560300 |
| C | -1.90913400 | 3.08720800  | -2.17593600 |
| C | -4.18058900 | 2.55692000  | -1.57895400 |
| C | -2.27039600 | 4.42048400  | -2.35347200 |
| H | -0.88528200 | 2.77889500  | -2.36069600 |
| C | -4.53906600 | 3.89256200  | -1.73560200 |
| H | -4.92128900 | 1.81071100  | -1.30812800 |
| C | -3.58248300 | 4.82880400  | -2.12225300 |
| H | -1.52533200 | 5.14197300  | -2.67459300 |
| H | -5.56590300 | 4.20203100  | -1.56590300 |
| H | -3.85916500 | 5.87045500  | -2.25208100 |
| H | -1.93315800 | 2.62777200  | 0.64468300  |
| H | -0.63560400 | 3.03500200  | 2.59343600  |

**TS3RS-Gua**

|   |             |             |             |
|---|-------------|-------------|-------------|
| C | 3.59770700  | -1.65379900 | -1.22163200 |
| C | 3.00517900  | -2.97455500 | -0.66408900 |
| C | 1.32415600  | -1.50443600 | -1.12165700 |
| C | 0.41548600  | -3.48623300 | -0.44677600 |
| C | -0.72652700 | -2.50977400 | -0.85768100 |
| H | 3.86483000  | -1.80699400 | -2.27677300 |
| H | 3.43373500  | -3.85235000 | -1.14781900 |
| H | 0.29018000  | -4.47531100 | -0.88691600 |
| H | 0.49598800  | -3.59412600 | 0.64198200  |
| H | -1.43735900 | -2.38516900 | -0.03302800 |

---

|   |             |             |             |
|---|-------------|-------------|-------------|
| H | 3.13461100  | -3.05675800 | 0.42330200  |
| N | 1.59062900  | -2.81669900 | -0.99397600 |
| N | 0.02054100  | -1.22954700 | -1.04936100 |
| N | 2.41317600  | -0.76431700 | -1.17834200 |
| H | 2.37285700  | 0.22659300  | -1.39443100 |
| C | -1.48219900 | -2.97432600 | -2.13120300 |
| C | -2.49187700 | -1.91423300 | -2.58131000 |
| C | -0.51059200 | -3.24126000 | -3.28684600 |
| C | -2.26046700 | -4.25067300 | -1.78064100 |
| H | -3.23453200 | -1.70680300 | -1.80395600 |
| H | -1.99809000 | -0.97641900 | -2.85426200 |
| H | -3.02610200 | -2.27688200 | -3.46491800 |
| H | 0.21022100  | -4.03006400 | -3.05284500 |
| H | -1.07454900 | -3.55737400 | -4.16916700 |
| H | 0.04257300  | -2.33467300 | -3.55345900 |
| H | -2.85777900 | -4.56132900 | -2.64243500 |
| H | -1.60647800 | -5.08708100 | -1.51900900 |
| H | -2.94382300 | -4.07463400 | -0.94288800 |
| C | 4.83477100  | -1.10716800 | -0.49155400 |
| C | 5.25677300  | 0.20120000  | -1.17141400 |
| C | 4.56313000  | -0.84788300 | 0.99182400  |
| C | 5.95186100  | -2.14654900 | -0.64816900 |
| H | 5.41826800  | 0.05345800  | -2.24507000 |
| H | 4.51131500  | 0.99068400  | -1.03142800 |
| H | 6.19164600  | 0.56381800  | -0.73394600 |
| H | 4.40968200  | -1.77552700 | 1.55267900  |
| H | 5.42320700  | -0.33770000 | 1.43613400  |
| H | 3.69180500  | -0.20621400 | 1.13744400  |
| H | 6.86997600  | -1.77478100 | -0.18462100 |

---

|    |             |             |             |
|----|-------------|-------------|-------------|
| H  | 5.69421500  | -3.09297700 | -0.16042200 |
| H  | 6.16378000  | -2.34817600 | -1.70377100 |
| C  | -2.27310700 | 1.74063600  | -0.51026300 |
| C  | -1.53622600 | 2.85003600  | -0.34576000 |
| C  | -0.43638800 | 0.15344800  | -1.11390800 |
| C  | -1.62140100 | 0.42413500  | -0.34522600 |
| H  | -0.48481600 | 2.81006100  | -0.08309700 |
| H  | -2.31362300 | -0.40843200 | -0.30504900 |
| O  | 0.25540800  | 0.90028500  | -1.79338700 |
| C  | -3.74440100 | 1.76500600  | -0.74395500 |
| C  | -4.29999600 | 1.09944400  | -1.84099400 |
| C  | -4.59921200 | 2.41153000  | 0.15622200  |
| C  | -5.67765700 | 1.08724200  | -2.04058000 |
| H  | -3.64174000 | 0.60598900  | -2.54950500 |
| C  | -5.97764700 | 2.39077700  | -0.03631900 |
| H  | -4.17248600 | 2.92159900  | 1.01547400  |
| C  | -6.52029300 | 1.72990300  | -1.13633700 |
| H  | -6.09332300 | 0.57693300  | -2.90382500 |
| H  | -6.62840400 | 2.89037800  | 0.67435900  |
| H  | -7.59483300 | 1.71580500  | -1.28794600 |
| Cl | -2.14122300 | 4.47283900  | -0.57664000 |
| N  | 0.97570000  | 1.17268000  | 1.16508100  |
| N  | 0.22334500  | 0.27369700  | 1.92014800  |
| C  | -1.09985100 | 0.36223900  | 1.71782000  |
| H  | -1.47468700 | 1.38276800  | 1.73143400  |
| C  | 0.84709000  | -1.00565200 | 2.25981500  |
| H  | 1.86051700  | -0.77956300 | 2.58830000  |
| C  | 0.06375900  | -1.69208100 | 3.36495200  |
| H  | 0.20604900  | -1.12486300 | 4.29325000  |

---

|   |             |             |             |
|---|-------------|-------------|-------------|
| C | -1.40614400 | -1.74248500 | 3.04160500  |
| C | -2.23481000 | -2.75413900 | 3.52990300  |
| H | -1.79668900 | -3.55826000 | 4.11536400  |
| C | -3.60330100 | -2.73520800 | 3.28442200  |
| H | -4.23472700 | -3.53059200 | 3.66701600  |
| C | -4.16280800 | -1.68667800 | 2.55308400  |
| H | -5.23147800 | -1.65705900 | 2.36853800  |
| C | -3.34715400 | -0.67939300 | 2.05573600  |
| H | -3.77933500 | 0.13421300  | 1.47724300  |
| C | -1.96508500 | -0.70577500 | 2.27997500  |
| C | 2.10971500  | 1.56712600  | 1.74743300  |
| O | 2.53988900  | 1.28583400  | 2.88679200  |
| C | 2.96172100  | 2.41036200  | 0.82201800  |
| C | 2.54430500  | 2.77476800  | -0.46421700 |
| C | 4.22657500  | 2.79948600  | 1.26493900  |
| C | 3.38558600  | 3.52192600  | -1.28667300 |
| H | 1.56720000  | 2.45524400  | -0.81679400 |
| C | 5.06716800  | 3.54369100  | 0.44126700  |
| H | 4.52881000  | 2.49814700  | 2.26260700  |
| C | 4.64835500  | 3.90751600  | -0.83744900 |
| H | 3.05433500  | 3.80361100  | -2.28175100 |
| H | 6.04996900  | 3.84081700  | 0.79511600  |
| H | 5.30133700  | 4.48992400  | -1.48033800 |
| H | 0.89659400  | -1.63877200 | 1.36532400  |
| H | 0.45867400  | -2.69810700 | 3.53653400  |

**TS3SR-Gua**

|   |             |             |             |
|---|-------------|-------------|-------------|
| C | -4.09514200 | -1.35754200 | -0.27958200 |
| C | -3.78507500 | -2.54134600 | 0.68536900  |



---

|   |             |             |             |
|---|-------------|-------------|-------------|
| C | -1.94506100 | -1.21428700 | 0.48196400  |
| C | -1.42014700 | -2.98877000 | 1.78377400  |
| C | -0.25467700 | -1.96288700 | 1.82604600  |
| H | -4.77673100 | -0.64619300 | 0.20543300  |
| H | -4.55339400 | -2.65608300 | 1.44993800  |
| H | -1.66026400 | -3.39007200 | 2.76808400  |
| H | -1.21970500 | -3.81700600 | 1.09188000  |
| H | 0.69729100  | -2.43385500 | 1.56409200  |
| H | -3.67113700 | -3.49067600 | 0.14662100  |
| N | -2.50132700 | -2.14885600 | 1.26857200  |
| N | -0.62482000 | -1.04420500 | 0.69293600  |
| N | -2.77261800 | -0.72011300 | -0.40140100 |
| H | -2.50419100 | 0.02190300  | -1.03700200 |
| C | -0.11872700 | -1.27549200 | 3.21049200  |
| C | 0.80695500  | -0.06252600 | 3.10773300  |
| C | -1.46721500 | -0.79172600 | 3.76235000  |
| C | 0.50027700  | -2.30281700 | 4.16888400  |
| H | 1.82654200  | -0.35441400 | 2.82871400  |
| H | 0.39845500  | 0.65301600  | 2.38567100  |
| H | 0.86643500  | 0.43181700  | 4.08335700  |
| H | -2.17817400 | -1.61110500 | 3.90485200  |
| H | -1.29740900 | -0.33145400 | 4.74117500  |
| H | -1.90397300 | -0.03551100 | 3.10467900  |
| H | 0.64052400  | -1.84559300 | 5.15263100  |
| H | -0.13549500 | -3.18368000 | 4.30541800  |
| H | 1.47890900  | -2.64018200 | 3.81099300  |
| C | -4.68044100 | -1.74580400 | -1.64930200 |
| C | -4.95608600 | -0.45539000 | -2.43100600 |
| C | -3.71352000 | -2.62890600 | -2.44498300 |

---

|    |             |             |             |
|----|-------------|-------------|-------------|
| C  | -6.00203300 | -2.48203100 | -1.40474300 |
| H  | -5.59603800 | 0.22439000  | -1.85903400 |
| H  | -4.03255300 | 0.08138700  | -2.67435000 |
| H  | -5.45510400 | -0.68995900 | -3.37605600 |
| H  | -3.56616400 | -3.60764500 | -1.97768300 |
| H  | -4.12107900 | -2.80476700 | -3.44478900 |
| H  | -2.73525000 | -2.14976200 | -2.55238800 |
| H  | -6.47734400 | -2.72090700 | -2.36043500 |
| H  | -5.84838800 | -3.42346900 | -0.86644700 |
| H  | -6.69633900 | -1.86317800 | -0.82638200 |
| C  | 2.60295200  | -0.91807500 | -1.13952100 |
| C  | 2.37843800  | -0.96714700 | -2.46434700 |
| C  | 0.20188400  | -0.74799400 | -0.46016500 |
| C  | 1.57449700  | -0.41299500 | -0.20507600 |
| H  | 1.43729700  | -0.68960900 | -2.91458800 |
| H  | 1.87640800  | -0.44877300 | 0.83374300  |
| O  | -0.33434900 | -0.74417800 | -1.56398800 |
| C  | 3.88363000  | -1.36683700 | -0.51690400 |
| C  | 4.38431100  | -2.64384200 | -0.79590200 |
| C  | 4.57014100  | -0.56294400 | 0.40004200  |
| C  | 5.55178100  | -3.09861400 | -0.19142300 |
| H  | 3.84464600  | -3.28496300 | -1.48575900 |
| C  | 5.74383100  | -1.01509600 | 0.99751100  |
| H  | 4.19404300  | 0.42754500  | 0.63792200  |
| C  | 6.23985900  | -2.28255100 | 0.70356900  |
| H  | 5.92224500  | -4.09348500 | -0.41802100 |
| H  | 6.27105100  | -0.37102500 | 1.69460500  |
| H  | 7.15353600  | -2.63458900 | 1.17201100  |
| Cl | 3.58247300  | -1.42690300 | -3.64914100 |

---

|   |             |            |             |
|---|-------------|------------|-------------|
| N | -0.90812600 | 2.20968800 | -0.35049500 |
| N | 0.40515400  | 2.18594500 | 0.14603800  |
| C | 1.33813500  | 1.59980100 | -0.62409100 |
| H | 0.97054300  | 1.32328700 | -1.61394300 |
| C | 0.75672700  | 3.15918000 | 1.18381300  |
| H | 0.01109200  | 3.07515900 | 1.97560200  |
| C | 2.15470000  | 2.90256800 | 1.73291400  |
| H | 2.15059100  | 1.97938700 | 2.32415800  |
| C | 3.14852000  | 2.77571800 | 0.61311300  |
| C | 4.45514900  | 3.24993900 | 0.69902800  |
| H | 4.78118700  | 3.74821800 | 1.60819100  |
| C | 5.33528200  | 3.09258500 | -0.36938300 |
| H | 6.35328500  | 3.46060200 | -0.29095700 |
| C | 4.90027200  | 2.48323900 | -1.54439300 |
| H | 5.57546100  | 2.37779400 | -2.38700900 |
| C | 3.59459900  | 2.01311300 | -1.64253300 |
| H | 3.25067400  | 1.54876000 | -2.56019800 |
| C | 2.72125500  | 2.13242000 | -0.55684100 |
| C | -1.84035300 | 2.03621700 | 0.58264200  |
| O | -1.69680600 | 1.70949300 | 1.78614100  |
| C | -3.24764800 | 2.27905700 | 0.06917200  |
| C | -3.50994900 | 2.81721700 | -1.19492600 |
| C | -4.31936400 | 1.97340800 | 0.91185000  |
| C | -4.82122700 | 3.05020300 | -1.60313200 |
| H | -2.67245000 | 3.06042100 | -1.83946600 |
| C | -5.63105900 | 2.20276700 | 0.50350100  |
| H | -4.09565800 | 1.56459700 | 1.89256600  |
| C | -5.88549700 | 2.74772300 | -0.75455500 |
| H | -5.01261200 | 3.47601100 | -2.58361000 |

---

|   |             |            |             |
|---|-------------|------------|-------------|
| H | -6.45572900 | 1.96649200 | 1.16971200  |
| H | -6.90675700 | 2.93677000 | -1.07125300 |
| H | 0.69736200  | 4.16433900 | 0.74232900  |
| H | 2.43387200  | 3.71645300 | 2.40785300  |

**TS3SS-Gua**

|   |             |             |             |
|---|-------------|-------------|-------------|
| C | 3.86055600  | -1.08890600 | 1.18861600  |
| C | 3.97841200  | -1.54302400 | -0.29511400 |
| C | 1.84103500  | -1.84230900 | 0.40467000  |
| C | 2.02401100  | -2.54708200 | -1.73784900 |
| C | 0.62627100  | -2.91661400 | -1.19648300 |
| H | 4.14692300  | -0.03470900 | 1.28150400  |
| H | 4.84373300  | -2.18695400 | -0.46271800 |
| H | 2.47421700  | -3.38413200 | -2.27193800 |
| H | 2.01946700  | -1.63765400 | -2.35276500 |
| H | 0.67788000  | -3.94322600 | -0.80762300 |
| H | 3.99175200  | -0.69470600 | -0.98946300 |
| N | 2.73000000  | -2.28704800 | -0.48918100 |
| N | 0.56137600  | -2.05507400 | 0.05676300  |
| N | 2.40703200  | -1.20798700 | 1.41481600  |
| H | 1.87647500  | -0.93060600 | 2.22790500  |
| C | -0.48496600 | -2.91012000 | -2.26081200 |
| C | -0.02863100 | -3.91230000 | -3.34235900 |
| C | -0.65752800 | -1.52614700 | -2.93480200 |
| C | -1.78784500 | -3.48775700 | -1.67453000 |
| H | 0.19138200  | -4.89624200 | -2.91412100 |
| H | 0.85482800  | -3.55812300 | -3.88025600 |
| H | -0.83305600 | -4.03461200 | -4.07353800 |
| H | -0.16751900 | -0.73013600 | -2.36570600 |

---

|   |             |             |             |
|---|-------------|-------------|-------------|
| H | -1.71723400 | -1.28123600 | -3.06004100 |
| H | -0.20483300 | -1.52364300 | -3.93025700 |
| H | -2.58273400 | -3.44257200 | -2.42566200 |
| H | -2.14232100 | -2.96688300 | -0.78468800 |
| H | -1.63740700 | -4.53887300 | -1.40596300 |
| C | 4.68382500  | -1.90900700 | 2.20540600  |
| C | 6.17076400  | -1.63211700 | 1.95694300  |
| C | 4.39341300  | -3.40703500 | 2.07346900  |
| C | 4.32348300  | -1.44203100 | 3.62112700  |
| H | 6.39515700  | -0.56546700 | 2.06371200  |
| H | 6.48749700  | -1.94844300 | 0.95853500  |
| H | 6.77726600  | -2.17871500 | 2.68497300  |
| H | 3.32979500  | -3.61756400 | 2.22318800  |
| H | 4.95463900  | -3.96053000 | 2.83241100  |
| H | 4.68632700  | -3.79443300 | 1.09270300  |
| H | 4.97193900  | -1.93109900 | 4.35388700  |
| H | 3.29033400  | -1.69594600 | 3.87873300  |
| H | 4.45350100  | -0.35916000 | 3.72665300  |
| C | -2.83026300 | -0.58420000 | 0.78929700  |
| C | -2.93080000 | -0.19957500 | 2.07181700  |
| C | -0.43383000 | -1.33963000 | 0.82369000  |
| C | -1.51362400 | -0.71527500 | 0.12653400  |
| H | -2.06601300 | 0.00223300  | 2.68600800  |
| H | -1.59984400 | -1.03194000 | -0.89820000 |
| O | -0.18041100 | -1.20753300 | 2.02281700  |
| C | -4.00226400 | -0.89289400 | -0.07969000 |
| C | -5.02319900 | -1.74082500 | 0.36435300  |
| C | -4.05687500 | -0.42259000 | -1.39786600 |
| C | -6.07638500 | -2.08840900 | -0.47632300 |

---

|    |             |             |             |
|----|-------------|-------------|-------------|
| H  | -4.97721000 | -2.14469600 | 1.37007100  |
| C  | -5.11325200 | -0.76209600 | -2.23793200 |
| H  | -3.26076200 | 0.21330900  | -1.77624700 |
| C  | -6.12938100 | -1.59640900 | -1.77820500 |
| H  | -6.85339500 | -2.75410000 | -0.11406100 |
| H  | -5.13855300 | -0.37829100 | -3.25291500 |
| H  | -6.95131100 | -1.86867000 | -2.43230900 |
| Cl | -4.43126400 | 0.11090200  | 2.90850600  |
| N  | 1.45415300  | 0.54889400  | -1.02539200 |
| N  | 0.64266900  | 1.30846500  | -0.16074800 |
| C  | -0.68637400 | 1.22013000  | -0.30142000 |
| H  | -1.00510400 | 1.06726200  | -1.32974500 |
| C  | 1.26150700  | 1.94205000  | 1.00545700  |
| H  | 2.16539800  | 1.37074000  | 1.23286700  |
| C  | 0.32217500  | 1.99119700  | 2.20620200  |
| H  | 0.20969200  | 0.98309700  | 2.62191400  |
| C  | -1.03327700 | 2.50358800  | 1.78895400  |
| C  | -1.82581300 | 3.31110400  | 2.59983800  |
| H  | -1.45491100 | 3.61450900  | 3.57507500  |
| C  | -3.08349500 | 3.72912900  | 2.16922800  |
| H  | -3.69495900 | 4.35409600  | 2.81203300  |
| C  | -3.55150500 | 3.35139900  | 0.91305200  |
| H  | -4.52633100 | 3.68141600  | 0.57043900  |
| C  | -2.76494000 | 2.54632600  | 0.09617400  |
| H  | -3.12876700 | 2.24957600  | -0.88316000 |
| C  | -1.51247700 | 2.11335200  | 0.53216900  |
| C  | 2.29294500  | 1.23767700  | -1.80456000 |
| O  | 3.13849300  | 0.64319300  | -2.51205300 |
| C  | 2.30311800  | 2.75441700  | -1.86264900 |

---

|   |            |            |             |
|---|------------|------------|-------------|
| C | 1.15002800 | 3.53503400 | -1.98847100 |
| C | 3.54860200 | 3.38642800 | -1.84467600 |
| C | 1.24428400 | 4.92224600 | -2.07046900 |
| H | 0.17452900 | 3.06185800 | -2.03606800 |
| C | 3.64403600 | 4.77309900 | -1.90734000 |
| H | 4.43983700 | 2.76913400 | -1.78928300 |
| C | 2.48947400 | 5.54541700 | -2.01835600 |
| H | 0.34221400 | 5.51723400 | -2.17520400 |
| H | 4.61824700 | 5.25164300 | -1.87825300 |
| H | 2.55968700 | 6.62730400 | -2.07316600 |
| H | 1.56708000 | 2.95918500 | 0.72439200  |
| H | 0.75538300 | 2.63194100 | 2.97928200  |

**TS1B''**

|   |             |             |             |
|---|-------------|-------------|-------------|
| C | 0.42214700  | 0.19733700  | -0.17118400 |
| C | 1.36195900  | -0.62878500 | 0.48872700  |
| C | 2.17810000  | 1.28988300  | 0.17645800  |
| C | 1.12956700  | 1.28888900  | -0.71468700 |
| H | 1.07011200  | -1.19763000 | 1.36677600  |
| H | 0.95823900  | 1.94858100  | -1.55527000 |
| O | 3.03864800  | 1.73478200  | 0.83627500  |
| C | -1.03209100 | 0.08003100  | -0.05820300 |
| C | -1.61515600 | -1.16428900 | 0.21552300  |
| C | -1.85134200 | 1.20164000  | -0.24635800 |
| C | -2.99724600 | -1.28286000 | 0.30156100  |
| H | -0.97935100 | -2.03669100 | 0.33363700  |
| C | -3.23232500 | 1.07748600  | -0.17136600 |
| H | -1.39433000 | 2.17019600  | -0.42743300 |
| C | -3.80522300 | -0.16393300 | 0.10601800  |

---

|                |             |             |             |
|----------------|-------------|-------------|-------------|
| H              | -3.44612500 | -2.24828700 | 0.50957200  |
| H              | -3.86362600 | 1.94785100  | -0.31600000 |
| H              | -4.88441700 | -0.25865400 | 0.17047100  |
| Cl             | 2.63999800  | -1.50447200 | -0.37240500 |
| <b>M1B''</b>   |             |             |             |
| C              | 0.40714500  | -0.06543400 | 0.05846600  |
| C              | 0.99994900  | -1.22091700 | -0.27798600 |
| C              | 2.37601100  | 1.45907700  | 0.28436900  |
| C              | 1.09162500  | 1.16807600  | 0.44030600  |
| H              | 0.45468000  | -2.09324100 | -0.60960000 |
| H              | 0.52670100  | 1.96590000  | 0.91111900  |
| O              | 3.47841600  | 1.80579700  | 0.17533000  |
| C              | -1.08135000 | -0.00653400 | 0.03513200  |
| C              | -1.84893400 | -1.08166100 | 0.49654000  |
| C              | -1.73466300 | 1.12831600  | -0.45884200 |
| C              | -3.23837800 | -1.03018400 | 0.44602300  |
| H              | -1.35257900 | -1.94959900 | 0.91970500  |
| C              | -3.12401000 | 1.17913700  | -0.50627300 |
| H              | -1.14866500 | 1.96624600  | -0.82504500 |
| C              | -3.88024000 | 0.09942400  | -0.05590800 |
| H              | -3.82025200 | -1.86999500 | 0.81194000  |
| H              | -3.61587000 | 2.06283000  | -0.89979800 |
| H              | -4.96398400 | 0.14098700  | -0.08973800 |
| Cl             | 2.72292400  | -1.43795900 | -0.25836400 |
| Opt-IRC-R-1-SR |             |             |             |
| C              | -6.93158500 | -2.48133600 | -0.82117400 |
| C              | -5.89652200 | -2.02320500 | -1.63343900 |



---

|   |             |             |             |
|---|-------------|-------------|-------------|
| C | -4.69120000 | -1.67946400 | -1.03519900 |
| C | -4.53547600 | -1.79469800 | 0.35233800  |
| C | -5.56227700 | -2.24805600 | 1.17147000  |
| C | -6.76629100 | -2.58887700 | 0.56229100  |
| C | -2.46926600 | -1.00196300 | -0.27055900 |
| C | -1.19114300 | -0.68996300 | 1.59310800  |
| C | -2.62285300 | -1.15814500 | 2.02252300  |
| H | -7.87890200 | -2.75619000 | -1.27157200 |
| H | -6.02856000 | -1.93459500 | -2.70652100 |
| H | -5.42433100 | -2.33085800 | 2.24409800  |
| H | -7.58787000 | -2.94390700 | 1.17461000  |
| H | -1.00492300 | 0.32962700  | 1.94901100  |
| H | -3.17407400 | -0.37993500 | 2.55518500  |
| N | -3.25438700 | -1.40848700 | 0.73018600  |
| S | -3.22880400 | -1.02992800 | -1.81467500 |
| N | -1.26289400 | -0.64629600 | 0.11918100  |
| C | -0.11049800 | -1.62474200 | 2.09360400  |
| C | 0.59286400  | -1.31315300 | 3.25808200  |
| C | 0.15039600  | -2.82791200 | 1.43267700  |
| C | 1.54219300  | -2.20068400 | 3.76497400  |
| H | 0.39617400  | -0.37452200 | 3.77098500  |
| C | 1.09959300  | -3.71106600 | 1.93753200  |
| H | -0.37637400 | -3.06061200 | 0.51115000  |
| C | 1.79372100  | -3.40160100 | 3.10658900  |
| H | 2.08649400  | -1.94930400 | 4.66947400  |
| H | 1.30648100  | -4.63680400 | 1.41075600  |
| H | 2.53752500  | -4.08958900 | 3.49491600  |
| H | -2.58643600 | -2.07007300 | 2.62165900  |
| C | 1.68423200  | -1.18367600 | -1.21497400 |

---

|    |             |             |             |
|----|-------------|-------------|-------------|
| C  | 0.99062500  | -1.89351100 | -2.11172400 |
| C  | -0.45466400 | 0.26775300  | -0.79629500 |
| C  | 1.05726800  | 0.03304200  | -0.56829500 |
| H  | 0.01798500  | -1.57850800 | -2.46486200 |
| H  | 1.22226000  | -0.06163900 | 0.51083200  |
| O  | -0.91394500 | 0.20957800  | -1.99411900 |
| C  | 3.04858800  | -1.56148600 | -0.74575400 |
| C  | 3.35711500  | -1.58295200 | 0.61812200  |
| C  | 4.05946500  | -1.87138500 | -1.66356300 |
| C  | 4.63057200  | -1.93685500 | 1.05453700  |
| H  | 2.59488000  | -1.34165300 | 1.35333500  |
| C  | 5.33489900  | -2.21408500 | -1.22947800 |
| H  | 3.84451300  | -1.82294400 | -2.72627800 |
| C  | 5.62417200  | -2.25518300 | 0.13317600  |
| H  | 4.84181300  | -1.96053700 | 2.11948000  |
| H  | 6.10666400  | -2.44308300 | -1.95777600 |
| H  | 6.61904800  | -2.52582700 | 0.47251100  |
| Cl | 1.51270800  | -3.42102200 | -2.78454000 |
| N  | -0.54650400 | 1.66954500  | -0.15768800 |
| N  | 0.68110900  | 2.37695700  | -0.30273900 |
| C  | 1.60103700  | 1.42372700  | -0.97683700 |
| H  | 1.45818600  | 1.52098700  | -2.05950600 |
| C  | 1.15032600  | 2.94073700  | 0.98121000  |
| H  | 0.27492700  | 3.05425000  | 1.62429800  |
| C  | 2.25195200  | 2.14150600  | 1.68229100  |
| H  | 1.86147000  | 1.17884900  | 2.04084600  |
| C  | 3.38266100  | 1.94311600  | 0.70937500  |
| C  | 4.72243200  | 2.09830700  | 1.05770300  |
| H  | 4.98060500  | 2.34029300  | 2.08550800  |

---

|   |             |            |             |
|---|-------------|------------|-------------|
| C | 5.72353100  | 1.94567000 | 0.10120200  |
| H | 6.76527000  | 2.06035700 | 0.38362100  |
| C | 5.38458100  | 1.65448000 | -1.21815300 |
| H | 6.15990000  | 1.53622000 | -1.96818700 |
| C | 4.04621900  | 1.52176600 | -1.57648700 |
| H | 3.77487800  | 1.29468700 | -2.60459800 |
| C | 3.04370400  | 1.65479300 | -0.61838300 |
| C | -1.73325100 | 2.31102000 | -0.00463200 |
| O | -2.77410500 | 1.67770600 | 0.20695400  |
| C | -1.78213700 | 3.81635400 | 0.00421200  |
| C | -1.05974500 | 4.61920700 | -0.88359300 |
| C | -2.68946100 | 4.40718500 | 0.88680700  |
| C | -1.24239000 | 5.99907200 | -0.87416000 |
| H | -0.36027100 | 4.15995000 | -1.57134400 |
| C | -2.85062700 | 5.78852500 | 0.91163000  |
| H | -3.26978200 | 3.76609900 | 1.54233200  |
| C | -2.12665600 | 6.58685000 | 0.02867800  |
| H | -0.68937700 | 6.61807300 | -1.57342000 |
| H | -3.54740300 | 6.24001100 | 1.61059300  |
| H | -2.25549000 | 7.66462300 | 0.03949800  |
| H | 1.53106900  | 3.94703400 | 0.77280800  |
| H | 2.59500700  | 2.69076300 | 2.56470300  |
